# Supplementary material for: Environmental DNA from archived leaves reveals widespread temporal turnover and biotic homogenization in forest arthropod communities
Source: eLife journal article supplement (doi:10.7554/elife.78521), 2022-11-07
Supplement: supp [file elife-78521-supp-v1.zip]

Archive with 17 entries (17 files):
- elife_poa_e78521_Figure_2_figure_supplement_1.pdf
- elife_poa_e78521_Figure_2_figure_supplement_2.pdf
- elife_poa_e78521_Figure_2_figure_supplement_3.pdf
- elife_poa_e78521_Figure_2_figure_supplement_4.pdf
- elife_poa_e78521_Figure_2_figure_supplement_5.pdf
- elife_poa_e78521_Figure_2_figure_supplement_6.pdf
- elife_poa_e78521_Figure_2_figure_supplement_7.pdf
- elife_poa_e78521_Figure_3_figure_supplement_1.png
- elife_poa_e78521_Figure_4_figure_supplement_1.tif
- elife_poa_e78521_Figure_4_figure_supplement_2.png
- elife_poa_e78521_Figure_4_figure_supplement_3.png
- elife_poa_e78521_Figure_5_figure_supplement_1.tif
- __MACOSX/._elife_poa_e78521_Figure_5_figure_supplement_1.tif
- elife_poa_e78521_Figure_5_figure_supplement_2.pdf
- elife_poa_e78521_Supplementary_file_1.xlsx
- elife_poa_e78521_Supplementary_file_2.xlsx
- elife_poa_e78521_Supplementary_file_3.xlsx
