# Supplementary material for: Environmental DNA from archived leaves reveals widespread temporal turnover and biotic homogenization in forest arthropod communities
Source: eLife journal article supplement (doi:10.7554/elife.78521), 2022-11-07
Supplement: supp [file elife-78521-supp-v1.zip › elife_poa_e78521_Supplementary_file_1.xlsx]

## Sheet: Sheet1
Primer Name	Sequence 5'-3' (Illumina Truseq-tails in red)	Experiment	Reference
ZBJ-ArtF1c	ACACTCTTTCCCTACACGACGCTCTTCCGATCTAGATATTGGAACWTTATATTTTATTTTTGG	Community metabarcoding	Zeale et al. 2011
ZBJ-ArtR2c	GTGACTGGAGTTCAGACGTGTGCTCTTCCGATCTWACTAATCAATTWCCAAATCCTCC	Community metabarcoding	Zeale et al. 2011
NoPlantF_270	ACACTCTTTCCCTACACGACGCTCTTCCGATCTRGCHTTYCCHCGWATAAAYAAYATAAG	Community metabarcoding	Krehenwinkel et al. 2022
mICOlinR_W	GTGACTGGAGTTCAGACGTGTGCTCTTCCGATCTGRGGRTAWACWGTTCAWCCWGTNCC	Community metabarcoding	Krehenwinkel et al. 2022
18S_Insect_F1	ACACTCTTTCCCTACACGACGCTCTTCCGATCTGGGGAGGTAGTGACRAA	qPCR inner primer	This study
18S_Plant_F1	ACACTCTTTCCCTACACGACGCTCTTCCGATCTGGGGAGGTAGTGACAAT	qPCR inner primer	This study
18S_Insect_R1	GTGACTGGAGTTCAGACGTGTGCTCTTCCGATCTTTTTAACCGCAACAACTTT	qPCR inner primer	This study
18S_Plant_R1	GTGACTGGAGTTCAGACGTGTGCTCTTCCGATCTTTTTAACTGCAACAACTTA	qPCR inner primer	This study
18S_Insect_F2	ACACTCTTTCCCTACACGACGCTCTTCCGATCTCGGGGAGGTAGTGACRAA	qPCR inner primer	This study
18S_Plant_F2	ACACTCTTTCCCTACACGACGCTCTTCCGATCTYGGGGAGGTAGTGACAAT	qPCR inner primer	This study
18S_Insect_R2	GTGACTGGAGTTCAGACGTGTGCTCTTCCGATCTACCGCAACAACTTTARTATACGC	qPCR inner primer	This study
18S_Plant_R2	GTGACTGGAGTTCAGACGTGTGCTCTTCCGATCTACTGCAACAACTTAAATATACGC	qPCR inner primer	This study
qPCR_Tail_F2	ACACTCTTTCCCTACACGACG	nested qPCR	This study
qPCR_Tail_R2	GTGACTGGAGTTCAGACGTGT	nested qPCR	This study
