# Supplementary material for: Environmental DNA from archived leaves reveals widespread temporal turnover and biotic homogenization in forest arthropod communities
Source: eLife journal article supplement (doi:10.7554/elife.78521), 2022-11-07
Supplement: supp [file elife-78521-supp-v1.zip › elife_poa_e78521_Supplementary_file_2.xlsx]

## Sheet: OTU_Table
ID	Site_ID	Sitetype	Tree	Sitetype	Year	Dek	GK_E	GK_N	Zone	Site	Month	TMean	TWinter	Tsummer	RFMean	RFAnnual	RFSummer	RFWinter	NoTrees	Weight	Precipitation	DaysAfterPrecip	id	RelBiomass	SR_ZOTU_All	SR_OTU_All	Richness_Unrarefied	Richness_qPCRrarefied	Haplotypes_per_OTU	SR_Lepidoptera	SR_Acari	SR_Araneae	SR_Coleoptera	SR_Collembola	SR_Diptera	SR_Hemiptera	SR_Hymenoptera	SR_Neuroptera	SR_Psocoptera	SR_Other	PD	Terbuthylazine-desethyl	Lindane	Terbuthylazine	Chlorthalonil	Fenpropimorph	Carbetamide	Metazachlor	Pyrimethanil
Bu2_	1201	NP	Buche	NP	1992	2000	4566750	5268800	4	Gries_oberhalb_Schloss	8	59	-30	143	157.333	1888	216.5	90.5	15	7500	Regen	3.26667	Bu2	-3.63147	62	45	62	45.3602	1.17647	14	12	3	1	1	5	5	2	1	1	0	5.39565	0	1	0	0	0	0	0	0
Bu3_	1201	NP	Buche	NP	1998	2000	4566750	5268800	4	Gries_oberhalb_Schloss	9	59	-11	124.5	174.333	2092	249	62.5	17	7500	Regen	1	Bu3	-3.90052	112	90	107	73.3314	1.44444	15	15	5	3	0	21	6	19	4	2	0	8.15494	0	1	0	0	0	0	0	0
Bu4_	1201	NP	Buche	NP	2000	2010	4566750	5268800	4	Gries_oberhalb_Schloss	8	67	-27	120.5	177.667	2132	259	225.5	15	2700	NA	NA	Bu4	-3.78242	60	51	64	49.3297	1.27273	7	13	4	0	1	6	4	10	2	3	1	5.99994	0	1	0	0	0	0	0	0
Bu5_	1201	NP	Buche	NP	2002	2010	4566750	5268800	4	Gries_oberhalb_Schloss	8	67	-16	127	194.333	2332	362.5	119	15	2700	NA	NA	Bu5	-3.69824	72	49	65	50.016	1.5	11	11	2	1	0	13	2	7	1	1	0	4.99564	0	0	0	0	1	0	0	0
Bu6_	1201	NP	Buche	NP	2004	2010	4566750	5268800	4	Gries_oberhalb_Schloss	8	56	-28	126	164.417	1973	242	201	15	2250	NA	NA	Bu6	-4.25406	71	51	63	44.2895	1.2	10	12	5	2	0	8	3	6	4	1	0	5.63035	0	0	0	0	1	0	0	0
Bu7_	1201	NP	Buche	NP	2006	2010	4566750	5268800	4	Gries_oberhalb_Schloss	8	60	-60.5	128.5	163.333	1960	266	130.5	15	2250	Nieselregen	0	Bu7	-4.43817	77	59	89	62.2919	1.35294	14	13	1	0	0	8	7	9	5	1	1	6.29985	1	0	0	0	0	0	0	0
Bu8_	1201	NP	Buche	NP	2008	2010	4566750	5268800	4	Gries_oberhalb_Schloss	8	60	-17	123.5	143.75	1725	239.5	89.5	15	2250	Regen	1	Bu8	-4.29303	72	53	71	46.8331	1.15385	9	15	3	2	0	12	5	4	2	1	0	5.79544	1	0	0	0	0	0	0	0
Bu9_	1201	NP	Buche	NP	2010	2020	4566750	5268800	4	Gries_oberhalb_Schloss	8	49	-53	129.5	149.583	1795	334	94.5	15	2250	Regen	0.666667	Bu9	-2.72394	106	77	111	84.4677	1.5	15	16	6	4	1	12	6	12	4	1	0	7.95908	1	0	0	0	0	0	0	0
Bu10_	1201	NP	Buche	NP	2012	2020	4566750	5268800	4	Gries_oberhalb_Schloss	8	57	-55.5	131	149.25	1791	213.5	190	15	2250	Regen	1	Bu10	-4.77004	57	49	68	51.0195	1.30769	7	10	4	1	1	10	4	9	1	2	0	5.49097	1	0	0	0	0	0	0	0
Bu11_	1201	NP	Buche	NP	2014	2020	4566750	5268800	4	Gries_oberhalb_Schloss	8	68	-10	118.5	138.75	1665	259	74.5	15	1125	Regen	0.666667	Bu11	-3.8562	83	62	87	59.2733	1.33333	10	15	3	2	2	10	5	12	2	1	0	6.52027	1	0	0	0	0	0	0	0
Bu14_	1201	NP	Buche	NP	2016	2020	4566750	5268800	4	Gries_oberhalb_Schloss	8	62	-13	131	157.333	1888	238	192	15	1125	Regen	1.66667	Bu14	-3.78382	84	65	73	54.7562	1.46154	6	11	5	1	2	23	3	10	2	2	0	6.52877	1	0	0	0	0	0	0	0
Bu16_	1201	NP	Buche	NP	2018	2020	4566750	5268800	4	Gries_oberhalb_Schloss	8	70	-34.5	143	132.667	1592	171.5	156.5	15	1125	Regen	5.66667	Bu16	-4.24338	65	53	65	48.8259	1.21429	7	12	2	1	1	9	2	14	1	3	1	5.73889	1	0	0	0	0	0	0	0
Bu18_	3103	Agrar	Buche	Agrar	1989	2000	3582900	5997600	3	Ostseite_(Belauer_See)	8	94	42.5	163.5	65.9167	791	155.5	36.5	16	11200	NA	NA	Bu18	-3.47733	86	67	83	66.9306	1.22727	15	10	9	4	0	8	4	9	1	5	2	7.18902	0	1	0	0	2	0	1	0
Bu22_	3103	Agrar	Buche	Agrar	1999	2000	3582900	5997600	3	Ostseite_(Belauer_See)	9	96	23	177.5	73.1667	878	70.5	67	15	3000	Regen	6.4	Bu22	-3.9038	111	83	104	79.2485	1.88889	18	10	4	2	3	22	5	12	2	4	1	8.23209	1	1	2	0	1	0	2	0
Bu23_	3103	Agrar	Buche	Agrar	2001	2010	3582900	5997600	3	Ostseite_(Belauer_See)	8	88	15	180	72.5	870	84	43.5	15	3000	Regen	3.2	Bu23	-4.15593	52	39	50	35.0445	1	9	10	1	2	0	7	2	4	0	3	1	5.1459	1	0	2	0	0	0	0	0
Bu24_	3103	Agrar	Buche	Agrar	2003	2010	3582900	5997600	3	Ostseite_(Belauer_See)	8	92	-2	189.5	48.1667	578	37	39	15	3000	Regen	40	Bu24	-4.02736	107	80	93	68.424	1.52381	15	15	6	5	1	14	7	11	3	2	1	8.51691	1	1	1	0	2	0	0	0
Bu25_	3103	Agrar	Buche	Agrar	2005	2010	3582900	5997600	3	Ostseite_(Belauer_See)	8	91	19.5	167.5	61.5	738	94.5	62	15	3000	Nieselregen	0	Bu25	-3.45491	118	88	104	76.4488	1.2963	16	11	9	1	0	28	6	11	2	3	1	8.68308	1	1	2	0	2	0	1	0
Bu126_	3103	Agrar	Buche	Agrar	2007	2010	3582900	5997600	3	Ostseite_(Belauer_See)	9	99	44	167.5	82.6667	992	109.5	116.5	15	3000	Regen	1	Bu126	-3.80626	110	77	91	63.4023	1.75	16	11	7	2	1	14	5	11	2	5	3	7.83634	2	0	2	0	2	0	1	0
Bu27_	3103	Agrar	Buche	Agrar	2009	2010	3582900	5997600	3	Ostseite_(Belauer_See)	9	91	5.5	178.5	61.9167	743	78	39	15	2250	Regen	1.66667	Bu27	-4.35881	51	39	54	41.4498	1.28571	12	8	5	0	1	6	2	1	0	3	1	4.69538	1	0	2	0	1	0	2	0
Bu28_	3103	Agrar	Buche	Agrar	2011	2020	3582900	5997600	3	Ostseite_(Belauer_See)	9	93	9	164.5	72.4167	869	149.5	58	15	2250	Regen	1	Bu28	-3.68815	124	91	113	73.1719	1.63158	14	15	8	0	4	17	7	20	0	3	3	9.27922	2	0	2	1	2	0	2	0
Bu29_	3103	Agrar	Buche	Agrar	2013	2020	3582900	5997600	3	Ostseite_(Belauer_See)	9	87	5.5	178.5	64.4167	773	37	64.5	15	2250	Regen	1	Bu29	-4.05091	90	63	78	59.0671	1.45	11	11	8	0	2	10	4	12	1	2	2	7.49858	2	0	2	1	1	0	1	0
Bu30_	3103	Agrar	Buche	Agrar	2015	2020	3582900	5997600	3	Ostseite_(Belauer_See)	8	96	24	175	72.8333	874	91.5	74.5	15	1125	Regen	3	Bu30	-4.16181	121	92	107	70.3946	1.56522	19	19	3	4	1	21	7	11	2	5	0	9.09739	1	0	2	0	0	0	0	0
Bu32_	3103	Agrar	Buche	Agrar	2017	2020	3582900	5997600	3	Ostseite_(Belauer_See)	8	94	14.5	164	84.6667	1016	98	54.5	15	1125	Regen	2	Bu32	-3.55807	75	57	66	50.3406	1.5	12	15	2	1	0	7	4	6	2	7	1	6.55602	1	0	2	0	0	0	0	0
Bu125_	3902	Agrar	Buche	Agrar	1991	2000	3.58149e+06	5.98635e+06	3	Ostseite_(Belauer_See)	8	84	5	178.5	67.4167	809	57	49	20	7500	NA	NA	Bu125	-3.53838	117	81	87	75.8075	1.33333	14	7	6	4	0	10	6	18	3	3	10	7.684	1	1	1	0	2	0	1	0
Bu34_	5102	NP	Buche	NP	1989	2000	4604838	5426434	4	Hang_Hochwalddistriktsteig	9	48	-14	125	109.167	1310	134	104.5	30	7500	NA	NA	Bu34	-4.2473	57	42	60	39.804	1.7	10	8	3	1	4	8	3	1	1	2	1	4.91105	0	2	0	0	0	0	0	0
Bu35_	5102	NP	Buche	NP	1992	2000	4604838	5426434	4	Hang_Hochwalddistriktsteig	8	49	-23.5	151.5	119.833	1438	96.5	103	15	7500	Starkregen	0.2	Bu35	-4.07642	108	83	105	60.9024	1.71429	23	17	2	4	6	15	8	5	0	1	2	8.47121	0	2	0	0	0	0	0	0
Bu36_	5102	NP	Buche	NP	1998	2000	4604838	5426434	4	Hang_Hochwalddistriktsteig	8	45	-8.5	126.5	140.667	1688	119	56	15	7500	Regen	1	Bu36	-4.81482	102	78	100	68.9139	1.64706	17	10	4	0	4	24	4	11	1	1	2	7.5325	0	1	0	0	0	0	0	0
Bu37_	5102	NP	Buche	NP	1999	2000	4604838	5426434	4	Hang_Hochwalddistriktsteig	8	45	-39	134.5	130.417	1565	88.5	220.5	15	2700	Nieselregen	1	Bu37	-4.23862	70	45	54	41.7489	1.73333	14	5	1	1	3	7	4	5	1	2	2	5.25732	0	1	0	0	0	0	0	0
Bu38_	5102	NP	Buche	NP	2000	2010	4604838	5426434	4	Hang_Hochwalddistriktsteig	8	55	-33	123.5	131.167	1574	159.5	147.5	15	2700	Regen	2	Bu38	-4.0971	75	52	64	58.2281	1.5	9	6	3	2	1	12	6	7	3	2	1	5.55211	0	1	0	0	0	0	0	0
Bu39_	5102	NP	Buche	NP	2001	2010	4604838	5426434	4	Hang_Hochwalddistriktsteig	8	44	-23	138	157.417	1889	153	87	15	2700	Starkregen	1	Bu39	-4.42203	46	38	43	30.3733	1.25	5	10	2	0	4	7	4	0	1	3	2	4.82941	0	0	0	0	0	0	0	0
Bu40_	5102	NP	Buche	NP	2002	2010	4604838	5426434	4	Hang_Hochwalddistriktsteig	8	54	-15.5	139.5	179.25	2151	277	205	15	2700	Starkregen	1	Bu40	-5.16447	54	36	44	31.421	1.66667	11	8	0	0	0	8	4	3	1	1	0	4.08019	0	0	0	0	0	0	0	0
Bu41_	5102	NP	Buche	NP	2003	2010	4604838	5426434	4	Hang_Hochwalddistriktsteig	9	52	-49	159.5	94.75	1137	75.5	132	15	2700	Regen	0	Bu41	-4.20312	58	42	48	37.6559	1.58333	12	10	1	1	1	5	3	7	1	1	0	5.18151	0	0	0	0	0	0	0	0
Bu42_	5102	NP	Buche	NP	2004	2010	4604838	5426434	4	Hang_Hochwalddistriktsteig	8	39	-41	131	123.417	1481	118	192	15	2700	Regen	1	Bu42	-3.95657	58	41	46	36.8617	1.57143	15	7	1	0	1	7	5	3	2	0	0	4.22019	0	0	0	0	0	0	0	0
Bu43_	5102	NP	Buche	NP	2005	2010	4604838	5426434	4	Hang_Hochwalddistriktsteig	8	38	-51	122.5	127.25	1527	170	204.5	15	2700	Regen	0	Bu43	-4.31876	63	50	71	42.6706	1.53846	16	11	1	2	1	7	4	4	0	2	2	5.09118	0	0	0	0	0	0	0	0
Bu44_	5102	NP	Buche	NP	2006	2010	4604838	5426434	4	Hang_Hochwalddistriktsteig	8	46	-64.5	135	138.75	1665	143.5	146.5	15	2700	Regen	1	Bu44	-3.89867	72	55	66	46.2398	1.1875	16	10	4	0	0	10	4	6	3	1	1	5.8906	0	0	0	0	0	0	0	0
Bu45_	5102	NP	Buche	NP	2007	2010	4604838	5426434	4	Hang_Hochwalddistriktsteig	8	51	1.5	127.5	150.167	1802	146.5	206	15	2700	Regen	11	Bu45	-4.34228	69	51	64	51.2735	1.4	11	10	1	1	2	7	6	6	4	2	1	5.80794	0	0	0	0	0	0	0	0
Bu46_	5102	NP	Buche	NP	2008	2010	4604838	5426434	4	Hang_Hochwalddistriktsteig	8	48	-12	130	117.917	1415	129	118.5	15	2700	Starkregen	3	Bu46	-4.98878	55	41	55	38.9124	1.5	16	9	0	0	2	4	2	2	3	1	2	4.60639	0	0	0	0	0	0	0	0
Bu47_	5102	NP	Buche	NP	2009	2010	4604838	5426434	4	Hang_Hochwalddistriktsteig	8	46	-53	137.5	139.5	1674	150.5	96	15	2250	Regen	0	Bu47	-4.19411	60	42	53	37.5948	1.5625	10	11	1	1	0	10	3	2	3	1	0	4.89533	0	0	0	0	0	0	0	0
Bu48_	5102	NP	Buche	NP	2010	2020	4604838	5426434	4	Hang_Hochwalddistriktsteig	8	35	-55	136.5	120	1440	210.5	92	15	2250	Regen	0	Bu48	-4.61812	101	78	93	63.8734	1.72222	21	13	2	2	1	18	6	7	3	3	2	7.53007	0	0	0	0	0	0	0	0
Bu49_	5102	NP	Buche	NP	2011	2020	4604838	5426434	4	Hang_Hochwalddistriktsteig	8	50	-37.5	126	111.25	1335	157.5	98	15	2250	Regen	2	Bu49	-5.05776	53	40	48	41.5028	1.58824	11	8	1	1	0	6	6	5	1	1	0	4.53344	0	0	0	0	0	0	0	0
Bu50_	5102	NP	Buche	NP	2012	2020	4604838	5426434	4	Hang_Hochwalddistriktsteig	8	45	-53	137	133.5	1602	175	177.5	15	2250	Regen	1	Bu50	-4.33444	66	47	59	45.7244	1.375	15	13	3	0	0	1	5	5	1	2	2	5.47236	0	0	0	0	0	0	0	0
Bu51_	5102	NP	Buche	NP	2013	2020	4604838	5426434	4	Hang_Hochwalddistriktsteig	8	43	-40.5	147.5	114.25	1371	85.5	151	15	2250	Regen	2	Bu51	-3.794	84	64	72	51.7274	1.35714	17	12	1	2	0	10	6	9	4	2	1	6.84466	0	0	0	0	0	0	0	0
Bu53_	5102	NP	Buche	NP	2014	2020	4604838	5426434	4	Hang_Hochwalddistriktsteig	8	58	-7.5	128	108.417	1301	211	43	15	1125	Regen	1	Bu53	-5.64149	74	55	73	50.7757	1.53846	11	11	0	1	3	11	7	6	2	2	1	6.34363	0	0	0	0	0	0	0	0
Bu54_	5102	NP	Buche	NP	2016	2020	4604838	5426434	4	Hang_Hochwalddistriktsteig	8	50	-15.5	136	119.417	1433	129.5	186	15	1125	Nieselregen	0	Bu54	-4.36176	92	71	98	69.1214	1.47368	19	20	2	1	1	16	1	5	3	2	1	7.34209	0	0	0	0	0	0	0	0
Bu56_	5102	NP	Buche	NP	2018	2020	4604838	5426434	4	Hang_Hochwalddistriktsteig	8	60	-31.5	154	112.583	1351	67	116.5	15	1125	Regen	3	Bu56	-5.20848	59	41	52	32.5683	1.53846	13	11	0	0	0	6	3	2	2	3	1	4.87097	0	0	0	0	0	0	0	0
Bu59_	12102	NP	Buche	NP	1993	2000	3612801	5745546	3	Oberes_Ilseeinzugsgebiet_(Buche)	8	71	4.5	129.5	92.6667	1112	125.5	118	15	7500	Starkregen	1.8	Bu59	-2.87433	115	84	98	74.9085	1.52381	12	19	6	1	2	19	7	11	2	2	3	8.85816	0	1	0	0	0	0	0	0
Bu60_	12102	NP	Buche	NP	1996	2000	3612801	5745546	3	Oberes_Ilseeinzugsgebiet_(Buche)	8	59	-26.5	142	74.0833	889	90	52	15	4500	Regen	1.4	Bu60	-3.46913	85	72	91	70.2479	1.375	10	15	7	2	3	18	4	6	2	4	1	8.25088	0	1	0	0	0	0	0	0
Bu61_	12102	NP	Buche	NP	1997	2000	3612801	5745546	3	Oberes_Ilseeinzugsgebiet_(Buche)	9	76	1.5	164	87	1044	138	87	15	4500	Regen	1.4	Bu61	-5.33377	75	55	68	37.8371	1.22727	5	18	2	2	4	10	2	5	2	2	3	6.65122	0	1	0	0	0	0	0	0
Bu62_	12102	NP	Buche	NP	1998	2000	3612801	5745546	3	Oberes_Ilseeinzugsgebiet_(Buche)	8	75	17.5	136	100.5	1206	103.5	90.5	15	3150	Regen	0	Bu62	-4.18755	140	102	132	76.2404	1.6	12	21	4	2	3	24	5	18	4	8	1	10.3007	0	1	0	0	0	0	0	0
Bu63_	12102	NP	Buche	NP	1999	2000	3612801	5745546	3	Oberes_Ilseeinzugsgebiet_(Buche)	9	80	-3	157	73.5833	883	71	100	15	3150	Regen	1	Bu63	-4.08338	83	63	75	56.7093	1.36842	7	19	3	1	5	14	4	4	4	0	2	7.21207	0	1	0	0	0	0	0	0
Bu64_	12102	NP	Buche	NP	2000	2010	3612801	5745546	3	Oberes_Ilseeinzugsgebiet_(Buche)	8	84	0.5	139	83.5	1002	100.5	112	15	3000	Regen	1.2	Bu64	-3.24401	111	89	124	71.6053	1.4375	12	17	5	1	4	23	5	15	2	2	3	9.5441	0	1	0	0	0	0	0	0
Bu65_	12102	NP	Buche	NP	2001	2010	3612801	5745546	3	Oberes_Ilseeinzugsgebiet_(Buche)	8	76	-1	162	90.4167	1085	92.5	86	15	3000	Regen	2	Bu65	-3.7207	56	44	54	43.4765	1.28571	5	15	4	2	0	4	3	4	1	4	2	5.67169	0	0	0	0	0	0	0	0
Bu66_	12102	NP	Buche	NP	2002	2010	3612801	5745546	3	Oberes_Ilseeinzugsgebiet_(Buche)	8	81	17.5	164	112.667	1352	193.5	146	15	3000	Regen	3	Bu66	-3.80485	101	79	94	71.0017	1.4	10	17	3	1	5	16	4	17	2	4	0	8.25573	0	0	0	0	0	0	0	0
Bu67_	12102	NP	Buche	NP	2003	2010	3612801	5745546	3	Oberes_Ilseeinzugsgebiet_(Buche)	8	82	-16	172.5	63.0833	757	56.5	77.5	15	3000	NA	NA	Bu67	-5.65162	74	57	68	50.2933	1.35294	8	19	1	0	1	11	4	10	1	2	0	6.2769	0	0	0	0	0	0	0	0
Bu68_	12102	NP	Buche	NP	2004	2010	3612801	5745546	3	Oberes_Ilseeinzugsgebiet_(Buche)	8	74	-10.5	152	79.4167	953	112	130	15	3000	Regen	0	Bu68	-2.76373	110	90	109	85.9615	1.33333	14	16	4	4	2	22	10	10	4	3	1	8.71803	0	0	0	0	0	0	0	0
Bu69_	12102	NP	Buche	NP	2005	2010	3612801	5745546	3	Oberes_Ilseeinzugsgebiet_(Buche)	8	76	-16	145.5	75.5833	907	79	124.5	15	3000	NA	NA	Bu69	-2.68483	107	89	107	83.046	1.31818	12	16	9	1	3	19	4	17	3	5	0	9.1977	0	0	0	0	0	0	0	0
Bu71_X	12102	NP	Buche	NP	2007	2010	3612801	5745546	3	Oberes_Ilseeinzugsgebiet_(Buche)	8	84	17	147	122.167	1466	150.5	155	15	2250	Regen	3	Bu71X	-4.0124	91	72	91	69.5127	1.5	10	15	4	1	0	16	8	14	1	1	2	7.19845	0	0	0	0	0	0	0	0
Bu72_	12102	NP	Buche	NP	2008	2010	3612801	5745546	3	Oberes_Ilseeinzugsgebiet_(Buche)	9	80	18.5	153.5	81	972	99	121	15	2250	Regen	0.666667	Bu72	-5.55337	92	72	82	57.6129	1.38889	14	17	4	2	0	16	4	10	1	3	1	7.93896	0	0	0	0	0	0	0	0
Bu73_	12102	NP	Buche	NP	2009	2010	3612801	5745546	3	Oberes_Ilseeinzugsgebiet_(Buche)	8	78	-17.5	160.5	79.1667	950	75	64.5	15	2250	Regen	2	Bu73	-4.45244	98	78	86	62.8482	1.38095	13	16	0	0	0	22	8	14	1	2	2	7.15543	0	0	0	0	0	0	0	0
Bu74_	12102	NP	Buche	NP	2010	2020	3612801	5745546	3	Oberes_Ilseeinzugsgebiet_(Buche)	8	63	-38	164.5	78.1667	938	110	66	15	2250	Regen	1	Bu74	-4.39256	133	100	122	75.463	1.3913	13	19	6	1	1	25	7	20	5	0	3	9.04464	0	0	0	0	0	0	0	0
Bu75_	12102	NP	Buche	NP	2011	2020	3612801	5745546	3	Oberes_Ilseeinzugsgebiet_(Buche)	8	87	-2.5	145.5	59.3333	712	98	65.5	15	2250	Starkregen	0	Bu75	-4.56677	123	97	122	74.9358	1.5	11	19	4	4	6	20	7	21	2	1	2	9.78946	0	0	0	0	0	0	0	0
Bu76_	12102	NP	Buche	NP	2012	2020	3612801	5745546	3	Oberes_Ilseeinzugsgebiet_(Buche)	9	76	-25.5	154.5	66.25	795	86.5	113.5	15	2250	Regen	3.66667	Bu76	-4.09946	104	71	92	60.3067	1.57692	13	16	7	2	3	14	4	7	1	3	1	7.65228	0	0	0	0	0	0	0	0
Bu77_	12102	NP	Buche	NP	2013	2020	3612801	5745546	3	Oberes_Ilseeinzugsgebiet_(Buche)	8	71	-28	166.5	72.6667	872	50.5	90	15	2250	Nieselregen	0.333333	Bu77	-3.68409	104	77	99	70.015	1.4	15	19	4	0	1	11	4	15	3	4	1	8.17179	0	0	0	0	0	0	0	0
Bu79_	12102	NP	Buche	NP	2014	2020	3612801	5745546	3	Oberes_Ilseeinzugsgebiet_(Buche)	8	91	15	154	76	912	120	52.5	15	1125	Starkregen	1	Bu79	-4.32286	112	82	103	66.0616	1.47619	19	16	5	0	3	11	5	19	3	1	0	7.48748	0	0	0	0	0	0	0	0
Bu80_	12102	NP	Buche	NP	2016	2020	3612801	5745546	3	Oberes_Ilseeinzugsgebiet_(Buche)	8	83	-3	160	62.8333	754	37	110	15	1125	Regen	5.33333	Bu80	-4.31872	125	85	105	68.4639	1.35714	18	19	4	0	0	14	4	16	1	7	2	8.16056	0	0	0	0	0	0	0	0
Bu82_	12102	NP	Buche	NP	2018	2020	3612801	5745546	3	Oberes_Ilseeinzugsgebiet_(Buche)	8	90	-20.5	181	55	660	26	87.5	15	1125	Regen	2.33333	Bu82	-4.85526	103	78	93	60.2324	1.73684	10	18	2	3	1	19	5	14	2	2	2	8.09954	0	0	0	0	0	0	0	0
Bu84_	14102	Forst	Buche	Forst	1999	2000	3539070	5735249	3	SievershausenBuche	8	81	4.5	162.5	99.5	1194	88.5	129	30	2700	Regen	2	Bu84	-5.16019	87	59	79	51.0959	1.42105	16	11	4	1	2	11	4	8	1	1	0	6.43742	1	2	1	0	0	0	1	0
Bu85_	14102	Forst	Buche	Forst	2001	2010	3539070	5735249	3	SievershausenBuche	8	74	5	166	111.083	1333	75.5	96.5	18	4500	Regen	0.333333	Bu85	-3.83329	42	30	41	30.9753	1.625	7	10	1	0	0	2	1	6	1	2	0	3.84754	1	2	1	0	0	0	0	0
Bu86_	14102	Forst	Buche	Forst	2003	2010	3539070	5735249	3	SievershausenBuche	8	77	-21.5	176	80.3333	964	56.5	106.5	18	2700	NA	NA	Bu86	-4.60412	80	55	78	51.3826	1.8125	12	11	7	0	0	7	3	12	1	2	0	6.00093	1	0	1	0	0	0	0	0
Bu87a_	14102	Forst	Buche	Forst	2005	2010	3539070	5735249	3	SievershausenBuche	8	74	-8	146	99.9167	1199	108.5	129	18	2700	Regen	2	Bu87a	-5.22992	64	49	62	41.8693	1.375	16	11	3	1	2	9	2	3	0	2	0	5.33076	1	0	1	0	0	0	0	0
Bu88_	14102	Forst	Buche	Forst	2007	2010	3539070	5735249	3	SievershausenBuche	8	82	27.5	146.5	140.25	1683	144.5	177	18	2700	Regen	5	Bu88	-4.15241	94	71	90	63.6092	1.73684	20	13	3	2	1	11	5	11	2	2	1	6.85566	1	0	1	0	0	0	0	0
Bu89_	14102	Forst	Buche	Forst	2009	2010	3539070	5735249	3	SievershausenBuche	9	76	-22	161.5	94.25	1131	97.5	79	18	2250	Regen	2.33333	Bu89	-4.66124	88	63	85	44.9672	1.47826	15	16	1	1	1	10	6	9	1	3	0	7.08156	1	0	1	0	0	0	0	0
Bu90_	14102	Forst	Buche	Forst	2011	2020	3539070	5735249	3	SievershausenBuche	8	80	1	150	79	948	102	87.5	18	2250	Regen	0	Bu90	-3.81312	105	84	102	74.8737	1.45	18	14	4	4	4	16	4	15	2	3	0	8.15384	1	0	1	0	0	0	0	0
Bu91_	14102	Forst	Buche	Forst	2013	2020	3539070	5735249	3	SievershausenBuche	8	71	-13	166	84.1667	1010	44	94	18	2250	Nieselregen	1	Bu91	-4.72656	90	65	89	36.5518	1.58824	18	18	2	0	1	6	2	10	3	4	1	6.97531	1	0	1	0	0	0	0	0
Bu124_	14102	Forst	Buche	Forst	2015	2020	3539070	5735249	3	SievershausenBuche	8	82	5.5	171.5	90.8333	1090	119	92.5	18	1170	Regen	2.33333	Bu124	-5.07367	55	39	39	34.5417	1.7	9	12	1	0	0	4	1	4	2	5	1	4.94558	1	0	1	0	0	0	0	0
Bu92_	14102	Forst	Buche	Forst	2017	2020	3539070	5735249	3	SievershausenBuche	8	81	-7.5	157	108.583	1303	194	77	18	1170	Regen	1.66667	Bu92	-4.75563	75	56	73	39.8088	1.4	14	14	2	1	0	8	5	7	2	3	0	6.30004	1	0	1	0	0	0	0	0
BuX_	15102	Forst	Buche	Forst	2001	2010	2626657	5446382	2	MoosbachtalBuche	8	101	35.5	191	88.5	1062	64	91.5	30	10500	Starkregen	4	BuX	-5.08491	143	99	120	74.0101	1.59091	25	16	7	2	1	15	5	15	4	4	5	9.77014	0	1	0	0	0	0	0	0
Bu94_	15102	Forst	Buche	Forst	2003	2010	2626657	5446382	2	MoosbachtalBuche	8	106	5.5	206	53	636	46	70.5	20	10500	NA	NA	Bu94	-4.95655	98	70	81	43.3856	1.75	20	15	4	0	3	9	3	12	2	1	1	6.89459	0	1	0	0	0	0	0	0
Bu95_	15102	Forst	Buche	Forst	2005	2010	2626657	5446382	2	MoosbachtalBuche	8	101	10	179.5	56.5	678	63	65	20	2200	Regen	2	Bu95	-6.30584	92	65	71	52.586	1.8	18	13	1	0	1	11	2	15	1	2	1	6.25684	0	1	0	0	0	0	0	1
Bu96_	15102	Forst	Buche	Forst	2007	2010	2626657	5446382	2	MoosbachtalBuche	8	107	53.5	175.5	72.9167	875	85	98.5	20	2200	Regen	1	Bu96	-6.29418	81	62	73	56.8349	1.47368	17	10	2	1	0	11	3	8	3	6	1	6.21192	0	1	0	0	0	0	0	1
Bu97_	15102	Forst	Buche	Forst	2009	2010	2626657	5446382	2	MoosbachtalBuche	8	102	-0.5	191.5	70.5833	847	87	54.5	20	2200	Regen	3.6	Bu97	-5.08026	143	95	129	81.769	1.80952	14	15	3	2	2	35	2	14	3	4	1	8.6464	0	0	0	0	0	0	0	0
Bu98_	15102	Forst	Buche	Forst	2011	2020	2626657	5446382	2	MoosbachtalBuche	8	111	25	179	55.4167	665	81.5	50.5	20	2200	Regen	2	Bu98	-4.20177	115	87	108	67.1842	1.38889	11	13	7	3	2	15	6	21	5	3	1	9.00275	0	0	0	0	0	0	0	0
Bu99_	15102	Forst	Buche	Forst	2013	2020	2626657	5446382	2	MoosbachtalBuche	9	99	6.5	202.5	77.4167	929	54.5	50.5	20	2200	NA	NA	Bu99	-3.54136	152	102	124	86.8203	1.6087	24	24	7	1	0	13	7	18	3	3	2	9.92823	0	1	0	0	0	0	0	0
Bu101_	15102	Forst	Buche	Forst	2015	2020	2626657	5446382	2	MoosbachtalBuche	8	113	19.5	217	47.25	567	33	65.5	20	1200	Regen	2.5	Bu101	-4.72593	86	66	73	54.6851	1.57895	16	19	2	1	0	11	2	8	2	4	1	7.34325	0	1	0	0	0	0	0	0
Bu103_	15102	Forst	Buche	Forst	2017	2020	2626657	5446382	2	MoosbachtalBuche	8	109	17	197.5	67.0833	805	72.5	43.5	20	1200	Regen	2.6	Bu103	-3.24519	129	90	103	76.8067	1.57895	21	19	6	2	1	10	3	19	4	4	1	8.7852	0	1	0	0	0	0	0	0
Bu104_	16102	Agrar	Buche	Agrar	2000	2010	3679585	5375054	3	ScheyernBuche	8	95	9.5	170	85.3333	1024	122.5	68.5	30	10500	Regen	0	Bu104	-4.33589	125	93	112	68.0408	1.26087	19	15	6	3	2	13	6	22	2	3	2	9.08928	1	1	1	0	0	0	0	0
Bu105_	16102	Agrar	Buche	Agrar	2002	2010	3679585	5375054	3	ScheyernBuche	8	94	18.5	178.5	88.3333	1060	115.5	34.5	20	2500	Regen	0	Bu105	-4.39784	164	118	145	89.9027	1.4	24	25	5	2	9	21	7	16	4	3	2	11.1768	1	1	1	0	0	0	0	0
Bu106_	16102	Agrar	Buche	Agrar	2004	2010	3679585	5375054	3	ScheyernBuche	8	86	4.5	180.5	63.6667	764	79.5	94	20	2500	NA	NA	Bu106	-4.40244	120	84	105	71.7365	1.77778	12	18	3	1	1	21	6	16	2	2	2	8.2935	1	0	1	0	0	0	0	0
Bu122_	16102	Agrar	Buche	Agrar	2006	2010	3679585	5375054	3	ScheyernBuche	8	87	-27.5	181.5	63.1667	758	90.5	37	20	2500	Regen	0	Bu122	-5.8467	106	78	83	67.371	1.40909	14	18	3	4	4	12	3	15	1	2	2	7.63787	1	0	2	0	0	0	0	0
Bu108_	16102	Agrar	Buche	Agrar	2008	2010	3679585	5375054	3	ScheyernBuche	8	91	26.5	176	69.1667	830	104.5	39.5	20	2500	Regen	2.5	Bu108	-5.01488	95	69	88	57.2204	1.23529	15	14	4	0	1	13	3	14	2	2	1	7.5349	1	0	1	0	0	0	0	0
Bu109_	16102	Agrar	Buche	Agrar	2010	2020	3679585	5375054	3	ScheyernBuche	8	78	-21	182	74.9167	899	150	41.5	20	2200	Regen	0.25	Bu109	-4.46715	124	88	97	77.5691	1.46429	23	19	2	3	1	17	2	15	3	2	1	8.10792	1	0	1	0	0	0	0	0
Bu110_	16102	Agrar	Buche	Agrar	2012	2020	3679585	5375054	3	ScheyernBuche	8	89	-17.5	184.5	71.3333	856	109	60	20	2200	Starkregen	1	Bu110	-4.73186	64	45	62	49.3387	1.21429	14	11	4	1	0	5	3	5	0	2	0	4.90774	1	0	1	0	0	0	0	0
Bu112_	16102	Agrar	Buche	Agrar	2014	2020	3679585	5375054	3	ScheyernBuche	8	99	25	172	71.3333	856	134	35	20	1100	Regen	0.75	Bu112	-5.25017	122	88	95	73.377	1.34783	17	15	5	5	3	14	5	16	3	2	3	8.95031	1	0	2	0	0	0	0	0
Bu113_	16102	Agrar	Buche	Agrar	2015	2020	3679585	5375054	3	ScheyernBuche	8	98	-1.5	208.5	59.0833	709	34	57	20	1200	Starkregen	1	Bu113	-4.55896	89	64	67	59.0145	1.375	12	16	1	2	3	11	5	9	2	2	1	6.67966	1	0	1	0	0	0	0	0
Bu115_	16102	Agrar	Buche	Agrar	2017	2020	3679585	5375054	3	ScheyernBuche	8	92	-12.5	188.5	73.1667	878	121	39.5	20	1200	Regen	1.75	Bu115	-5.19824	46	34	34	30.4228	1.16667	6	9	0	2	0	8	3	5	1	0	0	3.77152	1	0	1	0	0	0	0	0
Bu117a_	18101	Forst	Buche	Forst	2014	2020	4568923	5891634	4	StechlinRuppiner_Heide	8	102	21	184.5	48.9167	587	79	29.5	15	1100	Regen	1	Bu117a	-4.7745	109	82	102	66.2631	1.4375	21	14	7	0	1	16	3	12	2	3	3	8.14407	1	0	1	0	0	0	0	0
Bu119_	18101	Forst	Buche	Forst	2016	2020	4568923	5891634	4	StechlinRuppiner_Heide	8	96	11	181	43.0833	517	45	45.5	15	1100	Nieselregen	0	Bu119	-4.19282	120	77	99	64.6851	1.7	20	14	4	1	1	12	3	15	1	4	2	7.12704	1	0	1	0	0	0	0	0
Bu120_	18101	Forst	Buche	Forst	2018	2020	4568923	5891634	4	StechlinRuppiner_Heide	8	103	3.5	203.5	33.8333	406	39	44	15	1100	Regen	8	Bu120	-4.71255	86	54	63	48.925	1.5	11	8	1	1	0	11	5	12	3	2	0	5.54741	1	0	1	0	0	0	0	0
Fi6_	1200	NP	Fichte	NP	1998	2000	4572252	5269048	4	WEG_Wimbachtal	5	54	-7	128	183.667	2204	331.5	57.5	30	10500	Regen	1.33333	Fi6	-3.9298	39	28	34	23.292	1.375	6	6	1	0	0	4	8	2	0	1	0	3.75305	0	1	0	0	1	0	0	0
Fi9_	1201	NP	Fichte	NP	2004	2010	4566750	5268800	4	Gries_oberhalb_Schloss	5	52	-28	150.5	164.417	1973	163.5	201	18	2700	Regen	2.66667	Fi9	-2.54733	38	31	41	29.128	1.6	9	6	0	1	0	3	8	4	0	0	0	3.58259	1	1	0	0	1	0	0	0
Fi10_	1201	NP	Fichte	NP	2006	2010	4566750	5268800	4	Gries_oberhalb_Schloss	5	55	-60.5	115.5	163.333	1960	380.5	130.5	20	2400	Regen	1.25	Fi10	-3.59347	43	32	39	28.6	1.2	5	5	0	2	2	8	8	2	0	0	0	3.80688	1	1	0	0	1	0	0	0
Fi16_	1201	NP	Fichte	NP	2018	2020	4566750	5268800	4	Gries_oberhalb_Schloss	4	66	-34.5	136	132.667	1592	265	156.5	20	2200	Regen	1	Fi16	-4.03876	63	39	59	39.286	1.44444	5	6	1	3	2	10	9	3	0	0	0	4.42123	1	0	0	0	1	0	0	0
unk_F_	2201	Forst	Fichte	Forst	1987	2000	2555546	5453944	2	Warndt_1_Fuchsborn	2	93	-9.5	179.5	73.5833	883	74.5	49	15	11900	Schnee	1	unkF_	-4.58039	31	17	19	16.9125	1.5	1	3	2	1	0	1	5	3	0	1	0	2.94725	0	2	0	0	0	0	0	0
unk_E_	2201	Forst	Fichte	Forst	1989	2000	2555546	5453944	2	Warndt_1_Fuchsborn	3	109	33	181	63.4167	761	66.5	41.5	15	6000	NA	NA	unkE_	-4.0306	60	44	45	43.1422	1.45455	6	10	6	3	2	1	10	5	0	1	0	5.17991	NA	NA	NA	NA	NA	NA	NA	NA
Fi20_	2201	Forst	Fichte	Forst	1991	2000	2555546	5453944	2	Warndt_1_Fuchsborn	2	98	9.5	192.5	49.5	594	43	51	15	7350	NA	NA	Fi20	-4.15919	43	30	36	21.7421	1.85714	5	5	2	0	0	4	8	5	0	1	0	4.06707	1	2	0	0	0	0	0	0
Fi21_	2201	Forst	Fichte	Forst	1993	2000	2555546	5453944	2	Warndt_1_Fuchsborn	3	101	24	200.5	71.0833	853	77.5	49.5	17	26400	Schnee	2	Fi21	-3.14491	51	31	43	34.4954	1.54545	4	9	1	1	0	3	6	6	0	0	1	4.58933	1	2	0	0	0	0	0	0
Fi22_	2201	Forst	Fichte	Forst	1994	2000	2555546	5453944	2	Warndt_1_Fuchsborn	3	113	31.5	181	65.25	783	50	80	15	7500	Nieselregen	0	Fi22	-3.32251	42	31	36	26.6808	1.625	7	7	1	1	3	6	1	2	1	2	0	3.5766	1	2	0	0	0	0	0	0
Fi23_	2201	Forst	Fichte	Forst	1995	2000	2555546	5453944	2	Warndt_1_Fuchsborn	3	106	43	211	75.0833	901	44.5	120	15	6750	7	6	Fi23	-4.11797	44	28	37	25.8603	2	4	6	3	1	1	6	4	2	0	1	0	3.66667	1	2	0	0	0	0	0	0
Fi24_	2201	Forst	Fichte	Forst	1996	2000	2555546	5453944	2	Warndt_1_Fuchsborn	3	92	4	208	55.1667	662	74.5	39.5	16	7500	Schnee	1	Fi24	-4.00059	27	16	27	18.7674	1.83333	3	5	0	0	0	1	3	3	0	1	0	2.65276	1	2	0	0	0	0	0	0
Fi25_	2201	Forst	Fichte	Forst	1997	2000	2555546	5453944	2	Warndt_1_Fuchsborn	3	105	20	182	65.25	783	68	76	15	3000	Nieselregen	0	Fi25	-4.50732	25	19	31	22.8714	1.16667	2	5	0	1	1	3	6	1	0	0	0	2.86535	1	2	0	0	0	0	0	0
Fi26_	2201	Forst	Fichte	Forst	1998	2000	2555546	5453944	2	Warndt_1_Fuchsborn	2	103	40	197.5	64.9167	779	45	35	15	3277	Nieselregen	1	Fi26	-4.43934	17	14	20	16.941	1.33333	3	4	0	1	0	2	1	2	0	0	1	2.11783	1	2	0	0	0	0	0	0
Fi27_	2201	Forst	Fichte	Forst	1999	2000	2555546	5453944	2	Warndt_1_Fuchsborn	3	106	31	182.5	74.5	894	45	69.5	15	3000	Regen	1	Fi27	-4.83655	40	25	38	22.2306	1.4	7	7	1	0	0	2	4	2	0	2	0	3.47234	1	2	0	0	0	0	0	0
Fi28_	2201	Forst	Fichte	Forst	2000	2010	2555546	5453944	2	Warndt_1_Fuchsborn	3	109	37.5	191.5	84.9167	1019	65	59.5	15	3000	Nieselregen	2	Fi28	-4.73754	54	37	44	31.5577	2	9	6	1	1	0	4	11	4	0	1	0	3.9875	1	2	0	0	0	0	0	0
Fi29_	2201	Forst	Fichte	Forst	2001	2010	2555546	5453944	2	Warndt_1_Fuchsborn	3	105	35	172	82.25	987	115	84.5	15	3000	Regen	1	Fi29	-3.49537	63	44	54	43.4594	1.41667	5	10	7	1	2	9	3	3	1	3	0	5.39904	1	2	0	0	0	0	0	0
Fi30_	2201	Forst	Fichte	Forst	2002	2010	2555546	5453944	2	Warndt_1_Fuchsborn	3	110	40.5	196.5	74.75	897	83	93.5	15	3000	Regen	4	Fi30	-4.59067	66	46	56	36.4704	1.53846	6	7	5	1	2	10	8	4	0	1	2	5.09554	1	2	0	0	0	0	0	0
Fi31_	2201	Forst	Fichte	Forst	2003	2010	2555546	5453944	2	Warndt_1_Fuchsborn	3	111	9	188	50.5	606	71.5	57	15	3000	Regen	2	Fi31	-3.75824	61	42	59	33.31	1.5	4	11	2	1	3	3	10	7	0	0	1	5.69311	1	1	0	0	0	0	0	0
Fi33_	2201	Forst	Fichte	Forst	2005	2010	2555546	5453944	2	Warndt_1_Fuchsborn	3	105	16	185.5	54.9167	659	101	57	15	2700	Regen	1	Fi33	-3.82323	43	33	45	33.3632	1.45455	5	4	3	1	0	4	11	2	0	2	1	3.88641	1	1	0	0	0	0	0	0
Fi34_	2201	Forst	Fichte	Forst	2006	2010	2555546	5453944	2	Warndt_1_Fuchsborn	4	109	7	181	66.5833	799	61.5	37	15	3000	Regen	1	Fi34	-3.51683	31	24	30	21.6744	1.6	0	6	1	2	0	3	6	2	0	2	2	3.43357	1	1	0	0	0	0	0	0
Fi35_	2201	Forst	Fichte	Forst	2007	2010	2555546	5453944	2	Warndt_1_Fuchsborn	3	110	58	199.5	70.5	846	100	91.5	15	3000	NA	NA	Fi35	-2.85492	71	48	55	40.3773	1.63636	8	14	4	2	2	7	3	4	0	2	2	5.80971	1	2	0	0	0	0	0	0
Fi36_	2201	Forst	Fichte	Forst	2008	2010	2555546	5453944	2	Warndt_1_Fuchsborn	4	104	48	176	62.8333	754	89	57	15	2700	NA	NA	Fi36	-3.59199	33	26	27	22.5004	1.33333	6	5	2	0	0	2	4	3	0	3	1	3.7577	1	1	0	0	0	0	0	0
Fi37_	2201	Forst	Fichte	Forst	2009	2010	2555546	5453944	2	Warndt_1_Fuchsborn	3	106	6.5	184	59.4167	713	95.5	47	15	2250	Regen	1	Fi37	-3.9644	52	35	43	32.6481	1.66667	5	4	3	1	0	3	11	5	0	2	1	4.19995	1	1	0	0	0	0	0	0
Fi38_	2201	Forst	Fichte	Forst	2010	2020	2555546	5453944	2	Warndt_1_Fuchsborn	3	94	5	193.5	68.5833	823	64.5	68	15	2250	Nieselregen	1	Fi38	-3.73694	57	41	51	29.7029	1.63636	4	11	2	1	0	4	5	9	0	3	2	5.95774	1	1	0	0	0	0	0	0
Fi39_	2201	Forst	Fichte	Forst	2011	2020	2555546	5453944	2	Warndt_1_Fuchsborn	3	112	30	192.5	52.1667	626	80.5	44.5	15	2250	Regen	5	Fi39	-5.10557	38	27	33	22.0286	1.5	1	6	1	1	2	5	4	3	0	4	0	3.73413	1	0	0	0	0	0	0	0
Fi40_	2201	Forst	Fichte	Forst	2012	2020	2555546	5453944	2	Warndt_1_Fuchsborn	3	105	12.5	176	62.4167	749	69.5	56	15	2250	Regen	3	Fi40	-5.02981	34	23	28	19.5823	1.4	2	6	1	1	2	2	3	3	0	3	0	3.43829	1	0	0	0	0	0	0	0
Fi41_	2201	Forst	Fichte	Forst	2013	2020	2555546	5453944	2	Warndt_1_Fuchsborn	3	99	8	190.5	74.3333	892	52	44.5	15	2250	NA	2	Fi41	-5.40413	31	23	26	20.676	1.375	0	8	2	0	0	3	4	4	0	2	0	3.67354	1	0	0	0	0	0	0	0
Fi42_	2201	Forst	Fichte	Forst	2014	2020	2555546	5453944	2	Warndt_1_Fuchsborn	3	117	51	200	61	732	45	64.5	15	2250	NA	4	Fi42	-5.74464	18	12	15			0	5	0	0	0	2	1	1	0	2	1	2.28866	1	0	0	0	0	0	0	0
Fi43_	2201	Forst	Fichte	Forst	2016	2020	2555546	5453944	2	Warndt_1_Fuchsborn	3	106	38.5	213	66.9167	803	37.5	106	15	2250	Schnee	1	Fi43	-5.06497	76	53	69	46.2281	1.46154	2	14	3	3	4	7	5	7	0	7	1	6.46359	1	0	0	0	0	0	0	0
Fi44_	2201	Forst	Fichte	Forst	2018	2020	2555546	5453944	2	Warndt_1_Fuchsborn	3	118	27.5	194.5	62.4167	749	79.5	89	15	2250	Schnee	3	Fi44	-5.49856	46	30	38	27.7211	1.53846	6	7	3	2	0	3	5	3	0	1	0	3.72975	1	0	0	0	0	0	0	0
Fi45_	2301	Forst	Fichte	Forst	1995	2000	2571510	5461680	2	Oberes_Steinbachtal	4	102	39.5	203.5	90.8333	1090	50.5	146.5	30	7500	Regen	4	Fi45	-5.10605	21	14	23	14.5691	1.75	3	3	4	0	0	1	1	2	0	0	0	1.78348	1	2	0	0	0	0	0	0
Fi46_	2301	Forst	Fichte	Forst	1996	2000	2571510	5461680	2	Oberes_Steinbachtal	3	87	1	202	64.5	774	80	49	15	7500	Nieselregen	0	Fi46	-4.5656	34	22	27	21.854	1.8	3	7	3	1	0	2	4	1	0	1	0	3.09234	1	2	0	0	0	0	0	0
Fi47_	2301	Forst	Fichte	Forst	1997	2000	2571510	5461680	2	Oberes_Steinbachtal	3	100	14.5	176.5	73.9167	887	81.5	87.5	15	3000	Nieselregen	2	Fi47	-5.40604	25	18	27	20.999	1.57143	5	4	2	0	0	1	3	2	0	1	0	2.10467	1	2	0	0	0	0	1	0
Fi48_	2301	Forst	Fichte	Forst	2000	2010	2571510	5461680	2	Oberes_Steinbachtal	3	106	35.5	187	90.9167	1091	83	63	15	3000	Nieselregen	3	Fi48	-3.89366	42	30	36	10.8881	1.4	6	11	0	0	0	4	5	4	0	0	0	3.68928	1	2	0	0	0	0	1	0
Fi49_	2301	Forst	Fichte	Forst	2001	2010	2571510	5461680	2	Oberes_Steinbachtal	3	101	31.5	168	91.75	1101	131	96.5	15	3000	Regen	1	Fi49	-4.71102	32	22	36	27.49	1.8	2	7	1	1	1	2	5	3	0	0	0	3.27451	1	2	0	0	0	0	1	0
Fi50_	2301	Forst	Fichte	Forst	2002	2010	2571510	5461680	2	Oberes_Steinbachtal	3	106	36.5	191.5	89.75	1077	94.5	115	15	3000	Regen	3	Fi50	-4.97967	37	25	31	20.7427	1.71429	2	7	1	1	1	2	7	3	0	1	0	3.58782	1	2	0	0	0	0	1	0
Fi51_	2301	Forst	Fichte	Forst	2003	2010	2571510	5461680	2	Oberes_Steinbachtal	3	105	6.5	183.5	55	660	95	66	15	3000	NA	NA	Fi51	-4.68582	47	33	41	31.5737	1.57143	6	5	2	1	1	1	10	7	0	0	0	4.01967	1	1	0	0	0	0	1	0
Fi53_	2301	Forst	Fichte	Forst	2005	2010	2571510	5461680	2	Oberes_Steinbachtal	3	101	13	180	58.5833	703	115.5	65.5	15	2700	NA	NA	Fi53	-4.71508	30	26	31	25.3972	1.375	2	2	5	1	0	2	9	3	1	0	1	3.48167	0	0	0	0	0	0	1	0
Fi54_	2301	Forst	Fichte	Forst	2006	2010	2571510	5461680	2	Oberes_Steinbachtal	4	104	4	175.5	72.4167	869	63.5	46.5	15	2700	Regen	3	Fi54	-3.72893	66	37	45	33.5316	1.69231	8	2	4	2	0	4	8	8	0	1	0	4.21843	0	0	0	0	0	0	1	0
Fi55_	3102	Agrar	Fichte	Agrar	1991	2000	3581529	5997751	3	Fichtenbestand_Westufer	3	87	8	170	63.0833	757	81.5	39.5	9	7500	NA	NA	Fi55	-2.29777	60	46	60	45.9176	1.46154	10	4	5	4	0	9	6	6	0	1	1	4.74467	0	2	0	0	1	0	1	0
Fi56_	3102	Agrar	Fichte	Agrar	1993	2000	3581529	5997751	3	Fichtenbestand_Westufer	3	82	18	179.5	75.4167	905	70	82.5	15	7500	Nieselregen	0.4	Fi56	-3.52848	45	31	45	34.2558	1.58333	15	3	2	2	0	2	2	5	0	0	0	3.30162	1	1	1	0	1	0	1	0
Fi57_	3102	Agrar	Fichte	Agrar	1997	2000	3581529	5997751	3	Fichtenbestand_Westufer	3	90	14.5	168.5	64.9167	779	59	48.5	18	3000	Schnee	1	Fi57	-4.19911	88	55	66	52.2402	1.55	19	5	4	2	1	5	10	8	0	1	0	5.58485	1	1	2	0	1	0	1	0
Fi58_	3102	Agrar	Fichte	Agrar	1999	2000	3581529	5997751	3	Fichtenbestand_Westufer	3	97	23.5	155.5	72.0833	865	77	66	15	3715	Regen	1	Fi58	-4.32702	57	35	46	34.9035	1.66667	15	6	1	1	0	2	2	6	0	2	0	3.55988	1	1	1	0	0	0	1	0
Fi59_	3102	Agrar	Fichte	Agrar	2001	2010	3581529	5997751	3	Fichtenbestand_Westufer	4	89	15.5	158	71.6667	860	54	44	15	3000	NA	4	Fi59	-3.55752	61	39	48	34.7882	1.88889	9	7	4	4	1	5	3	4	0	1	1	4.93509	1	1	2	0	0	0	1	0
Fi60_	3102	Agrar	Fichte	Agrar	2003	2010	3581529	5997751	3	Fichtenbestand_Westufer	3	93	-1.5	187	47.75	573	141.5	38.5	15	3000	Regen	1	Fi60	-3.3913	69	50	61	47.5847	1.44444	17	12	2	2	2	4	5	5	0	1	0	4.67683	1	0	1	0	0	0	1	0
Fi61_	3102	Agrar	Fichte	Agrar	2005	2010	3581529	5997751	3	Fichtenbestand_Westufer	3	92	20	170	60.5833	727	91	61.5	15	2700	Regen	2	Fi61	-3.1823	88	60	73	55.0805	1.3125	13	8	7	4	1	10	7	7	0	3	0	6.58052	1	0	2	1	0	0	1	0
Fi62_	3102	Agrar	Fichte	Agrar	2007	2010	3581529	5997751	3	Fichtenbestand_Westufer	3	100	44.5	189.5	81.25	975	102	113.5	15	2200	Regen	4	Fi62	-3.07674	85	56	70	53.136	1.76471	13	12	4	1	2	10	7	3	0	4	0	6.22331	1	0	2	0	0	0	0	0
Fi63_	3102	Agrar	Fichte	Agrar	2009	2010	3581529	5997751	3	Fichtenbestand_Westufer	3	92	6	172.5	61.25	735	116	38.5	15	2250	Nieselregen	3	Fi63	-1.89156	82	48	60	51.4213	1.5	11	10	4	1	4	6	5	4	0	3	0	5.12087	1	1	2	0	0	0	1	0
Fi64_	3102	Agrar	Fichte	Agrar	2011	2020	3581529	5997751	3	Fichtenbestand_Westufer	4	94	9.5	183.5	71.25	855	86	57	15	2250	Regen	1	Fi64	-3.5614	69	43	53	46.4058	1.5625	9	8	3	3	2	7	4	5	0	2	0	4.83532	1	0	2	0	1	0	1	0
unk_C_	3102	Agrar	Fichte	Agrar	2013	2020	3581529	5997751	3	Fichtenbestand_Westufer	3	88	6	168.5	63.4167	761	84.5	63	15	2250	Schnee	4	unkC_	-5.12797	56	41	42	35.4087	1.61538	15	5	2	1	0	3	6	6	0	2	1	4.56077	1	0	2	0	1	0	1	0
Fi66_	3102	Agrar	Fichte	Agrar	2015	2020	3581529	5997751	3	Fichtenbestand_Westufer	4	96	24.5	180	71.8333	862	77	72.5	15	2250	Regen	1	Fi66	-2.01163	67	48	60	47.2029	1.30769	7	11	3	3	1	10	4	5	0	4	0	5.67018	1	0	2	0	1	0	1	0
Fi67_	3102	Agrar	Fichte	Agrar	2017	2020	3581529	5997751	3	Fichtenbestand_Westufer	3	95	15	171.5	83.0833	997	67.5	53	15	2250	Nieselregen	12	Fi67	-3.3207	108	76	101	61.1592	1.64706	21	12	2	5	1	13	7	10	1	4	0	7.1287	NA	NA	NA	NA	NA	NA	NA	NA
unk_B_	3902	Agrar	Fichte	Agrar	1987	2000	3.58149e+06	5.98635e+06	3	Forstamt_Neumuenster_Ost	3	73	-25.5	158	73.9167	887	86.5	41.5	15	9770	NA	NA	unkB_	-3.91205	76	49	49	42.7737	1.9375	19	6	3	1	0	9	4	6	0	1	0	4.36555	0	2	0	0	1	0	1	0
unk_A_	3902	Agrar	Fichte	Agrar	1989	2000	3.58149e+06	5.98635e+06	3	Forstamt_Neumuenster_Ost	2	95	42.5	160.5	63.8333	766	73.5	37.5	15	6750	Regen	3	unkA_	-4.80587	65	44	47	39.2991	1.41667	12	4	1	0	3	9	7	7	1	0	0	4.57875	0	2	0	0	1	0	1	0
Fi70_	3902	Agrar	Fichte	Agrar	1991	2000	3.58149e+06	5.98635e+06	3	Forstamt_Neumuenster_Ost	3	87	5	168.5	67.4167	809	83	49	15	7500	NA	NA	Fi70	-3.55069	52	35	48	34.7406	1.83333	12	4	4	2	1	4	6	1	0	1	0	4.12201	1	2	1	0	1	0	1	0
Fi71_	5101	NP	Fichte	NP	1990	2000	4605183	5426499	4	Hochlagenplateau	4	47	-9	122	119.417	1433	137	151	15	14000	NA	NA	Fi71	-4.66609	42	23	28	19.9	2.42857	8	7	0	1	0	2	3	2	0	0	0	2.74592	0	2	0	0	0	0	0	0
Fi72_	5101	NP	Fichte	NP	1992	2000	4605183	5426499	4	Hochlagenplateau	5	49	-25.5	135.5	119.833	1438	138	106.5	15	7500	Starkregen	0.6	Fi72	-3.48494	87	44	58	37.781	2.35714	10	16	0	3	0	7	5	3	0	0	0	4.37609	0	2	0	0	0	0	0	0
Fi73_	5101	NP	Fichte	NP	1998	2000	4605183	5426499	4	Hochlagenplateau	5	45	-10	127	140.667	1688	155	58	15	11400	Nieselregen	0	Fi73	-4.77381	109	62	76	48.0077	2.05556	19	17	2	4	1	9	6	4	0	0	0	5.79076	0	2	0	0	0	0	0	0
Fi74_	5101	NP	Fichte	NP	1999	2000	4605183	5426499	4	Hochlagenplateau	5	45	-41	123.5	130.417	1565	122	229	15	3000	Nieselregen	3	Fi74	-4.2366	74	38	47	34.0783	2.41667	8	10	1	1	2	7	6	3	0	0	0	4.06054	0	2	0	0	0	0	0	0
Fi75_	5101	NP	Fichte	NP	2000	2010	4605183	5426499	4	Hochlagenplateau	5	55	-35	131.5	131.167	1574	90.5	152.5	15	3000	Regen	1	Fi75	-4.68912	83	50	71	44.5061	2	11	8	2	1	1	7	10	9	0	0	1	4.94326	0	1	0	0	0	0	0	0
Fi77_	5101	NP	Fichte	NP	2002	2010	4605183	5426499	4	Hochlagenplateau	5	54	-17	135	179.25	2151	156.5	212.5	16	3200	Regen	2	Fi77	-3.41788	53	29	36	24.03	2.5	7	10	0	1	1	5	2	2	0	0	1	3.1765	0	1	0	0	0	0	0	0
Fi78_	5101	NP	Fichte	NP	2003	2010	4605183	5426499	4	Hochlagenplateau	5	52	-50.5	136.5	94.75	1137	283.5	136.5	15	3000	Regen	0.8	Fi78	-2.8421	105	60	77	55.3142	1.93333	14	15	0	1	2	12	3	12	0	1	0	5.08508	0	0	0	0	0	0	0	0
Fi79_	5101	NP	Fichte	NP	2004	2010	4605183	5426499	4	Hochlagenplateau	5	39	-43	156.5	123.417	1481	77	199	15	2700	Regen	6	Fi79	-3.00232	60	30	35	28.1928	2.14286	18	5	0	0	0	3	1	3	0	0	0	2.57479	NA	NA	NA	NA	NA	NA	NA	NA
Fi80_	5101	NP	Fichte	NP	2005	2010	4605183	5426499	4	Hochlagenplateau	5	38	-53	128	127.25	1527	121	211.5	15	2700	Regen	1	Fi80	-3.0071	42	22	33	21.5074	2	7	7	0	0	0	4	1	3	0	0	0	2.69882	NA	NA	NA	NA	NA	NA	NA	NA
Fi81_	5101	NP	Fichte	NP	2006	2010	4605183	5426499	4	Hochlagenplateau	5	46	-66.5	119.5	138.75	1665	174	152.5	15	2700	Regen	2	Fi81	-1.72351	92	46	56	42.6777	2.42857	17	9	2	0	1	7	5	5	0	0	0	4.13864	0	0	0	0	0	0	0	0
Fi82_	5101	NP	Fichte	NP	2007	2010	4605183	5426499	4	Hochlagenplateau	4	51	-0.5	132	150.167	1802	147	215.5	15	2700	Regen	1	Fi82	-2.40452	83	48	67	42.8211	2.1	18	8	1	1	1	4	8	6	0	1	0	4.48811	0	0	0	0	0	0	0	0
Fi83_	5101	NP	Fichte	NP	2008	2010	4605183	5426499	4	Hochlagenplateau	5	48	-14	124.5	117.917	1415	149	123.5	15	2700	Regen	1	Fi83	-3.26107	64	32	55	32.5409	2.41667	10	6	0	1	1	5	5	3	0	1	0	3.36134	0	0	0	0	0	0	0	0
Fi84_	5101	NP	Fichte	NP	2009	2010	4605183	5426499	4	Hochlagenplateau	5	46	-55	127	139.5	1674	130.5	99.5	15	2250	Regen	1	Fi84	-2.81165	71	41	53	35.5987	2.45455	16	8	1	1	2	5	3	5	0	0	0	3.87523	0	0	0	0	0	0	0	0
Fi85_	5101	NP	Fichte	NP	2010	2020	4605183	5426499	4	Hochlagenplateau	5	35	-57	134.5	120	1440	154	96	15	2250	Starkregen	0			110	62				17	12	1	2	2	11	8	9	0	0	0	6.30356	0	0	0	0	0	0	0	0
Fi86_	5101	NP	Fichte	NP	2011	2020	4605183	5426499	4	Hochlagenplateau	5	50	-39.5	133.5	111.25	1335	216	101.5	15	2250	Schnee	0	Fi86	-3.35446	74	43	58	42.3386	1.58824	17	6	1	0	0	5	7	7	0	0	0	4.01598	0	0	0	0	0	0	0	0
Fi87_	5101	NP	Fichte	NP	2012	2020	4605183	5426499	4	Hochlagenplateau	5	45	-55	123	133.5	1602	160.5	184.5	15	2250	Regen	2	Fi87	-2.88806	58	31	37	27.0665	2	14	7	0	0	0	1	5	4	0	0	0	3.00261	0	0	0	0	0	0	0	0
Fi88_	5101	NP	Fichte	NP	2013	2020	4605183	5426499	4	Hochlagenplateau	5	43	-42.5	134	114.25	1371	179	157	15	2250	Regen	1	Fi88	-3.19208	34	20	31	16.6273	1.85714	5	4	1	0	1	4	2	2	1	0	0	2.37238	0	0	0	0	0	0	0	0
Fi89_	5101	NP	Fichte	NP	2014	2020	4605183	5426499	4	Hochlagenplateau	5	58	-9.5	144.5	108.417	1301	87.5	44.5	15	2250	Schnee	0	Fi89	-3.83235	46	25	32	22.8182	1.55556	7	6	1	0	0	1	7	3	0	0	0	2.85201	0	0	0	0	0	0	0	0
Fi90_	5101	NP	Fichte	NP	2016	2020	4605183	5426499	4	Hochlagenplateau	5	50	-17.5	160	119.417	1433	47.5	193	15	2250	Regen	11	Fi90	-3.22433	69	37	62	37.7159	2	11	8	0	0	3	4	6	5	0	0	0	3.72294	0	0	0	0	0	0	0	0
Fi91_	5101	NP	Fichte	NP	2018	2020	4605183	5426499	4	Hochlagenplateau	4	60	-33.5	139	112.583	1351	128	121	15	2250	Regen	0	Fi91	-3.14387	77	45	50	37.3391	1.9375	14	8	3	0	1	4	7	6	1	0	1	4.88105	0	0	0	0	0	0	0	0
Fi92_	11200	Forst	Fichte	Forst	2015	2020	4536910	5730060	4	Duebener_Heide_Mitte	3	104	21	186	51.3333	616	82.5	36.5	30	3000	Regen	2	Fi92	-2.65828	92	59	77	48.4177	1.38889	14	13	6	1	1	5	9	8	0	1	1	6.16958	0	0	0	0	0	0	1	0
Fi93_	11200	Forst	Fichte	Forst	2016	2020	4536910	5730060	4	Duebener_Heide_Mitte	3	101	20	205	46.3333	556	101.5	55.5	15	2250	Regen	0	Fi93	-3.32022	53	36	45	29.533	1.57143	6	8	2	1	1	6	6	3	0	1	2	4.5734	0	0	0	0	0	0	1	0
Fi94_	11200	Forst	Fichte	Forst	2017	2020	4536910	5730060	4	Duebener_Heide_Mitte	3	101	2.5	191	57.75	693	46.5	45.5	15	2250	NA	1	Fi94	-2.21048	80	55	51	34	1.15	5	16	5	3	2	8	8	6	0	2	0	6.54612	0	0	0	0	0	0	1	0
Fi95_	11200	Forst	Fichte	Forst	2018	2020	4536910	5730060	4	Duebener_Heide_Mitte	3	110	10.5	187.5	31.25	375	98.5	30	15	2250	Regen	0	Fi95	-1.82333	78	51	67	51.548	1.57895	6	20	3	1	3	8	6	3	0	0	1	6.36545	0	0	0	0	0	0	1	0
Fi97_	12101	NP	Fichte	NP	1992	2000	3612817	5744680	3	Oberes_Ilseeinzugsgebiet_(Fichte)	5	74	13.5	159.5	98.6667	1184	51	75	18	7500	NA	NA	Fi97	-2.96687	62	43	29	22.9995	1.5	14	11	3	0	2	4	6	2	0	1	0	4.61255	1	2	0	0	0	0	0	0
Fi98_	12101	NP	Fichte	NP	1996	2000	3612753	5744303	3	Oberes_Ilseeinzugsgebiet_(_Fichte_)	5	53	-24.5	173	87	1044	68.5	50	15	3000	Nieselregen	1	Fi98	-2.2051	64	41	33	26.9941	1.625	11	13	1	1	1	5	6	3	0	0	0	4.63018	1	2	0	0	0	0	0	0
Fi99_	12101	NP	Fichte	NP	1997	2000	3612753	5744303	3	Oberes_Ilseeinzugsgebiet_(_Fichte_)	5	69	2	140.5	103	1236	97	87	15	3000	Tau	1	Fi99	-3.00739	75	44	40	32.8057	1.63158	10	13	1	1	1	1	10	5	1	1	0	5.04064	1	2	0	0	0	0	0	0
Fi100_	12101	NP	Fichte	NP	1998	2000	3612753	5744303	3	Oberes_Ilseeinzugsgebiet_(_Fichte_)	4	66	16	163.5	123.667	1484	142	91.5	15	3000	Starkregen	1	Fi100	-2.94907	48	33	33	14.9999	1.5	7	10	0	0	3	7	3	2	0	1	0	3.7317	1	2	0	0	0	0	0	0
Fi102_	12101	NP	Fichte	NP	2000	2010	3612753	5744303	3	Oberes_Ilseeinzugsgebiet_(_Fichte_)	4	75	-1	155	95.9167	1151	75	113	15	3000	Regen	4	Fi102	-2.98156	61	41	39	28.5683	1.6	5	10	1	0	1	5	12	6	0	1	0	4.30708	1	1	0	0	0	0	0	0
Fi104_	12101	NP	Fichte	NP	2002	2010	3612753	5744303	3	Oberes_Ilseeinzugsgebiet_(_Fichte_)	4	74	17	160	124.917	1499	97	153.5	15	3000	Regen	0	Fi104	-3.44767	49	33	21	16.968	1.4	8	10	2	1	1	2	4	2	0	3	0	4.06259	1	1	0	0	0	0	0	0
Fi105_	12101	NP	Fichte	NP	2003	2010	3612753	5744303	3	Oberes_Ilseeinzugsgebiet_(_Fichte_)	4	76	-15	163.5	72.4167	869	189.5	79.5	15	3000	Schnee	1.2	Fi105	-4.41311	37	24	24	23.4825	2	6	8	1	1	1	2	3	2	0	0	0	3.35631	1	1	0	0	0	0	0	0
Fi106_	12101	NP	Fichte	NP	2004	2010	3612753	5744303	3	Oberes_Ilseeinzugsgebiet_(_Fichte_)	4	66	-12	171	94.1667	1130	58.5	136	15	2250	Regen	2.13333	Fi106	-2.69596	37	27	28	26.0029	1.55556	8	8	2	0	1	2	4	2	0	0	0	3.55565	1	0	0	0	0	0	0	0
Fi107_	12101	NP	Fichte	NP	2005	2010	3612753	5744303	3	Oberes_Ilseeinzugsgebiet_(_Fichte_)	4	69	-17.5	150.5	86.6667	1040	118.5	127.5	15	2250	Regen	2	Fi107	-3.34689	42	27	27	25.139	1.44444	9	9	0	1	2	4	2	0	0	0	0	3.32206	1	0	0	0	0	0	0	0
Fi108_	12101	NP	Fichte	NP	2006	2010	3612753	5744303	3	Oberes_Ilseeinzugsgebiet_(_Fichte_)	4	77	-17.5	143.5	81.6667	980	80.5	79	15	2250	Regen	2.2	Fi108	-3.74027	49	33	34	31.5441	1.58333	9	10	1	0	2	3	6	1	0	1	0	4.13987	1	0	0	0	0	0	0	0
Fi109_	12101	NP	Fichte	NP	2007	2010	3612753	5744303	3	Oberes_Ilseeinzugsgebiet_(_Fichte_)	4	76	15	165.5	144.917	1739	93	166	15	2700	NA	NA	Fi109	-3.54636	71	47	51	42.5539	1.5	14	10	4	2	1	9	5	2	0	0	0	4.65719	1	0	0	0	0	0	0	0
Fi110_	12101	NP	Fichte	NP	2008	2010	3612753	5744303	3	Oberes_Ilseeinzugsgebiet_(_Fichte_)	4	72	17	145.5	99.1667	1190	157	132.5	15	2700	Regen	1.2	Fi110	-3.35552	37	24	26	22.8694	1.875	6	9	1	0	1	4	3	0	0	0	0	3.06327	1	0	0	0	0	0	0	0
Fi111_	12101	NP	Fichte	NP	2009	2010	3612753	5744303	3	Oberes_Ilseeinzugsgebiet_(_Fichte_)	4	70	-18	151.5	92.5	1110	102.5	64.5	15	2200	Regen	5.4	Fi111	-2.34611	84	46	50	38.9568	2.05882	13	9	0	1	2	9	6	6	0	0	0	4.00142	1	0	0	0	0	0	0	0
Fi112_	12101	NP	Fichte	NP	2010	2020	3612753	5744303	3	Oberes_Ilseeinzugsgebiet_(_Fichte_)	4	56	-38	159	92.1667	1106	76.5	66.5	15	2250	Regen	8	Fi112	-2.93057	63	41	51	39.5886	1.9	12	7	2	0	0	4	8	5	0	3	0	4.19609	1	0	0	0	0	0	0	0
Fi114_	12101	NP	Fichte	NP	2011	2020	3612753	5744303	3	Oberes_Ilseeinzugsgebiet_(_Fichte_)	4	80	-2.5	163.5	72.8333	874	113.5	72	15	2250	Regen	4.8	Fi114	-3.5849	72	45	55	41.3319	1.5625	12	11	1	1	2	5	8	4	0	1	0	4.81086	1	0	0	0	0	0	0	0
Fi115_	12101	NP	Fichte	NP	2012	2020	3612753	5744303	3	Oberes_Ilseeinzugsgebiet_(_Fichte_)	4	68	-26.5	143.5	82	984	101.5	123.5	15	2250	Schnee	0.8	Fi115	-4.29652	75	41	54	37.8226	1.8	9	12	2	2	1	3	5	4	0	3	0	4.93359	1	0	0	0	0	0	0	0
Fi116_	12101	NP	Fichte	NP	2013	2020	3612753	5744303	3	Oberes_Ilseeinzugsgebiet_(_Fichte_)	4	63	-29.5	153	87.1667	1046	89.5	96	15	2250	Regen	4	Fi116	-2.75024	64	33	36	29.9324	2	12	13	0	0	1	2	3	1	0	1	0	3.31563	1	0	0	0	0	0	0	0
Fi117_	12101	NP	Fichte	NP	2014	2020	3612753	5744303	3	Oberes_Ilseeinzugsgebiet_(_Fichte_)	4	84	13.5	165	88.5	1062	51.5	56	15	2250	Regen	4.6	Fi117	-2.64115	52	37	50	44.3896	1.38462	6	8	2	2	2	6	5	6	0	0	0	4.62473	1	0	0	0	0	0	0	0
Fi118_	12101	NP	Fichte	NP	2016	2020	3612753	5744303	3	Oberes_Ilseeinzugsgebiet_(_Fichte_)	4	74	-4	171	76.25	915	102.5	116	15	2250	Regen	3.2	Fi118	-2.58253	46	30	30	26.5598	1.55556	8	6	3	1	1	4	5	2	0	0	0	4.05471	1	0	0	0	0	0	0	0
Fi119_	12101	NP	Fichte	NP	2018	2020	3612753	5744303	3	Oberes_Ilseeinzugsgebiet_(_Fichte_)	4	82	-22	152.5	66.6667	800	181	94	12	2100	Regen	3.25	Fi119	-3.98149	49	28	30	24.5434	2.125	7	8	2	0	0	4	4	3	0	0	0	3.06461	1	0	0	0	0	0	0	0
Fi120_	14101	Forst	Fichte	Forst	1999	2000	3542055	5735707	3	SievershausenFichte	4	85	8.5	145	95.9167	1151	103.5	125	30	16553	Regen	4	Fi120	-3.43278	60	36	38	32.2518	1.9	11	4	2	1	3	10	3	1	0	1	0	3.40943	1	2	1	0	0	0	1	0
Fi121_	14101	Forst	Fichte	Forst	2001	2010	3542055	5735707	3	SievershausenFichte	4	77	8	147	105.917	1271	111	94.5	15	2700	Regen	1.2	Fi121	-2.97638	65	46	48	40.52	1.9	11	9	1	2	3	5	8	5	0	2	0	5.46728	1	2	1	0	0	0	1	0
Fi122_	14101	Forst	Fichte	Forst	2003	2010	3542055	5735707	3	SievershausenFichte	4	81	-18	165	77.6667	932	134	104	15	2250	Regen	3.6	Fi122	-2.25593	49	36	37	32.9059	1.5	6	8	3	0	1	5	7	4	0	2	0	4.20191	1	1	1	0	0	0	1	0
Fi123_	14101	Forst	Fichte	Forst	2005	2010	3542055	5735707	3	SievershausenFichte	4	78	-4.5	157.5	95.5833	1147	139	127	15	2700	NA	NA	Fi123	-3.17196	79	61	68	52.0076	1.38462	21	8	2	2	3	6	9	10	0	0	0	5.83322	1	1	2	0	0	0	1	0
Fi124_	14101	Forst	Fichte	Forst	2007	2010	3542055	5735707	3	SievershausenFichte	4	86	31.5	171	135.333	1624	110	176.5	15	2700	NA	NA	Fi124	-3.20764	120	72	78	63.8571	1.68421	17	9	3	0	3	13	14	12	0	1	0	6.97024	1	0	1	0	0	0	1	0
Fi125_	14101	Forst	Fichte	Forst	2009	2010	3542055	5735707	3	SievershausenFichte	4	79	-18.5	164	91.5833	1099	108	76	15	2250	Regen	1	Fi125	-3.38007	96	62	80	51.1344	1.53333	10	13	3	5	3	14	8	6	0	0	0	6.65335	1	0	1	0	0	0	1	0
Fi126_	14101	Forst	Fichte	Forst	2011	2020	3542055	5735707	3	SievershausenFichte	4	84	4	170	77.3333	928	109	85.5	15	2250	Regen	2	Fi126	-3.04575	97	62	75	51.4098	1.66667	12	11	5	0	5	9	12	8	0	0	0	6.16479	1	0	1	0	0	0	1	0
Fi127_	14101	Forst	Fichte	Forst	2013	2020	3542055	5735707	3	SievershausenFichte	4	75	-10	161.5	81.5833	979	90.5	91	15	2250	Regen	6	Fi127	-3.55948	75	47	60	42.6854	1.58333	12	6	5	0	3	7	9	3	0	2	0	4.76958	1	0	1	0	0	0	1	0
Fi128_	14101	Forst	Fichte	Forst	2015	2020	3542055	5735707	3	SievershausenFichte	4	86	9	160.5	88.25	1059	101	89.5	15	2250	Regen	4	Fi128	-3.98236	48	32	37	26.4777	1.33333	10	6	3	2	1	4	2	4	0	0	0	3.77323	1	0	1	0	0	0	1	0
Fi129_	14101	Forst	Fichte	Forst	2017	2020	3542055	5735707	3	SievershausenFichte	4	84	-4.5	166.5	105.333	1264	52	76	15	2250	Nieselregen	0	Fi129	-4.22611	58	39	45	33.3045	1.53846	11	5	1	2	1	8	6	4	0	1	0	4.0382	1	0	1	0	0	0	1	0
Fi130_	15101	Forst	Fichte	Forst	2001	2010	2626657	5446382	2	MoosbachtalFichte	3	101	35.5	171.5	88.5	1062	103.5	91.5	32	9000	Regen	1	Fi130	-2.86697	80	53	57	51.3166	1.66667	10	14	1	3	2	9	4	5	0	1	4	6.1005	0	1	0	0	0	0	0	0
Fi131_	15101	Forst	Fichte	Forst	2003	2010	2626657	5446382	2	MoosbachtalFichte	3	106	5.5	186.5	53	636	82.5	70.5	15	3000	NA	NA	Fi131	-3.2632	69	46	51	42.4942	1.26667	6	13	3	1	3	5	13	1	0	1	0	5.26576	0	1	0	0	0	0	0	0
Fi132_	15101	Forst	Fichte	Forst	2005	2010	2626657	5446382	2	MoosbachtalFichte	3	101	10	188.5	56.5	678	98.5	65	15	2700	NA	NA	Fi132	-2.96894	58	38	38	35.9769	1.27778	8	7	1	0	2	8	6	3	0	2	1	4.15121	0	1	0	0	0	0	0	0
Fi133_	15101	Forst	Fichte	Forst	2007	2010	2626657	5446382	2	MoosbachtalFichte	3	107	53.5	195.5	72.9167	875	91.5	98.5	15	2700	Regen	4	Fi133	-3.1234	83	50	53	49.1153	1.42857	8	13	4	3	2	8	5	4	0	1	2	6.18186	0	1	0	0	0	0	0	0
Fi135_	15101	Forst	Fichte	Forst	2011	2020	2626657	5446382	2	MoosbachtalFichte	4	111	25	190	55.4167	665	111.5	50.5	15	2250	Regen	0	Fi135	-3.3367	87	59	72	54.3751	1.41176	7	17	2	5	2	14	5	6	0	1	0	7.10132	0	1	0	0	0	0	0	0
Fi136_	15101	Forst	Fichte	Forst	2013	2020	2626657	5446382	2	MoosbachtalFichte	3	99	6.5	193.5	77.4167	929	54	50.5	15	2250	Regen	4	Fi136	-4.36512	31	22	25	15.9171	1.5	3	6	2	0	0	3	5	2	0	1	0	3.41143	NA	NA	NA	NA	NA	NA	NA	NA
Fi137_	15101	Forst	Fichte	Forst	2015	2020	2626657	5446382	2	MoosbachtalFichte	4	113	19.5	184	47.25	567	124.5	65.5	15	2250	Regen	3	Fi137	-2.66955	96	67	88	63.0887	1.5625	10	16	1	2	3	13	5	13	0	4	0	7.39966	0	0	0	0	0	0	0	0
Fi138_	15101	Forst	Fichte	Forst	2017	2020	2626657	5446382	2	MoosbachtalFichte	3	109	17	199.5	67.0833	805	29.5	43.5	15	2250	Nieselregen	5	Fi138	-4.41391	63	40	56	39.5073	1.46154	7	9	1	0	1	11	4	4	0	3	0	4.2414	0	0	0	0	0	0	0	0
Fi140_	16101	Agrar	Fichte	Agrar	2002	2010	3680146	5375181	3	ScheyernFichte	3	94	18.5	182.5	88.3333	1060	71.5	34.5	20	7000	Regen	1.7	Fi140	-2.94028	84	47	61	46.2888	1.83333	10	8	3	2	0	9	6	8	0	1	0	4.94267	1	0	1	0	0	0	0	0
Fi141_	16101	Agrar	Fichte	Agrar	2004	2010	3680146	5375181	3	ScheyernFichte	3	86	4.5	204	63.6667	764	44	94	20	3000	Nieselregen	5.4	Fi141	-2.25931	74	39	47	38.9014	1.625	4	6	3	5	1	5	6	4	0	2	3	4.50908	1	0	1	0	0	0	0	0
Fi142_	16101	Agrar	Fichte	Agrar	2006	2010	3680146	5375181	3	ScheyernFichte	4	87	-27.5	168	63.1667	758	142.5	37	20	3000	Schnee	1.3	Fi142	-3.53475	51	33	43	13.9999	1.4	8	9	2	0	1	4	5	4	0	0	0	4.34994	1	0	1	0	0	0	0	0
Fi143_	16101	Agrar	Fichte	Agrar	2008	2010	3680146	5375181	3	ScheyernFichte	4	91	26.5	173	69.1667	830	122	39.5	20	3000	Schnee	0.75	Fi143	-4.2465	107	77	79	47.8651	1.5	16	14	3	4	1	15	10	10	1	2	1	7.53249	1	0	2	0	0	0	0	0
Fi144_	16101	Agrar	Fichte	Agrar	2010	2020	3680146	5375181	3	ScheyernFichte	4	78	-21	184	74.9167	899	79.5	41.5	20	2200	Regen	2.1	Fi144	-3.75382	92	67	86	36.3094	1.41176	18	12	1	2	1	10	10	10	1	2	0	6.43918	1	0	2	0	0	0	0	0
Fi147_	16101	Agrar	Fichte	Agrar	2015	2020	3680146	5375181	3	ScheyernFichte	3	98	-1.5	172	59.0833	709	134	57	20	2200	Regen	1	Fi147	-3.92002	66	41	45	27.951	1.45455	13	7	0	3	1	3	6	6	0	1	1	4.76462	1	0	2	0	0	0	0	0
Ki4_	11200	Forst	Kiefer	Forst	1993	2000	4536910	5730060	4	Duebener_Heide_Mitte	3	89	10	205	55.5833	667	84	43	15	5400	Schnee	1.2	Ki4	-3.07715	128	82	95	69.9823	1.33333	12	6	4	4	0	27	13	15	0	0	1	6.8985	0	2	0	0	0	0	0	0
Ki5_	11200	Forst	Kiefer	Forst	1994	2000	4536910	5730060	4	Duebener_Heide_Mitte	3	101	14	165.5	67.5	810	67	43	15	5400	Regen	0.8	Ki5	-2.54561	133	82	96	75.9714	1.47368	16	3	4	2	1	37	6	13	0	0	0	6.09968	0	2	0	0	0	0	0	0
Ki6_	11200	Forst	Kiefer	Forst	1995	2000	4536910	5730060	4	Duebener_Heide_Mitte	3	93	26.5	205.5	55.4167	665	87.5	68.5	15	5400	Regen	2.2	Ki6	-3.04155	137	90	97	77.492	1.45833	13	6	4	4	0	38	14	10	0	0	1	7.09745	0	2	0	0	0	0	0	0
Ki7_X	11200	Forst	Kiefer	Forst	1996	2000	4536910	5730060	4	Duebener_Heide_Mitte	3	73	-34.5	201.5	43.75	525	59	20	15	5806	Tau	1.4	Ki7X	-2.98264	119	76	85	64.5493	1.75	10	4	7	2	0	36	7	10	0	0	0	5.82518	0	2	0	0	0	0	0	0
Ki8_	11200	Forst	Kiefer	Forst	1997	2000	4536910	5730060	4	Duebener_Heide_Mitte	3	93	9.5	171.5	46.3333	556	74	33	15	3150	Schnee	1	Ki8	-3.65643	111	69	82	59.7493	1.4375	10	4	4	2	1	23	13	9	2	0	1	5.9078	0	2	0	0	0	0	0	0
Ki9_	11200	Forst	Kiefer	Forst	1998	2000	4536910	5730060	4	Duebener_Heide_Mitte	3	97	40.5	195.5	58.5833	703	70	33	15	3000	Regen	1	Ki9	-2.69429	122	73	80	65.8097	1.38095	7	8	2	4	0	29	9	14	0	0	0	6.04362	0	1	0	0	0	0	0	0
Ki10_	11200	Forst	Kiefer	Forst	1999	2000	4536910	5730060	4	Duebener_Heide_Mitte	3	101	20.5	174	44.9167	539	62.5	50.5	15	3000	Regen	1	Ki10	-4.2171	165	97	109	74.2317	1.67857	11	9	3	0	0	44	12	16	1	0	1	7.6012	0	1	0	0	0	0	0	0
Ki11_	11200	Forst	Kiefer	Forst	2000	2010	4536910	5730060	4	Duebener_Heide_Mitte	3	105	28	190	57	684	41.5	74.5	15	3000	Regen	1.6	Ki11	-3.5807	121	75	92	63.2698	1.6	12	5	0	0	1	37	12	8	0	0	0	5.52561	NA	NA	NA	NA	NA	NA	NA	NA
Ki12_X	11200	Forst	Kiefer	Forst	2001	2010	4536910	5730060	4	Duebener_Heide_Mitte	3	93	15	175.5	64.4167	773	55.5	38	15	3000	Schnee	1.4	Ki12X	-4.24243	101	61	73	50.4752	1.31579	9	5	4	0	0	24	11	7	0	1	0	5.57864	0	1	0	0	0	0	0	0
Ki13_	11200	Forst	Kiefer	Forst	2002	2010	4536910	5730060	4	Duebener_Heide_Mitte	3	97	35	194	65.5833	787	64	56.5	15	3000	Regen	2.2	Ki13	-4.33198	112	70	76	55.1202	1.55	11	8	1	2	2	26	10	10	0	0	0	6.15741	0	1	0	0	0	0	0	0
Ki14_X	11200	Forst	Kiefer	Forst	2003	2010	4536910	5730060	4	Duebener_Heide_Mitte	3	97	-11.5	194.5	38.0833	457	118.5	43	15	3000	Regen	2.2	Ki14X	-3.95053	134	76	90	66.5129	1.63636	11	7	4	1	1	30	9	13	0	0	0	6.54181	0	1	0	0	0	0	0	0
Ki15_X	11200	Forst	Kiefer	Forst	2004	2010	4536910	5730060	4	Duebener_Heide_Mitte	3	94	11.5	205	53.6667	644	37.5	62	15	2700	Nieselregen	1.2	Ki15X	-3.98841	159	81	97	67.9732	1.70833	9	5	4	2	0	32	10	19	0	0	0	6.38173	0	1	0	0	0	0	0	0
Ki16_	11200	Forst	Kiefer	Forst	2005	2010	4536910	5730060	4	Duebener_Heide_Mitte	3	94	9.5	184	58.4167	701	70	60	15	2700	NA	NA	Ki16	-3.52678	110	69	82	59.9535	1.70588	7	5	2	1	0	36	10	7	0	1	0	5.48974	0	1	0	0	0	0	0	0
Ki17_	11200	Forst	Kiefer	Forst	2006	2010	4536910	5730060	4	Duebener_Heide_Mitte	3	100	-20.5	176.5	44.9167	539	114.5	51	15	2700	Regen	0.6	Ki17	-2.8676	126	79	93	70.1229	1.58333	11	9	3	2	1	33	7	13	0	0	0	6.91299	0	1	0	0	0	0	0	0
Ki18_	11200	Forst	Kiefer	Forst	2007	2010	4536910	5730060	4	Duebener_Heide_Mitte	3	104	47	198.5	72.9167	875	58	67.5	15	2700	Regen	3.2	Ki18	-3.78558	115	72	82	60.9313	1.42857	11	8	5	5	0	23	8	10	1	0	1	6.46852	0	1	0	0	0	0	0	0
Ki19_	11200	Forst	Kiefer	Forst	2008	2010	4536910	5730060	4	Duebener_Heide_Mitte	3	101	42.5	180	59.1667	710	106.5	54	15	2700	7	0.6	Ki19	-4.32111	132	83	98	71.0959	1.64	12	9	2	4	0	33	12	10	1	0	0	6.3559	0	0	0	0	0	0	0	0
Ki20_	11200	Forst	Kiefer	Forst	2009	2010	4536910	5730060	4	Duebener_Heide_Mitte	4	96	-8.5	186.5	55.8333	670	79.5	46	15	2250	Regen	1	Ki20	-3.24423	133	83	90	71.9518	1.63158	10	14	2	4	2	26	10	15	0	0	0	6.95553	0	0	0	0	0	0	0	0
Ki21_	11200	Forst	Kiefer	Forst	2010	2020	4536910	5730060	4	Duebener_Heide_Mitte	3	80	-28.5	192	70.4167	845	52.5	35.5	15	2250	Regen	0.6	Ki21	-3.68366	132	77	93	65.7733	1.68421	12	7	2	2	0	28	12	13	0	0	1	6.09132	0	0	0	0	0	0	0	0
Ki22_	11200	Forst	Kiefer	Forst	2011	2020	4536910	5730060	4	Duebener_Heide_Mitte	3	100	6.5	194.5	53	636	107.5	34.5	15	2250	Regen	14	Ki22	-3.74907	116	72	84	63.6695	1.47619	12	9	3	4	0	28	11	5	0	0	0	5.69549	0	0	0	0	0	0	0	0
Ki23_	11200	Forst	Kiefer	Forst	2012	2020	4536910	5730060	4	Duebener_Heide_Mitte	3	95	-4.5	176.5	47.5833	571	131.5	58	15	2250	Tau	0	Ki23	-3.38588	118	79	95	69.6674	1.22222	10	7	2	4	1	25	10	18	1	0	1	6.39083	0	0	0	0	0	0	0	0
Ki24_	11200	Forst	Kiefer	Forst	2013	2020	4536910	5730060	4	Duebener_Heide_Mitte	4	91	-2.5	186	65.5	786	54.5	61.5	15	2250	Regen	2.6	Ki24	-3.93453	99	68	83	61.9013	1.33333	8	8	3	5	0	26	9	6	1	1	1	6.15995	0	0	0	0	0	0	0	0
Ki25_	11200	Forst	Kiefer	Forst	2014	2020	4536910	5730060	4	Duebener_Heide_Mitte	3	107	30	193.5	45	540	53.5	22	15	2250	Regen	1	Ki25	-4.21478	115	78	90	64.3262	1.63158	11	10	3	3	2	28	9	10	1	1	0	6.73944	0	0	0	0	0	0	0	0
Ki26_	11200	Forst	Kiefer	Forst	2015	2020	4536910	5730060	4	Duebener_Heide_Mitte	3	104	21	186	51.3333	616	82.5	36.5	15	2250	Regen	4	Ki26	-3.68862	131	78	88	61.3659	1.55	7	16	2	0	1	26	10	15	0	0	1	6.99666	0	0	0	0	0	0	0	0
Ki27_	11200	Forst	Kiefer	Forst	2016	2020	4536910	5730060	4	Duebener_Heide_Mitte	3	101	20	205	46.3333	556	101.5	55.5	15	2250	Nieselregen	0	Ki27	-3.98849	107	75	81	58.5143	1.42857	7	13	2	2	3	31	9	7	0	0	1	6.59706	0	0	0	0	0	0	0	0
Ki28_X	11200	Forst	Kiefer	Forst	2017	2020	4536910	5730060	4	Duebener_Heide_Mitte	3	101	2.5	191	57.75	693	46.5	45.5	15	2250	Regen	1	Ki28X	-2.44532	144	89	102	81.266	1.44444	10	10	4	5	1	32	11	14	0	1	1	7.46391	0	0	0	0	0	0	0	0
Ki29_	11200	Forst	Kiefer	Forst	2018	2020	4536910	5730060	4	Duebener_Heide_Mitte	3	110	10.5	187.5	31.25	375	98.5	30	15	2250	Regen	0	Ki29	-4.23113	152	82	93	68.9347	2.04545	11	12	3	2	2	28	8	13	0	1	2	7.11145	0	0	0	0	0	0	0	0
Pa2_	2100	Urban	Pappel	Urban	1993	2000	2560219	5458069	2	Saartal	9	103	24.5	182.5	69.5833	835	49	49.5	15	5000	Regen	15	Pa2	-1.76807	75	61	75	53.3347	1.33333	18	3	3	2	0	11	9	8	2	4	1	5.71814	1	0	0	0	0	0	0	0
Pa3_	2100	Urban	Pappel	Urban	1994	2000	2560219	5458069	2	Saartal	8	115	33	213.5	63.6667	764	45.5	79	16	4256	Starkregen	6	Pa3	-1.37127	101	76	90	75.1379	1.5	18	5	8	3	1	17	7	8	3	4	2	6.95736	1	0	0	0	0	0	0	0
Pa4_	2100	Urban	Pappel	Urban	1995	2000	2560219	5458069	2	Saartal	9	108	44	211	72.9167	875	71.5	117	15	6000	Tau	1.6	Pa4	-2.67108	55	42	49	39.8827	1.1	18	3	1	2	1	4	1	5	2	4	1	4.23572	1	0	0	0	0	0	0	0
Pa6_	2100	Urban	Pappel	Urban	1997	2000	2560219	5458069	2	Saartal	9	106	20.5	198.5	64.25	771	43	74	15	2500	Regen	4	Pa6	-1.21935	75	59	84	67.061	1.29412	11	8	2	3	0	13	5	9	1	4	3	6.01683	1	0	0	0	0	0	0	0
Pa7_	2100	Urban	Pappel	Urban	1998	2000	2560219	5458069	2	Saartal	8	104	39	184	63.6667	764	44.5	33	15	3000	Regen	1	Pa7	-1.52513	96	77	86	74.4735	1.2	23	6	2	4	1	15	8	11	3	2	2	7.29638	1	0	0	0	0	0	0	0
Pa8_	2100	Urban	Pappel	Urban	1999	2000	2560219	5458069	2	Saartal	9	106	31.5	193	71.75	861	65.5	69	15	3000	Regen	7.2	Pa8	-1.36023	95	70	93	71.6	1.35294	18	6	5	3	0	16	6	9	1	4	2	6.73429	1	0	0	0	0	0	0	0
Pa9_	2100	Urban	Pappel	Urban	2000	2010	2560219	5458069	2	Saartal	8	110	38	173	80.5833	967	113	55.5	15	2700	Starkregen	1	Pa9	-2.9602	54	41	52	38.192	1.09091	11	1	2	3	0	12	4	4	1	3	0	3.72667	1	0	0	0	0	0	0	0
Pa10_	2100	Urban	Pappel	Urban	2001	2010	2560219	5458069	2	Saartal	8	105	35.5	197	78.3333	940	81	80.5	15	2700	Regen	11	Pa10	-2.46773	71	57	76	56.4239	1.46667	15	7	5	2	0	13	5	5	1	4	0	5.14681	1	0	0	0	0	0	0	0
Pa11_	2100	Urban	Pappel	Urban	2002	2010	2560219	5458069	2	Saartal	8	111	41	189	72.9167	875	73.5	92	15	2700	Regen	1	Pa11	-2.3208	106	85	106	77.9935	1.44444	24	7	1	3	1	24	6	8	6	5	0	7.1215	1	0	0	0	0	0	0	0
Pa12_	2100	Urban	Pappel	Urban	2003	2010	2560219	5458069	2	Saartal	9	112	10.5	220	48.1667	578	50.5	55	15	2700	Regen	5	Pa12	-2.96785	31	30	35	18.4929	1	11	1	1	3	0	3	5	3	2	1	0	3.47693	1	0	0	0	0	0	0	0
Pa13_	2100	Urban	Pappel	Urban	2004	2010	2560219	5458069	2	Saartal	9	102	26.5	186.5	58.75	705	101	71.5	15	2700	Regen	1	Pa13	-2.00855	69	57	73	52.737	1.14286	19	5	3	1	0	5	9	7	3	4	1	5.42061	0	2	0	0	0	0	0	0
Pa14_	2100	Urban	Pappel	Urban	2005	2010	2560219	5458069	2	Saartal	9	106	17	182	52.3333	628	60.5	54.5	15	2700	Regen	13	Pa14	-1.47849	86	67	80	63.9835	1.15385	17	6	1	2	1	14	7	10	4	4	1	6.0636	0	2	0	0	0	0	0	0
Pa15_	2100	Urban	Pappel	Urban	2006	2010	2560219	5458069	2	Saartal	9	109	7.5	200	63.6667	764	98	36	15	2700	Nieselregen	1	Pa15	-1.93154	53	44	51	43.3943	1.28571	17	3	6	1	0	4	2	6	2	2	1	4.34567	0	2	0	0	0	0	0	0
Pa16_	2100	Urban	Pappel	Urban	2007	2010	2560219	5458069	2	Saartal	8	111	59	177	67.4167	809	87.5	88	15	2250	Regen	1	Pa16	-3.09128	55	46	55	43.9232	1.42857	13	4	4	2	0	6	4	4	3	6	0	4.4177	0	2	0	0	0	0	0	0
Pa17_	2100	Urban	Pappel	Urban	2008	2010	2560219	5458069	2	Saartal	9	105	48	185	60	720	90.5	55.5	15	2250	Regen	4	Pa17	-3.05096	106	81	92	74.8683	1.55556	19	9	6	5	0	24	2	7	3	5	1	7.2654	0	1	0	0	0	0	0	0
Pa18_	2100	Urban	Pappel	Urban	2009	2010	2560219	5458069	2	Saartal	9	106	7	194	56.75	681	62	46	15	2250	Regen	0	Pa18	-3.77686	79	65	67	60.9508	1.33333	18	6	5	3	0	14	4	6	3	5	1	6.18701	0	1	0	0	0	0	0	0
Pa19_	2100	Urban	Pappel	Urban	2010	2020	2560219	5458069	2	Saartal	9	95	5.5	193	66.0833	793	81	66	15	2250	Regen	2	Pa19	-3.98924	71	56	61	54.3517	1.2	14	6	3	2	0	11	7	6	3	2	2	5.75386	0	0	0	0	0	0	0	0
Pa20_	2100	Urban	Pappel	Urban	2011	2020	2560219	5458069	2	Saartal	8	113	30.5	177	50.5	606	69.5	43.5	15	2250	Regen	0	Pa20	-3.57749	77	63	68	55.7748	1.46154	11	5	1	4	1	18	6	7	2	7	1	5.86445	0	0	0	0	0	0	0	0
Pa21_	2100	Urban	Pappel	Urban	2012	2020	2560219	5458069	2	Saartal	8	106	13	191.5	60.1667	722	52	53.5	15	2250	Regen	1	Pa21	-4.17628	37	34	38	32.4535	1	7	3	0	1	0	8	3	4	5	2	1	3.75124	1	2	0	0	0	0	0	0
Pa22_	2100	Urban	Pappel	Urban	2013	2020	2560219	5458069	2	Saartal	8	100	9.5	201	70.75	849	43.5	42	15	2250	Regen	1	Pa22	-3.80527	61	47	56	49.2204	1.2	15	4	2	2	0	8	5	5	1	4	1	4.69912	1	2	0	0	0	0	0	0
Pa23_	2100	Urban	Pappel	Urban	2014	2020	2560219	5458069	2	Saartal	8	117	51.5	183	58.6667	704	106	63.5	15	1125	Regen	0.6	Pa23	-4.06742	95	72	80	64.6616	1.08333	8	6	1	2	0	20	3	4	3	7	18	5.86614	1	1	0	0	0	0	0	0
Pa24a_	2100	Urban	Pappel	Urban	2016	2020	2560219	5458069	2	Saartal	8	106	39	196.5	64	768	24.5	102	15	1125	Regen	9	Pa24a	-3.27308	89	66	83	60.1946	1.5	14	6	0	2	0	22	6	8	1	6	1	5.88801	1	0	0	0	0	0	0	0
Pa25_	2100	Urban	Pappel	Urban	2018	2020	2560219	5458069	2	Saartal	9	118	28	214	59.5833	715	36	84	15	1125	Regen	4	Pa25	-4.0918	43	38	42	35.1872	1.16667	12	5	2	1	0	7	4	2	2	2	1	3.95353	1	0	0	0	0	0	0	0
Pa32_	11110	Urban	Pappel	Urban	1994	2000	3707396	5712054	3	Gesamtgebiet_Halle	8	103	15.5	204.5	54.1667	650	68.5	29.5	3	4500	Regen	1.66667	Pa32	-3.10421	41	33	41	30.8313	1.22222	19	2	1	1	0	2	3	4	0	1	0	3.14738	0	0	0	0	0	0	0	0
Pa33_	11110	Urban	Pappel	Urban	1995	2000	3707396	5712054	3	Gesamtgebiet_Halle	9	96	28.5	202.5	43	516	48.5	34	9	4500	Nieselregen	1	Pa33	-2.89501	50	38	46	36.0534	1.22222	16	2	4	0	0	6	4	3	0	2	1	3.79046	0	0	0	0	0	0	0	0
Pa34_	11110	Urban	Pappel	Urban	1996	2000	3707396	5712054	3	Gesamtgebiet_Halle	8	73	-32.5	170.5	41.0833	493	60	12	15	4500	Nieselregen	4	Pa34	-3.44567	23	20	29	22.3825	1	13	0	1	0	0	2	3	0	0	1	0	1.84021	0	0	0	0	0	0	0	0
Pa35_	11110	Urban	Pappel	Urban	1997	2000	3707396	5712054	3	Gesamtgebiet_Halle	9	95	12.5	195	43.0833	517	94.5	24.5	15	3750	Regen	2	Pa35	-3.49788	52	47	58	42.2123	1.2	14	5	4	1	0	11	4	4	2	1	1	4.95959	0	0	0	0	0	0	1	0
Pa36_	11110	Urban	Pappel	Urban	2000	2010	3707396	5712054	3	Gesamtgebiet_Halle	8	107	33.5	177.5	46.3333	556	55	61.5	15	2700	Regen	0.666667	Pa36	-3.92291	52	44	56	42.1006	1.25	11	5	2	0	0	8	7	7	1	1	2	4.62276	0	0	0	0	0	0	0	0
Pa37_	11110	Urban	Pappel	Urban	2001	2010	3707396	5712054	3	Gesamtgebiet_Halle	8	96	17.5	195.5	49	588	79.5	24.5	15	2700	Regen	1.66667	Pa37	-3.03863	43	36	44	37.8235	1.125	14	3	3	0	0	6	5	2	1	2	0	3.90882	0	0	0	0	0	0	0	0
Pa38_	11110	Urban	Pappel	Urban	2002	2010	3707396	5712054	3	Gesamtgebiet_Halle	8	100	37.5	196.5	55.25	663	87.5	26.5	15	2700	Starkregen	1.33333	Pa38	-4.28317	93	74	81	60.9005	1.54545	25	8	4	4	0	15	3	8	3	2	2	6.93816	0	0	0	0	0	0	0	0
Pa39_	11110	Urban	Pappel	Urban	2003	2010	3707396	5712054	3	Gesamtgebiet_Halle	8	100	-9	209	35.25	423	34.5	27.5	15	2700	Regen	32	Pa39	-3.18803	37	29	31	22.8644	1	13	1	2	2	0	2	3	4	0	1	1	3.2444	0	0	0	0	0	0	0	0
Pa40_	11110	Urban	Pappel	Urban	2004	2010	3707396	5712054	3	Gesamtgebiet_Halle	8	96	18.5	185	46	552	78.5	43	15	3000	Regen	0	Pa40	-4.74533	72	58	65	47.4607	1.58333	17	9	2	2	1	11	4	9	1	1	1	6.20768	0	0	0	0	0	0	0	0
Pa41_	11110	Urban	Pappel	Urban	2005	2010	3707396	5712054	3	Gesamtgebiet_Halle	8	97	13.5	179.5	46.6667	560	69	43	15	3000	Regen	3.66667	Pa41	-3.01851	44	38	38	35.3995	1.42857	17	4	0	0	0	4	4	4	2	1	2	4.01934	0	0	0	0	0	0	0	0
Pa42_	11110	Urban	Pappel	Urban	2006	2010	3707396	5712054	3	Gesamtgebiet_Halle	8	102	-14.5	200.5	38	456	72	28	15	3000	Regen	0.333333	Pa42	-4.87811	20	17	24	20.2609	1	7	1	3	0	0	1	1	1	0	1	2	2.18699	0	0	0	0	0	0	1	0
Pa43_	11110	Urban	Pappel	Urban	2007	2010	3707396	5712054	3	Gesamtgebiet_Halle	8	107	52	182	59.5833	715	74.5	45.5	15	3000	Regen	2	Pa43	-3.71678	46	43	60	47.93	1	15	3	3	2	0	7	7	1	1	1	3	4.42018	0	0	0	0	0	0	0	0
Pa46_	11110	Urban	Pappel	Urban	2010	2020	3707396	5712054	3	Gesamtgebiet_Halle	8	82	-25.5	195	64.5	774	92	33	15	2250	Regen	0.666667	Pa46	-2.78912	58	49	54	44.8283	1.42857	20	7	0	1	0	6	7	5	1	1	1	4.97422	0	0	0	0	0	0	0	0
Pa47_	11110	Urban	Pappel	Urban	2011	2020	3707396	5712054	3	Gesamtgebiet_Halle	8	102	11	179	41.1667	494	101	30	15	2250	Regen	4	Pa47	-3.76411	20	17	19	16.7114	1	7	1	2	1	0	3	1	1	0	1	0	2.11561	0	0	0	0	0	0	1	0
Pa48_	11110	Urban	Pappel	Urban	2012	2020	3707396	5712054	3	Gesamtgebiet_Halle	8	98	-1.5	188.5	41.8333	502	54.5	40	15	2250	NA	NA	Pa48	-4.51817	26	23	31	22.2661	1.33333	11	2	2	0	0	3	2	1	0	2	0	2.33831	0	0	0	0	0	0	0	0
Pa49_	11110	Urban	Pappel	Urban	2013	2020	3707396	5712054	3	Gesamtgebiet_Halle	8	93	1	195.5	56	672	49	45.5	15	2250	Regen	1	Pa49	-3.10418	39	33	40	31.6222	1	10	4	3	0	0	7	2	4	0	1	2	3.76375	0	0	0	0	0	0	0	0
Pa50a_	11110	Urban	Pappel	Urban	2014	2020	3707396	5712054	3	Gesamtgebiet_Halle	8	110	36	188.5	42.3333	508	82	19.5	15	1125	Regen	0.666667	Pa50a	-3.96447	44	32	41	30.6952	1.28571	9	4	3	0	0	2	3	5	2	4	0	3.43915	0	0	0	0	0	0	0	0
Pa53_	11111	Urban	Pappel	Urban	1994	2000	3699849	5711547	3	Gesamtgebiet_Leipzig	8	103	16	205	53	636	63	30.5	8	4500	Regen	1	Pa53	-4.595	50	40	56	37.6365	1.42857	17	6	0	0	0	4	5	4	2	1	1	4.02079	0	0	0	0	0	0	0	0
Pa54_	11111	Urban	Pappel	Urban	1995	2000	3699849	5711547	3	Gesamtgebiet_Leipzig	9	96	29	203	43.5	522	50	35.5	9	4500	Regen	1	Pa54	-1.72044	67	57	77	60.7585	1.4	21	5	4	0	0	8	8	6	2	2	1	5.13594	1	1	0	1	1	0	0	0
Pa55_	11111	Urban	Pappel	Urban	1996	2000	3699849	5711547	3	Gesamtgebiet_Leipzig	8	74	-31	171.5	42.4167	509	65.5	13.5	15	4500	Nieselregen	3.66667	Pa55	-3.53619	79	65	84	60.801	1.25	15	9	4	3	1	12	7	9	3	1	1	6.79264	1	1	0	1	1	0	0	0
Pa56_	11111	Urban	Pappel	Urban	1997	2000	3699849	5711547	3	Gesamtgebiet_Leipzig	9	95	13.5	196	42.8333	514	92.5	25.5	15	3750	Regen	3	Pa56	-2.8522	88	72	79	59.0746	1.4	18	6	6	3	0	16	7	10	4	1	1	6.67304	1	1	0	1	1	0	0	0
Pa57_	11111	Urban	Pappel	Urban	1998	2000	3699849	5711547	3	Gesamtgebiet_Leipzig	8	99	43	177.5	49.25	591	54.5	21.5	15	3300	Regen	0	Pa57	-3.67935	73	56	77	51.4437	1.27273	21	6	2	0	0	8	6	10	2	1	0	5.59643	1	1	0	1	0	0	0	0
Pa58_	11111	Urban	Pappel	Urban	1999	2000	3699849	5711547	3	Gesamtgebiet_Leipzig	8	104	24	192	41.75	501	58.5	34.5	15	3000	Regen	2	Pa58	-2.65434	82	67	77	59.3369	1.36364	25	8	2	0	1	9	9	8	1	3	1	6.20135	1	1	0	1	0	0	0	0
Pa59_	11111	Urban	Pappel	Urban	2000	2010	3699849	5711547	3	Gesamtgebiet_Leipzig	8	108	33.5	178.5	43.6667	524	53.5	57.5	15	2700	Regen	1.66667	Pa59	-3.97101	90	70	97	64.233	1.25	23	6	4	1	0	9	9	14	2	1	1	6.00092	1	1	0	1	0	0	0	0
Pa60_	11111	Urban	Pappel	Urban	2001	2010	3699849	5711547	3	Gesamtgebiet_Leipzig	8	97	18.5	196.5	47.8333	574	73	23.5	15	2700	Regen	2	Pa60	-2.95516	87	64	75	59.7404	1.38462	20	9	2	1	0	8	6	12	2	2	2	6.22936	1	0	0	1	0	0	0	0
Pa61_	11111	Urban	Pappel	Urban	2002	2010	3699849	5711547	3	Gesamtgebiet_Leipzig	8	101	38	197	53.75	645	84	28	15	2700	Starkregen	3	Pa61	-2.50881	113	84	98	75.2746	1.4375	29	12	6	1	0	10	9	7	5	4	1	7.51128	1	1	0	1	0	0	0	0
Pa62_	11111	Urban	Pappel	Urban	2003	2010	3699849	5711547	3	Gesamtgebiet_Leipzig	8	100	-8	209.5	33	396	30.5	25	15	2700	Regen	21	Pa62	-2.34679	62	51	55	44.8122	1.33333	18	4	5	1	0	6	5	8	1	1	2	5.59516	1	0	0	1	0	0	0	0
Pa63_	11111	Urban	Pappel	Urban	2004	2010	3699849	5711547	3	Gesamtgebiet_Leipzig	8	97	18.5	186	44.9167	539	74	41.5	15	3000	Regen	1.66667	Pa63	-2.71294	93	72	77	61.4491	1.6	19	12	3	1	2	9	7	15	1	2	1	6.96774	1	0	0	1	0	0	0	0
Pa64_	11111	Urban	Pappel	Urban	2005	2010	3699849	5711547	3	Gesamtgebiet_Leipzig	8	97	13.5	181	45.0833	541	69	39.5	15	3000	Regen	3	Pa64	-3.49067	57	45	69	45.6254	1.18182	16	7	2	0	0	7	2	7	1	1	2	5.05984	1	0	0	1	0	0	0	0
Pa65_	11111	Urban	Pappel	Urban	2006	2010	3699849	5711547	3	Gesamtgebiet_Leipzig	8	102	-14	201.5	35.6667	428	62	25	15	3000	Regen	0.933333	Pa65	-2.21223	76	65	79	56.8284	1.2	22	8	4	1	0	14	4	6	4	1	1	5.88314	1	0	0	1	0	0	0	0
Pa66_	11111	Urban	Pappel	Urban	2007	2010	3699849	5711547	3	Gesamtgebiet_Leipzig	8	107	52.5	183	59.3333	712	77	41.5	15	3000	Regen	2.66667	Pa66	-2.87346	75	61	82	63.3065	1.25	20	6	3	2	0	17	5	4	2	1	1	6.0755	1	0	0	1	0	0	0	0
Pa67_	11111	Urban	Pappel	Urban	2008	2010	3699849	5711547	3	Gesamtgebiet_Leipzig	8	103	46.5	190	43.0833	517	57.5	24.5	15	3000	Regen	1	Pa67	-2.60171	94	77	98	74.4865	1.28571	20	9	4	3	0	10	4	15	5	6	1	7.30452	1	0	0	1	0	0	0	0
Pa68_	11111	Urban	Pappel	Urban	2009	2010	3699849	5711547	3	Gesamtgebiet_Leipzig	8	98	-5	195.5	53.0833	637	51	29	15	2250	Starkregen	1	Pa68	-3.18886	74	62	82	53.1827	1.42857	21	7	2	0	0	17	3	7	3	1	1	5.80162	1	0	0	1	0	0	0	0
Pa69_	11111	Urban	Pappel	Urban	2010	2020	3699849	5711547	3	Gesamtgebiet_Leipzig	8	83	-25	196	63	756	89	32	15	2250	Nieselregen	0.333333	Pa69	-2.32712	99	80	92	72.179	1.21429	28	9	4	0	0	17	5	10	4	2	1	7.2101	1	0	0	1	0	0	0	0
Pa70_	11111	Urban	Pappel	Urban	2011	2020	3699849	5711547	3	Gesamtgebiet_Leipzig	8	103	11.5	180	40.5833	487	94.5	28	15	2250	Regen	3.33333	Pa70	-1.76142	94	69	89	64.9928	1.54545	19	6	2	1	0	17	6	12	2	3	1	6.31468	1	0	0	1	0	0	0	0
Pa71_	11111	Urban	Pappel	Urban	2012	2020	3699849	5711547	3	Gesamtgebiet_Leipzig	8	98	-1	189.5	40.75	489	54.5	36.5	15	2250	NA	NA	Pa71	-2.98972	72	59	79	51.2672	1	13	7	6	3	1	10	6	6	3	3	1	6.33576	1	0	0	1	0	0	0	0
Pa72_	11111	Urban	Pappel	Urban	2013	2020	3699849	5711547	3	Gesamtgebiet_Leipzig	8	94	1.5	196.5	53.5	642	45	42	15	2250	Regen	1.66667	Pa72	-3.5133	96	79	93	69.3723	1	17	11	3	0	1	27	6	8	3	2	1	6.91696	1	0	0	1	0	0	0	0
Pa73_	11111	Urban	Pappel	Urban	2014	2020	3699849	5711547	3	Gesamtgebiet_Leipzig	8	110	36	189.5	42.1667	506	82	18.5	15	1125	Regen	1.33333	Pa73	-3.95053	42	37	46	34.2481	1	7	4	4	1	0	5	4	5	2	4	1	4.48263	1	0	0	0	0	0	0	0
Pa74_	11111	Urban	Pappel	Urban	2015	2020	3699849	5711547	3	Gesamtgebiet_Leipzig	8	107	24	208	40.25	483	86.5	25	15	1125	Regen	0	Pa74	-4.55771	22	20	23	16.63	1	8	2	3	1	0	2	1	2	0	1	0	2.41835	1	0	0	1	0	0	0	0
Pa75_	11111	Urban	Pappel	Urban	2016	2020	3699849	5711547	3	Gesamtgebiet_Leipzig	8	104	24	195.5	35.5833	427	34	34.5	15	1125	Regen	3.66667	Pa75	-4.04022	57	46	50	42.4458	1.18182	14	5	1	1	0	9	4	5	4	2	1	4.81527	1	0	0	1	0	0	0	0
Pa76_	11111	Urban	Pappel	Urban	2017	2020	3699849	5711547	3	Gesamtgebiet_Leipzig	8	104	7.5	191.5	43.8333	526	80	22.5	15	1125	Regen	0.333333	Pa76	-3.81038	67	52	62	46.3449	1.18182	13	6	3	1	0	11	6	5	2	4	1	5.34264	1	0	0	1	0	0	0	0
Pa77a_	11111	Urban	Pappel	Urban	2018	2020	3699849	5711547	3	Gesamtgebiet_Leipzig	8	112	12.5	214.5	25.1667	302	20.5	21	15	1125	Regen	2.33333	Pa77a	-5.11051	37	34	38	31.7211	1.2	9	4	1	2	0	4	5	4	2	1	2	4.17434	1	0	0	1	0	0	0	0
[truncated: 2,067 more columns]

## Sheet: qPCR
sample_name	ct_plant	ct_sd_plant	ct_insects	ct_sd_insects
Bu1	15.3765	0.106268	17.5233	0.0551522
Bu1	15.5546	0.106268	17.4452	0.0551522
Bu1	15.5659	0.106268	17.5517	0.0551522
Bu10	12.2543	0.0280854	21.531	0.0381771
Bu10	12.2968	0.0280854	21.4751	0.0381771
Bu10	12.3074	0.0280854	21.458	0.0381771
Bu100	12.4255	0.0494383	21.1749	0.129506
Bu100	12.4483	0.0494383	21.3542	0.129506
Bu100	12.5202	0.0494383	21.4264	0.129506
Bu101	13.7657	0.117121	22.7608	0.20995
Bu101	13.9367	0.117121	23.177	0.20995
Bu101	13.9899	0.117121	22.9206	0.20995
Bu102	14.9845	0.0510344	19.9138	0.0190722
Bu102	14.9982	0.0510344	19.9519	0.0190722
Bu102	15.0789	0.0510344	19.9331	0.0190722
Bu103	15.6532	0.0275511	19.7224	0.0897756
Bu103	15.6993	0.0275511	19.8443	0.0897756
Bu103	15.7023	0.0275511	19.8975	0.0897756
Bu104	13.144	0.0543235	21.0492	0.102841
Bu104	13.2036	0.0543235	20.9825	0.102841
Bu104	13.2524	0.0543235	20.8473	0.102841
Bu105	13.33	0.0315141	21.2304	0.161408
Bu105	13.3465	0.0315141	21.2257	0.161408
Bu105	13.3909	0.0315141	21.5076	0.161408
Bu106	12.2566	0.0446263	20.2963	0.058211
Bu106	12.2633	0.0446263	20.1993	0.058211
Bu106	12.337	0.0446263	20.3035	0.058211
Bu108	12.8587	0.0807398	22.988	0.0564168
Bu108	12.9799	0.0807398	22.9011	0.0564168
Bu108	13.0118	0.0807398	23.007	0.0564168
Bu11	13.5808	0.0555725	19.9459	0.157157
Bu11	13.6363	0.0555725	19.6345	0.157157
Bu11	13.6919	0.0555725	19.8271	0.157157
Bu110	13.1714	0.249528	22.6696	0.133389
Bu110	13.5144	0.249528	22.4092	0.133389
Bu110	13.6568	0.249528	22.4888	0.133389
Bu111	13.871	0.00283864	23.0664	0.105345
Bu111	13.8736	0.00283864	23.1819	0.105345
Bu111	13.8766	0.00283864	23.2767	0.105345
Bu112	11.9323	0.130893	22.8289	0.0501226
Bu112	12.0298	0.130893	22.9049	0.0501226
Bu112	12.1914	0.130893	22.8103	0.0501226
Bu113	14.1252	0.549492	22.7928	0.219756
Bu113	14.2207	0.549492	22.9495	0.219756
Bu113	15.1211	0.549492	23.2268	0.219756
Bu114	13.1397	0.0907256	23.2953	0.0857629
Bu114	13.2626	0.0907256	23.4668	0.0857629
Bu114	13.3168	0.0907256	23.3803	0.0857629
Bu115	13.1761	0.180284	23.8723	0.0414189
Bu115	13.2073	0.180284	23.9489	0.0414189
Bu115	13.5028	0.180284	23.9379	0.0414189
Bu116	11.9985	0.147084	23.3449	0.055913
Bu116	12.1845	0.147084	23.4564	0.055913
Bu116	12.2889	0.147084	23.3937	0.055913
Bu117	12.7404	0.146568	20.0418	0.111802
Bu117	12.7496	0.146568	20.2516	0.111802
Bu117	12.9987	0.146568	20.0796	0.111802
Bu118	11.7628	0.170022	18.2555	0.0538415
Bu118	11.9941	0.170022	18.3297	0.0538415
Bu118	12.0943	0.170022	18.225	0.0538415
Bu119	12.3337	0.0439026	19.6876	0.0315464
Bu119	12.3612	0.0439026	19.6245	0.0315464
Bu119	12.4197	0.0439026	19.6557	0.0315464
Bu12	13.4575	0.0662733	20.9553	0.0362301
Bu12	13.5119	0.0662733	20.8855	0.0362301
Bu12	13.5894	0.0662733	20.9374	0.0362301
Bu120	11.5781	0.014819	20.5579	0.0900432
Bu120	11.5955	0.014819	20.5476	0.0900432
Bu120	11.6076	0.014819	20.7084	0.0900432
Bu121	10.3683	0.0347261	20.9422	0.0471513
Bu121	10.4064	0.0347261	20.8905	0.0471513
Bu121	10.4376	0.0347261	20.8481	0.0471513
Bu122	9.20311	0.267261	22.2534	0.110583
Bu122	9.63426	0.267261	22.1994	0.110583
Bu122	9.6923	0.267261	22.4122	0.110583
Bu123	11.3224	0.187212	22.386	0.099019
Bu123	11.4999	0.187212	22.4093	0.099019
Bu123	11.6967	0.187212	22.5679	0.099019
Bu124	13.5765	0.120512	23.9193	0.0169635
Bu124	13.6812	0.120512	23.9014	0.0169635
Bu124	13.8169	0.120512	23.8854	0.0169635
Bu125	13.0899	0.0865418	21.558	0.0618636
Bu125	13.1361	0.0865418	21.6649	0.0618636
Bu125	13.2575	0.0865418	21.5575	0.0618636
Bu126	13.2188	0.0248773	19.148	0.141454
Bu126	13.2527	0.0248773	19.1829	0.141454
Bu126	13.2672	0.0248773	19.4086	0.141454
Bu13	13.4937	0.0460051	20.2349	0.150104
Bu13	13.5723	0.0460051	20.1959	0.150104
Bu13	13.5743	0.0460051	20.4732	0.150104
Bu14	13.102	0.0488502	19.0939	0.0202398
Bu14	13.1789	0.0488502	19.0965	0.0202398
Bu14	13.1926	0.0488502	19.0602	0.0202398
Bu15	14.0997	0.0309852	21.4734	0.0479118
Bu15	14.1029	0.0309852	21.414	0.0479118
Bu15	14.1549	0.0309852	21.5088	0.0479118
Bu16	12.9486	0.0105302	20.4408	0.0248078
Bu16	12.9645	0.0105302	20.3933	0.0248078
Bu16	12.9686	0.0105302	20.4046	0.0248078
Bu18	12.5989	0.0329859	17.501	0.0684644
Bu18	12.6256	0.0329859	17.6162	0.0684644
Bu18	12.6645	0.0329859	17.4945	0.0684644
Bu2	14.9134	0.0957747	20.4189	0.0298244
Bu2	15.077	0.0957747	20.4352	0.0298244
Bu2	15.0815	0.0957747	20.4767	0.0298244
Bu20	16.8821	0.103938	23.3608	0.173893
Bu20	16.9138	0.103938	23.452	0.173893
Bu20	17.0758	0.103938	23.6971	0.173893
Bu21	11.6119	0.305747	22.7919	0.120664
Bu21	12.1236	0.305747	22.7638	0.120664
Bu21	12.1577	0.305747	22.9854	0.120664
Bu22	12.1555	0.0957038	21.8338	0.0223165
Bu22	12.1597	0.0957038	21.8762	0.0223165
Bu22	12.3233	0.0957038	21.8671	0.0223165
Bu23	12.7553	0.0382367	23.203	0.0595967
Bu23	12.7747	0.0382367	23.2907	0.0595967
Bu23	12.8291	0.0382367	23.3167	0.0595967
Bu24	11.8862	0.0323916	21.9485	0.0171067
Bu24	11.8943	0.0323916	21.9652	0.0171067
Bu24	11.9459	0.0323916	21.9827	0.0171067
Bu25	11.8784	0.052314	20.0997	0.0113066
Bu25	11.9438	0.052314	20.092	0.0113066
Bu25	11.9819	0.052314	20.0775	0.0113066
Bu27	11.8196	0.04263	22.9648	0.0881591
Bu27	11.8834	0.04263	23.1266	0.0881591
Bu27	11.9004	0.04263	22.9851	0.0881591
Bu28	11.3318	0.332041	20.5315	0.100425
Bu28	11.882	0.332041	20.6764	0.100425
Bu28	11.929	0.332041	20.7244	0.100425
Bu29	11.7177	0.0164228	21.8819	0.0783961
Bu29	11.7379	0.0164228	21.7866	0.0783961
Bu29	11.7503	0.0164228	21.9421	0.0783961
Bu3	13.4209	0.0959284	19.8997	0.111822
Bu3	13.5838	0.0959284	19.919	0.111822
Bu3	13.5901	0.0959284	19.7164	0.111822
Bu30	11.0893	0.0858228	21.664	0.086075
Bu30	11.218	0.0858228	21.6195	0.086075
Bu30	11.252	0.0858228	21.7857	0.086075
Bu32	15.8659	0.201392	23.2724	0.164887
Bu32	15.9741	0.201392	23.1472	0.164887
Bu32	16.256	0.201392	23.474	0.164887
Bu33	16.0632	0.175556	20.455	0.0994949
Bu33	16.1813	0.175556	20.5438	0.0994949
Bu33	16.4086	0.175556	20.6537	0.0994949
Bu34	14.9148	0.0500872	22.2332	0.211973
Bu34	14.927	0.0500872	22.6478	0.211973
Bu34	15.007	0.0500872	22.3639	0.211973
Bu35	13.5057	0.285638	20.618	0.0979883
Bu35	13.86	0.285638	20.6988	0.0979883
Bu35	14.071	0.285638	20.813	0.0979883
Bu36	10.9912	0.403396	20.7068	0.109289
Bu36	11.6204	0.403396	20.7785	0.109289
Bu36	11.7432	0.403396	20.9215	0.109289
Bu37	14.6281	0.0239116	22.3293	0.211444
Bu37	14.6439	0.0239116	21.9509	0.211444
Bu37	14.6751	0.0239116	21.9766	0.211444
Bu38	11.2607	0.05002	18.2745	0.0526966
Bu38	11.3444	0.05002	18.238	0.0526966
Bu38	11.35	0.05002	18.3419	0.0526966
Bu39	14.3802	0.154109	22.4504	0.151412
Bu39	14.5718	0.154109	22.5728	0.151412
Bu39	14.6851	0.154109	22.7515	0.151412
Bu4	8.3132	0.0158709	19.7184	0.0266341
Bu4	8.32125	0.0158709	19.7019	0.0266341
Bu4	8.34381	0.0158709	19.754	0.0266341
Bu40	13.5462	0.109222	23.9599	0.272776
Bu40	13.6787	0.109222	24.0828	0.272776
Bu40	13.7629	0.109222	24.4816	0.272776
Bu41	13.8932	0.0767355	21.3926	0.20285
Bu41	13.9287	0.0767355	21.0385	0.20285
Bu41	14.0403	0.0767355	21.3869	0.20285
Bu42	13.5773	0.0382953	20.1064	0.0503771
Bu42	13.61	0.0382953	20.0666	0.0503771
Bu42	13.6536	0.0382953	20.1667	0.0503771
Bu43	14.0525	0.0766697	21.8282	0.0103213
Bu43	14.0894	0.0766697	21.8082	0.0103213
Bu43	14.1999	0.0766697	21.8137	0.0103213
Bu44	13.4178	0.0361607	19.6647	0.0951077
Bu44	13.4678	0.0361607	19.8538	0.0951077
Bu44	13.488	0.0361607	19.7769	0.0951077
Bu45	12.2242	0.115555	23.4781	0.0585574
Bu45	12.2593	0.115555	23.3762	0.0585574
Bu45	12.4396	0.115555	23.3772	0.0585574
Bu46	12.8535	0.175735	26.126	0.121133
Bu46	12.9403	0.175735	26.2427	0.121133
Bu46	13.1918	0.175735	26.3682	0.121133
Bu47	13.3819	0.202199	24.1839	0.0234389
Bu47	13.4963	0.202199	24.1639	0.0234389
Bu47	13.775	0.202199	24.1372	0.0234389
Bu48	11.5479	0.0489844	23.5921	0.0209156
Bu48	11.5711	0.0489844	23.5961	0.0209156
Bu48	11.6419	0.0489844	23.6301	0.0209156
Bu49	11.6049	1.34595	25.8505	0.0151688
Bu49	11.6173	1.34595	25.8791	0.0151688
Bu49	13.9423	1.34595	25.8736	0.0151688
Bu5	13.913	0.193922	19.9354	0.148727
Bu5	14.1585	0.193922	19.6845	0.148727
Bu5	14.2958	0.193922	19.6717	0.148727
Bu50	13.4561	0.0790208	24.4822	0.111538
Bu50	13.5198	0.0790208	24.6393	0.111538
Bu50	13.6132	0.0790208	24.6979	0.111538
Bu51	13.8605	0.115209	23.2244	0.0422781
Bu51	14.0119	0.115209	23.2703	0.0422781
Bu51	14.0867	0.115209	23.3088	0.0422781
Bu52	13.8858	0.0533384	21.9566	0.0275364
Bu52	13.8967	0.0533384	21.9265	0.0275364
Bu52	13.9832	0.0533384	21.9815	0.0275364
Bu53	9.97207	0.516071	25.8612	0.0672244
Bu53	10.5549	0.516071	25.9956	0.0672244
Bu53	11.0012	0.516071	25.9274	0.0672244
Bu54	12.9852	0.166113	20.9456	0.112248
Bu54	13.2331	0.166113	21.1478	0.112248
Bu54	13.3007	0.166113	20.9623	0.112248
Bu55	9.75654	0.0758446	22.8115	0.0910801
Bu55	9.8772	0.0758446	22.9188	0.0910801
Bu55	9.89648	0.0758446	22.9927	0.0910801
Bu56	11.5208	0.241177	25.7048	0.0721397
Bu56	11.7628	0.241177	25.6972	0.0721397
Bu56	12.0032	0.241177	25.8257	0.0721397
Bu58	16.2234	0.342241	18.9468	0.148717
Bu58	16.392	0.342241	18.6656	0.148717
Bu58	16.8822	0.342241	18.7222	0.148717
Bu59	14.3834	0.0303298	17.3491	0.107665
Bu59	14.4303	0.0303298	17.4143	0.107665
Bu59	14.4402	0.0303298	17.204	0.107665
Bu6	13.3264	0.0286267	20.7687	0.0807969
Bu6	13.3269	0.0286267	20.9223	0.0807969
Bu6	13.3762	0.0286267	20.802	0.0807969
Bu60	13.8486	0.405548	19.1336	0.05322
Bu60	14.5036	0.405548	19.2183	0.05322
Bu60	14.5904	0.405548	19.2317	0.05322
Bu61	11.4884	0.0937596	22.894	0.227574
Bu61	11.5806	0.0937596	22.4404	0.227574
Bu61	11.6759	0.0937596	22.6343	0.227574
Bu62	12.3718	0.29295	19.8393	0.115944
Bu62	12.4865	0.29295	19.7589	0.115944
Bu62	12.9267	0.29295	19.9875	0.115944
Bu63	13.5956	0.136778	20.7067	0.101595
Bu63	13.8183	0.136778	20.5596	0.101595
Bu63	13.8445	0.136778	20.7545	0.101595
Bu64	12.8378	0.0424383	16.9286	0.115043
Bu64	12.8759	0.0424383	16.9624	0.115043
Bu64	12.9225	0.0424383	17.1426	0.115043
Bu65	15.9401	0.0163222	21.6028	0.0966339
Bu65	15.948	0.0163222	21.6247	0.0966339
Bu65	15.9714	0.0163222	21.7801	0.0966339
Bu66	13.8618	0.0692474	19.9827	0.357948
Bu66	13.9554	0.0692474	19.5537	0.357948
Bu66	13.9971	0.0692474	20.2646	0.357948
Bu67	11.2005	0.0110658	23.1484	0.168581
Bu67	11.2068	0.0110658	23.4075	0.168581
Bu67	11.2221	0.0110658	23.4648	0.168581
Bu68	12.4533	0.0485445	15.1579	0.146599
Bu68	12.494	0.0485445	14.8734	0.146599
Bu68	12.55	0.0485445	15.0772	0.146599
Bu69	15.9286	0.0762349	18.3245	0.104876
Bu69	15.9445	0.0762349	18.1346	0.104876
Bu69	16.0679	0.0762349	18.3067	0.104876
Bu7	11.8699	0.0705696	19.9243	0.118594
Bu7	11.8721	0.0705696	19.9629	0.118594
Bu7	11.9932	0.0705696	20.1463	0.118594
Bu71	13.342	0.0723406	19.2319	0.979576
Bu71	13.4606	0.0723406	19.2063	0.979576
Bu71	13.4731	0.0723406	19.2105	0.979576
Bu72	9.26564	0.566881	21.7999	0.0913453
Bu72	10.2407	0.566881	21.75	0.0913453
Bu72	10.2541	0.566881	21.6227	0.0913453
Bu73	11.9967	0.0395233	20.0875	0.124022
Bu73	12.0355	0.0395233	20.3231	0.124022
Bu73	12.0758	0.0395233	20.1379	0.124022
Bu74	11.5876	0.0677489	19.7105	0.313091
Bu74	11.7024	0.0677489	19.2637	0.313091
Bu74	11.7074	0.0677489	19.867	0.313091
Bu75	10.8648	0.053117	19.1629	0.227942
Bu75	10.8728	0.053117	19.5513	0.227942
Bu75	10.9605	0.053117	19.5638	0.227942
Bu76	14.3942	0.0291047	21.2199	0.161151
Bu76	14.3948	0.0291047	21.5418	0.161151
Bu76	14.4449	0.0291047	21.3947	0.161151
Bu77	15.603	0.220524	21.4264	0.1494
Bu77	15.9778	0.220524	21.3169	0.1494
Bu77	15.9917	0.220524	21.6125	0.1494
Bu78	12.3786	0.0554803	20.1531	0.0519694
Bu78	12.4544	0.0554803	20.0744	0.0519694
Bu78	12.4866	0.0554803	20.0549	0.0519694
Bu79	13.2803	0.0999397	21.042	0.0253825
Bu79	13.3136	0.0999397	21.0912	0.0253825
Bu79	13.4676	0.0999397	21.0775	0.0253825
Bu8	12.054	0.133809	19.8317	0.0335507
Bu8	12.2516	0.133809	19.785	0.0335507
Bu8	12.3092	0.133809	19.85	0.0335507
Bu80	11.9118	0.0595115	19.3224	0.524476
Bu80	11.9809	0.0595115	20.2794	0.524476
Bu80	12.0302	0.0595115	19.4289	0.524476
Bu81	9.74454	0.0936773	19.2131	0.0855865
Bu81	9.78831	0.0936773	19.3122	0.0855865
Bu81	9.92419	0.0936773	19.3835	0.0855865
Bu82	11.708	0.17909	21.3791	0.0558447
Bu82	11.9618	0.17909	21.3452	0.0558447
Bu82	12.0539	0.17909	21.4543	0.0558447
Bu83	10.8598	0.142404	22.642	0.0987081
Bu83	10.9898	0.142404	22.4505	0.0987081
Bu83	11.1442	0.142404	22.5875	0.0987081
Bu84	13.0392	0.0409385	23.7797	0.182385
Bu84	13.0571	0.0409385	23.4675	0.182385
Bu84	13.1174	0.0409385	23.4603	0.182385
Bu85	16.2604	0.0558372	22.4346	0.0219067
Bu85	16.3262	0.0558372	22.3985	0.0219067
Bu85	16.3715	0.0558372	22.3951	0.0219067
Bu86	14.1776	0.107242	22.9422	0.0372683
Bu86	14.1961	0.107242	22.8764	0.0372683
Bu86	14.3719	0.107242	22.8791	0.0372683
Bu87a	13.8	0.00782645	24.6287	0.0898672
Bu87a	13.8133	0.00782645	24.449	0.0898672
Bu87a	13.8139	0.00782645	24.5383	0.0898672
Bu88	11.6655	0.0491229	19.0195	0.215265
Bu88	11.7326	0.0491229	18.6232	0.215265
Bu88	11.7612	0.0491229	18.967	0.215265
Bu89	13.7422	0.22975	22.8416	0.0956874
Bu89	13.7982	0.22975	22.6507	0.0956874
Bu89	14.1652	0.22975	22.7346	0.0956874
Bu9	15.3618	0.057119	17.8001	0.0328762
Bu9	15.4018	0.057119	17.7971	0.0328762
Bu9	15.4745	0.057119	17.8555	0.0328762
Bu90	13.2393	0.339845	19.5377	0.208809
Bu90	13.4392	0.339845	19.7645	0.208809
Bu90	13.9019	0.339845	19.3474	0.208809
Bu91	14.055	0.513084	20.3456	0.0318798
Bu91	14.8916	0.513084	20.3869	0.0318798
Bu91	14.9878	0.513084	20.4084	0.0318798
Bu92	14.6754	0.381898	21.075	0.148519
Bu92	15.1355	0.381898	20.883	0.148519
Bu92	15.4335	0.381898	20.7827	0.148519
Bu93	15.089	0.132693	16.9791	0.475969
Bu93	15.2712	0.132693	17.7141	0.475969
Bu93	15.3472	0.132693	16.8226	0.475969
Bu94	12.7822	0.254486	19.4195	0.148733
Bu94	12.8725	0.254486	19.3558	0.148733
Bu94	13.2612	0.254486	19.6393	0.148733
Bu95	13.4106	0.304573	24.785	0.169288
Bu95	13.8777	0.304573	24.5512	0.169288
Bu95	13.9828	0.304573	24.8801	0.169288
Bu96	14.1721	0.334539	25.7533	0.221724
Bu96	14.7271	0.334539	25.3391	0.221724
Bu96	14.7732	0.334539	25.409	0.221724
Bu97	13.9675	0.174667	20.9006	0.367051
Bu97	14.19	0.174667	20.8126	0.367051
Bu97	14.312	0.174667	21.4878	0.367051
Bu98	13.2992	0.0263762	20.6349	0.0287688
Bu98	13.3195	0.0263762	20.6675	0.0287688
Bu98	13.3515	0.0263762	20.6102	0.0287688
Bu99	12.5081	0.340448	17.9606	0.0691712
Bu99	12.9303	0.340448	17.9472	0.0691712
Bu99	13.1818	0.340448	18.0731	0.0691712
BuX	10.9629	0.0761551	21.2963	0.0228294
BuX	11.0663	0.0761551	21.2712	0.0228294
BuX	11.1115	0.0761551	21.3168	0.0228294

## Sheet: qPCRMockCommunity
MockCommunity	Cт Mean	Cт SD	Sample Name		dil
1	9.57626	0.0462937	1 1:10	0.1	10
1	13.2862	0.0562635	1 1:100	0.01	100
1	17.1969	0.0679949	1 1:1000	0.001	1000
1	20.7384	0.0673341	1 1:10000	0.0001	10000
2	8.57655	0.0419766	2 1:10	0.1	10
2	12.2324	0.0176684	2 1:100	0.01	100
2	16.1287	0.0351049	2 1:1000	0.001	1000
2	19.863	0.036084	2 1:10000	0.0001	10000
3	9.5036	0.0215041	3 1:10	0.1	10
3	13.1527	0.073888	3 1:100	0.01	100
3	16.976	0.0943629	3 1:1000	0.001	1000
3	20.6222	0.0872104	3 1:10000	0.0001	10000
4	9.83559	0.0489221	4 1:10	0.1	10
4	13.44	0.0767904	4 1:100	0.01	100
4	17.3914	0.118882	4 1:1000	0.001	1000
4	21.2289	0.198871	4 1:10000	0.0001	10000
5	10.5057	0.0861918	5 1:10	0.1	10
5	14.2468	0.0539136	5 1:100	0.01	100
5	17.8165	0.13036	5 1:1000	0.001	1000
5	21.4719	0.0856015	5 1:10000	0.0001	10000
6	8.7878	0.0844785	6 1:10	0.1	10
6	12.5	0	6 1:100	0.01	100
6	16.3795	0.0838687	6 1:1000	0.001	1000
6	20.2302	0.0425112	6 1:10000	0.0001	10000
7	9.64516	0.114034	7 1:10	0.1	10
7	13.0675	0.0721278	7 1:100	0.01	100
7	16.8819	0.0562052	7 1:1000	0.001	1000
7	20.1664	0.327857	7 1:10000	0.0001	10000
