# Supplementary material for: Environmental DNA from archived leaves reveals widespread temporal turnover and biotic homogenization in forest arthropod communities
Source: eLife journal article supplement (doi:10.7554/elife.78521), 2022-11-07
Supplement: supp [file elife-78521-supp-v1.zip › elife_poa_e78521_Supplementary_file_3.xlsx]

## Sheet: Sheet1
OTU_ID	Order	Family	Genus	Species	Host_species	Beech_2014	Poplar_2016	Beech_2016	Beech_2018
OTU_34_Lepidoptera	Lepidoptera	Gracillariidae	Phyllonorycter	populifoliella	Poplar main host	0	18643	0	0
OTU_247_Lepidoptera	Lepidoptera	Tortricidae	Gypsonoma	aceriana	Poplar main host	0	8368	0	0
OTU_162_Hemiptera	Hemiptera	Pemphigidae	Pemphigus	spyrothecae	Poplar main host	0	6426	0	0
OTU_62_Lepidoptera	Lepidoptera	Nepticulidae	Stigmella	trimaculella	Poplar main host	0	6302	0	0
OTU_280_Lepidoptera	Lepidoptera	Noctuidae	Subacronicta	megacephala	Poplar main host	0	2407	0	0
OTU_271_Lepidoptera	Lepidoptera	Tortricidae	Gypsonoma	oppressana	Poplar main host	0	1744	0	0
OTU_70_Lepidoptera	Lepidoptera	Gracillariidae	Phyllocnistis	unipunctella	Poplar main host	0	1609	0	0
OTU_208Lepidoptera	Lepidoptera	Geometridae	Stegania	trimaculata	Poplar main host	0	760	0	0
OTU_173_Lepidoptera	Lepidoptera	Nepticulidae	Ectoedemia	hannoverella	Poplar main host	0	603	0	0
OTU_123_Lepidoptera	Lepidoptera	Tortricidae	Ancylis	laetana	Poplar main host	0	283	0	0
OTU_153_Coleoptera	Coleoptera	Coccinellidae	Harmonia	axyridis	NA	0	9317	0	0
OTU_102_Araneae	Araneae	Theridiidae	Phylloneta	impressa	NA	0	5928	0	0
OTU_331_Hymenoptera	Hymenoptera	Eulophidae	Euplectrus	bicolor	NA	0	1974	0	0
OTU_569_Diptera	Diptera	Cecidomyiidae	NA	NA	NA	0	1931	0	0
OTU_28_Psocoptera	Psocoptera	Ectopsocidae	Ectopsocus	californicus	NA	0	1580	0	0
OTU_320_Acari	Acari	NA	NA	NA	NA	0	1365	0	0
OTU_6_Thysanoptera	Thysanoptera	Phlaeothripidae	Haplothrips	NA	NA	0	1058	0	0
					Total_Reads	88468	106565	86380	103180
OTU_ID	Order	Family	Genus	Species	Host_species	Spruce_2014	Pine_2016	Spruce_2016	Spruce_2018
OTU_189_Lepidoptera	Lepidoptera	Yponomeutidae	Cedestis	subfasciella	Pinus main host	0	10544	0	0
OTU_67_Hemiptera	Hemiptera	Adelgidae	Pineus	pini	Pinus main host	0	7570	0	0
OTU_162_Lepidoptera	Lepidoptera	Gelechiidae	Exoteleia	dodecella	Pinus main host	0	5701	0	0
OTU_141_Hemiptera	Hemiptera	Lachnidae	Eulachnus	brevipilosus	Pinus main host	0	4416	0	0
OTU_107_Hemiptera	Hemiptera	Lachnidae	Eulachnus	agilis	Pinus main host	0	748	0	0
OTU_142_Hemiptera	Hemiptera	Lachnidae	Eulachnus	sp.	Pinus main host	0	251	0	0
OTU_128_Hemiptera	Hemiptera	Lachnidae	Schizolachnus	pineti	Pinus main host	0	147	0	0
OTU_141_Hemiptera	Hemiptera	Lachnidae	Eulachnus	brevipilosus	Pinus main host	0	68	0	0
OTU_115_Hemiptera	Hemiptera	Miridae	Phytocoris	pini	Pinus main host	0	66	0	0
OTU_188_Lepidoptera	Lepidoptera	Yponomeutidae	Cedestis	sp.	Pinus main host	0	33	0	0
OTU_425_Hymenoptera	Hymenoptera	Eurytomidae	NA	NA	NA	0	10943	0	0
OTU_223_Hymenoptera	Hymenoptera	Torymidae	Torymus	subnudus	NA	0	2466	0	0
OTU_516_Diptera	Diptera	Cecidomyiidae	NA	NA	NA	0	1086	0	0
					Total_Reads	17642	53155	99294	74568
