# Supplementary figures and images for: Environmental DNA from archived leaves reveals widespread temporal turnover and biotic homogenization in forest arthropod communities
Source: eLife journal article supplement (doi:10.7554/elife.78521), 2022-11-07

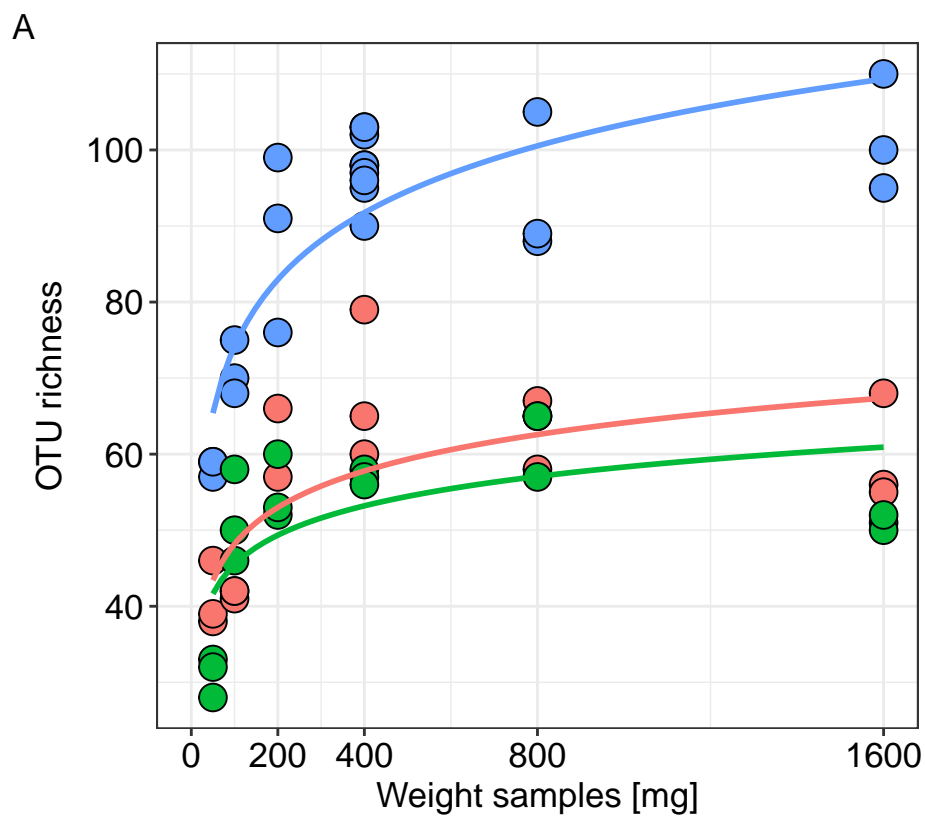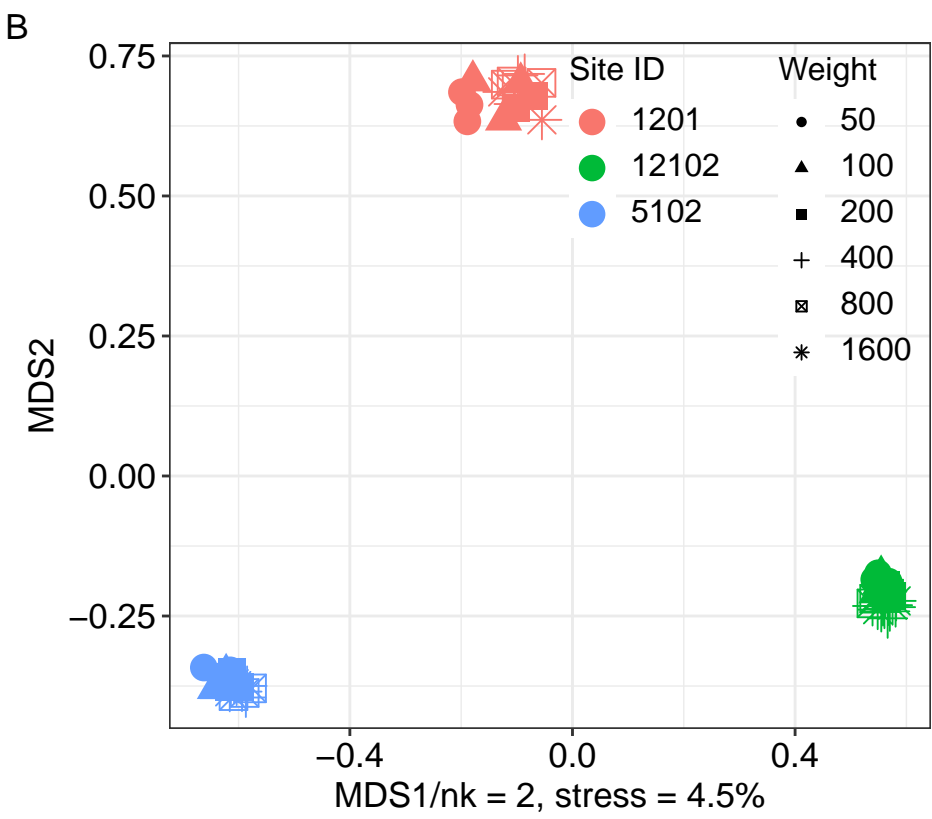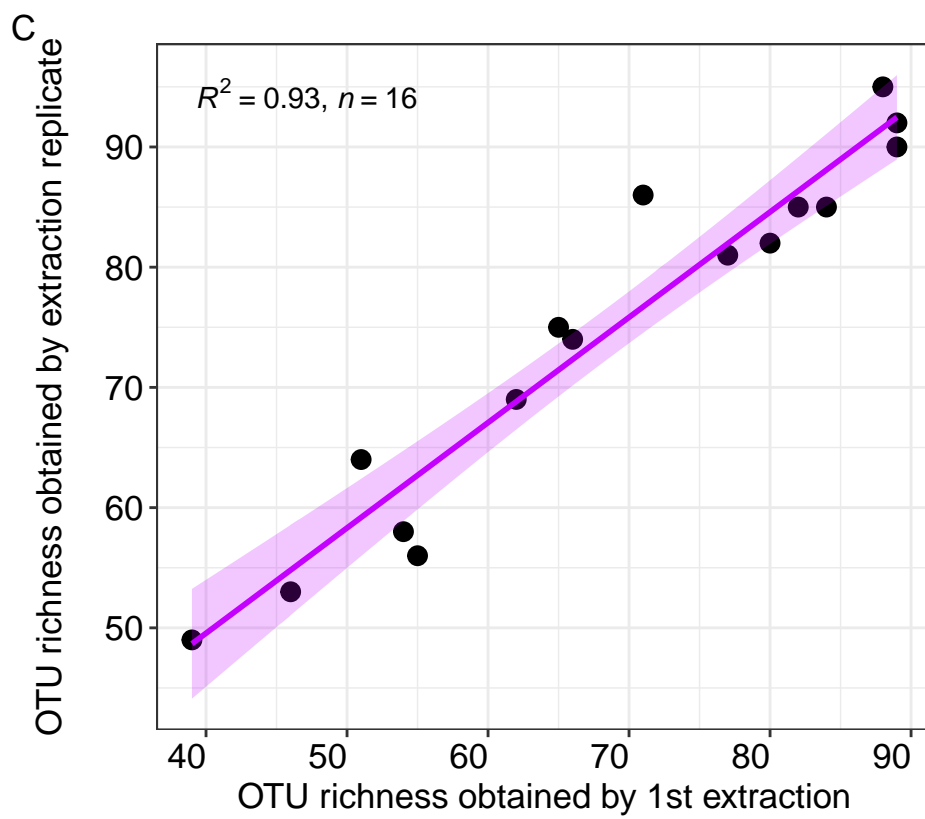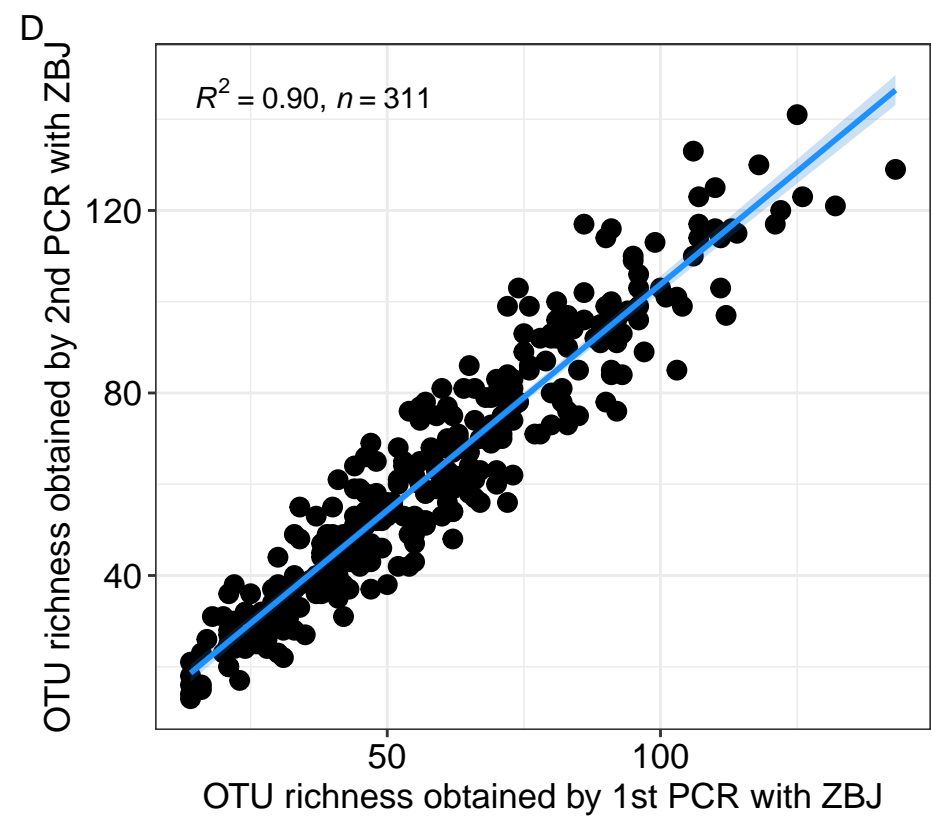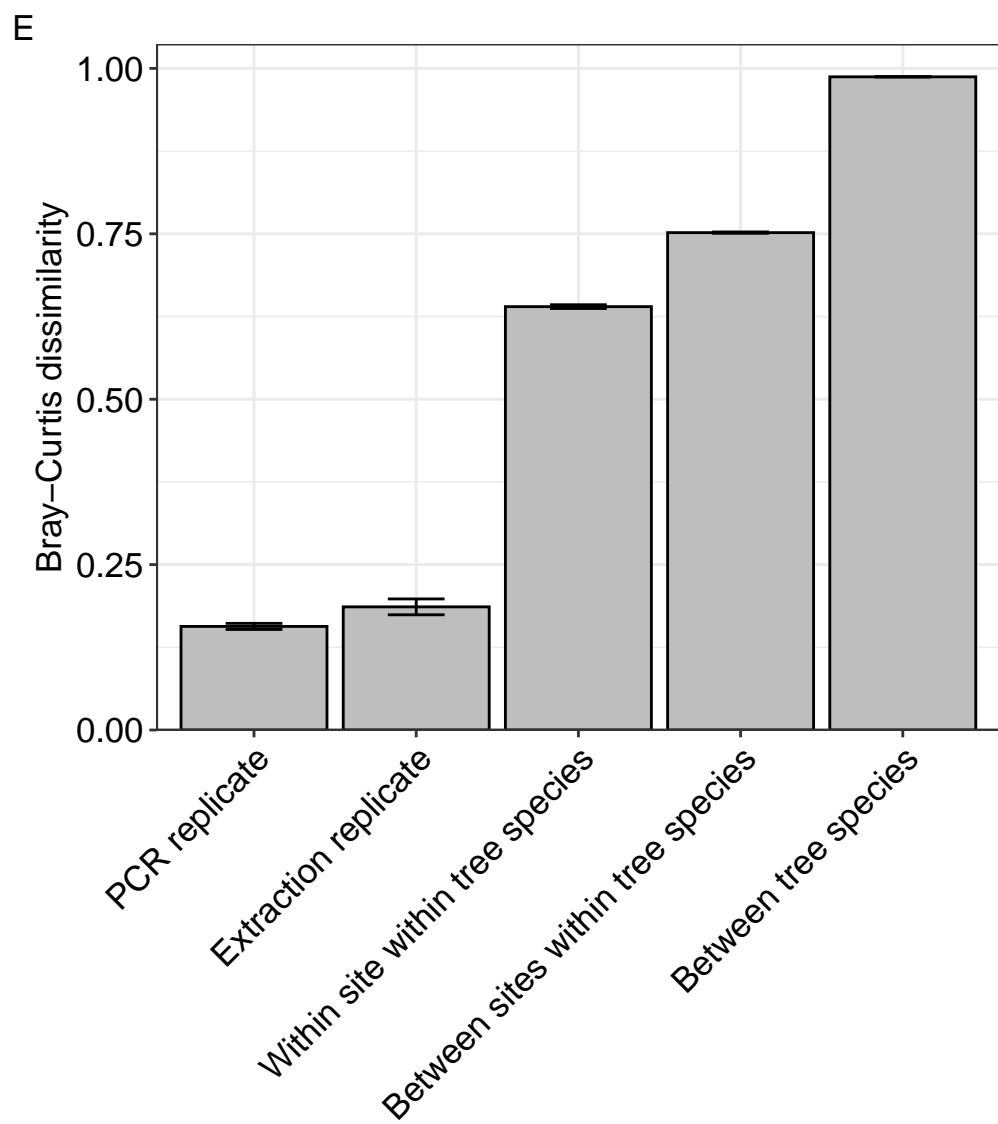

Supplement: supp [file elife-78521-supp-v1.zip]

A

Phytophage   Parasitoid   Omnivore  
 Predator   Detrivore   Ectoparasite

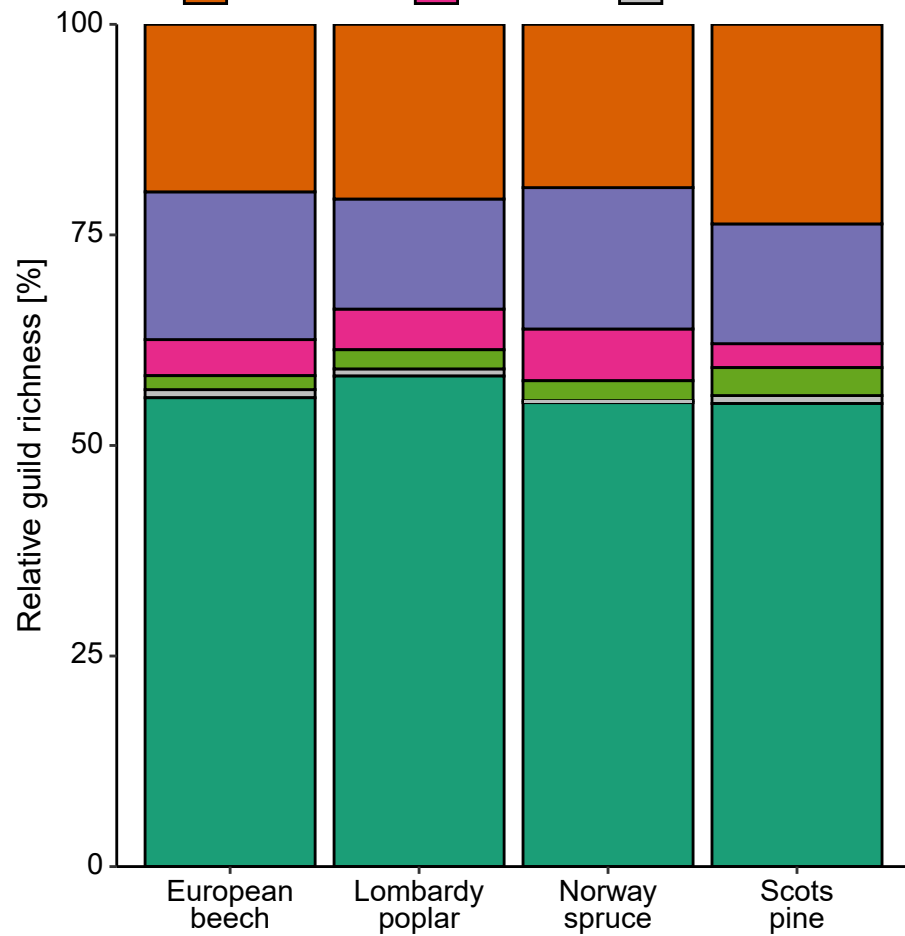

B

on   in   both

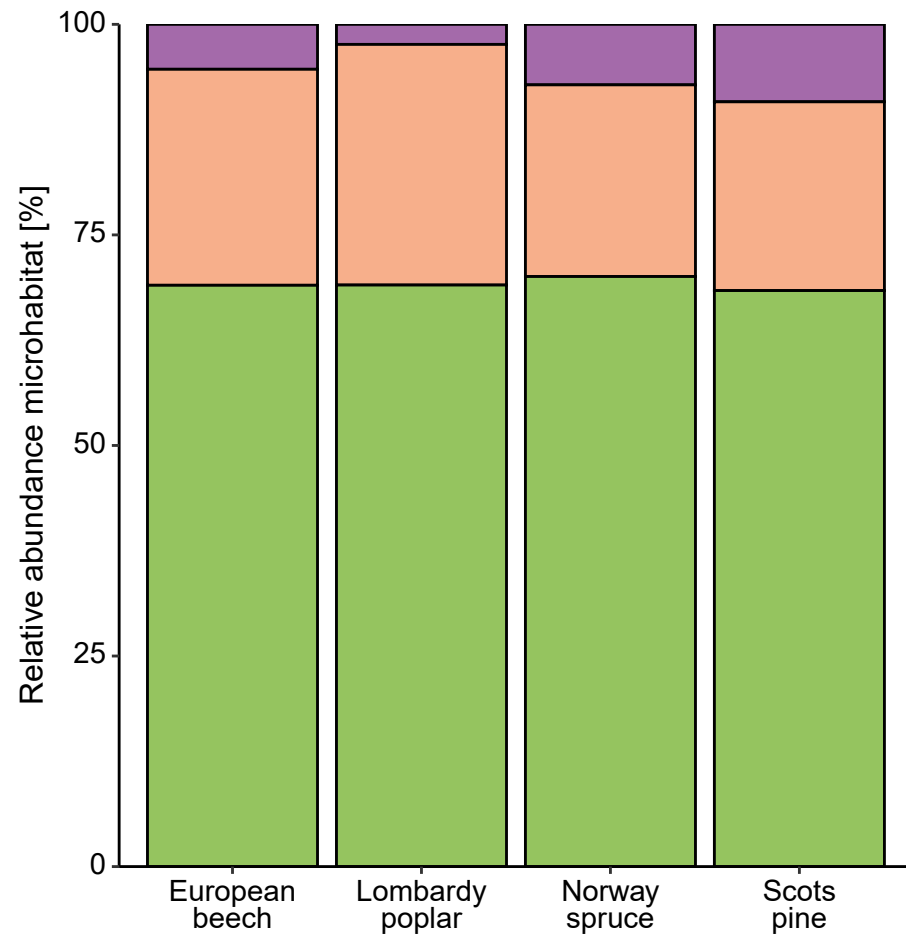

Supplement: supp [file elife-78521-supp-v1.zip]

A

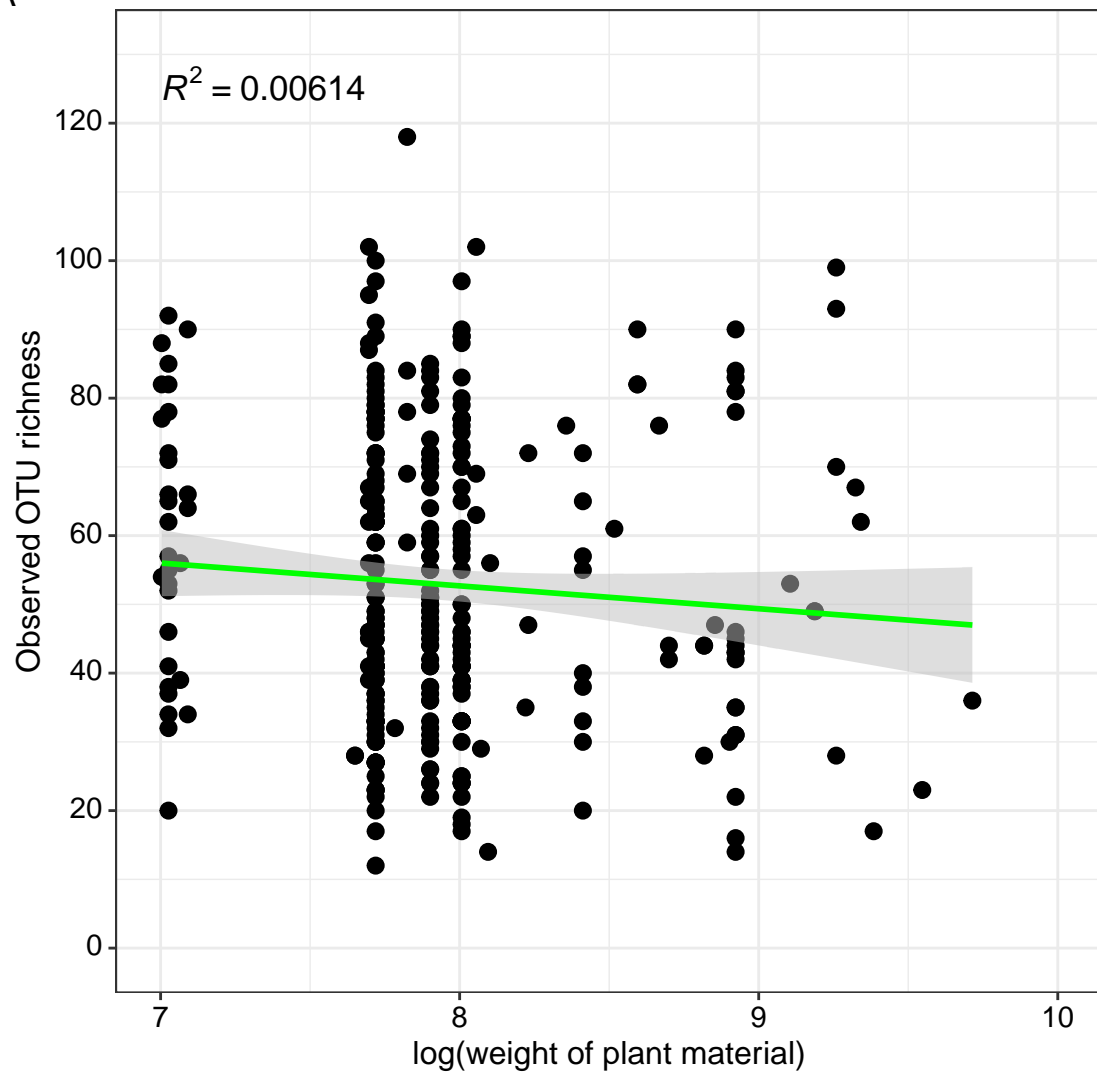

B

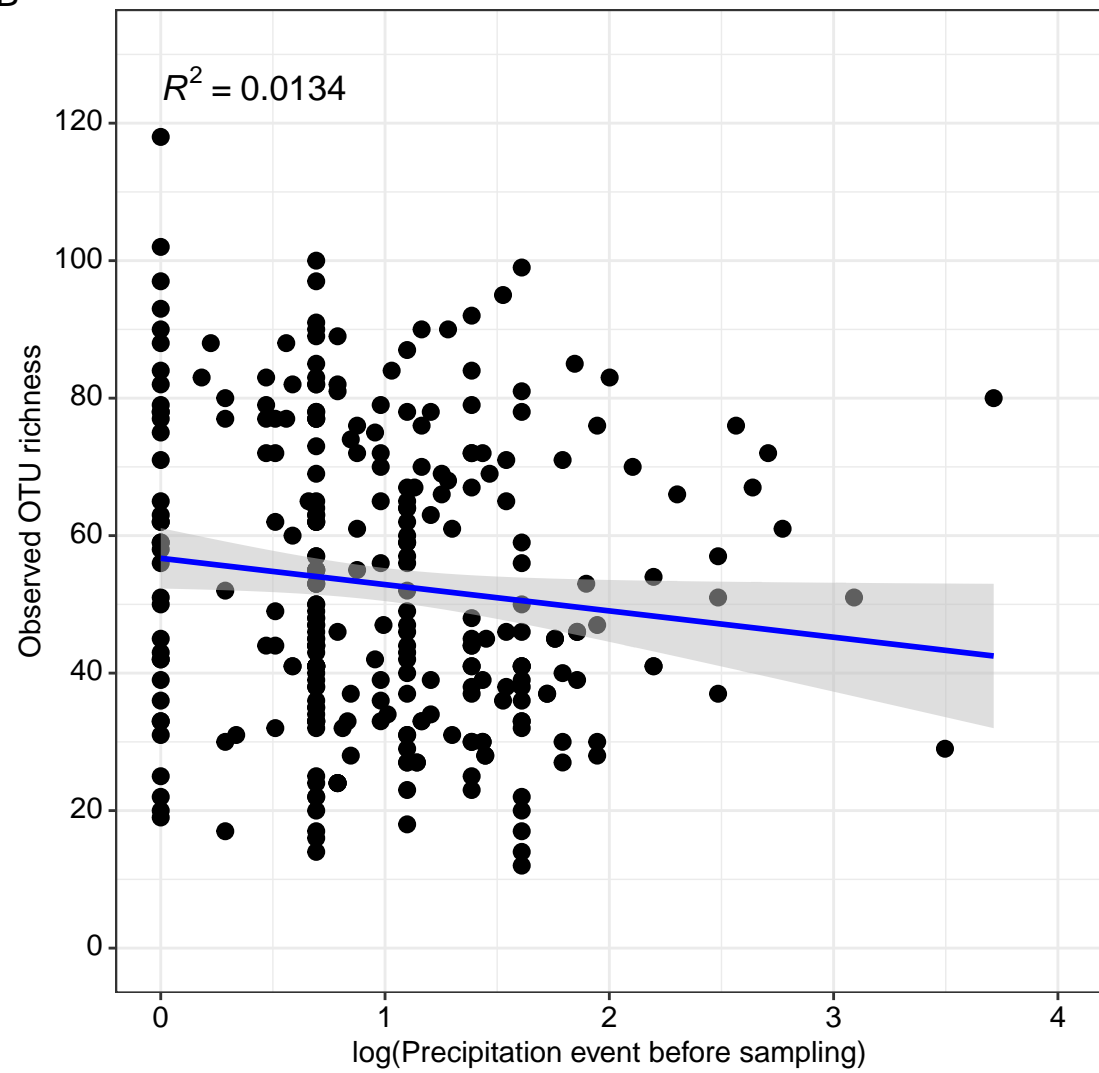

Supplement: supp [file elife-78521-supp-v1.zip]

Tree species    • European beech    • Scots pine    • Lombardy poplar    • Norway spruce

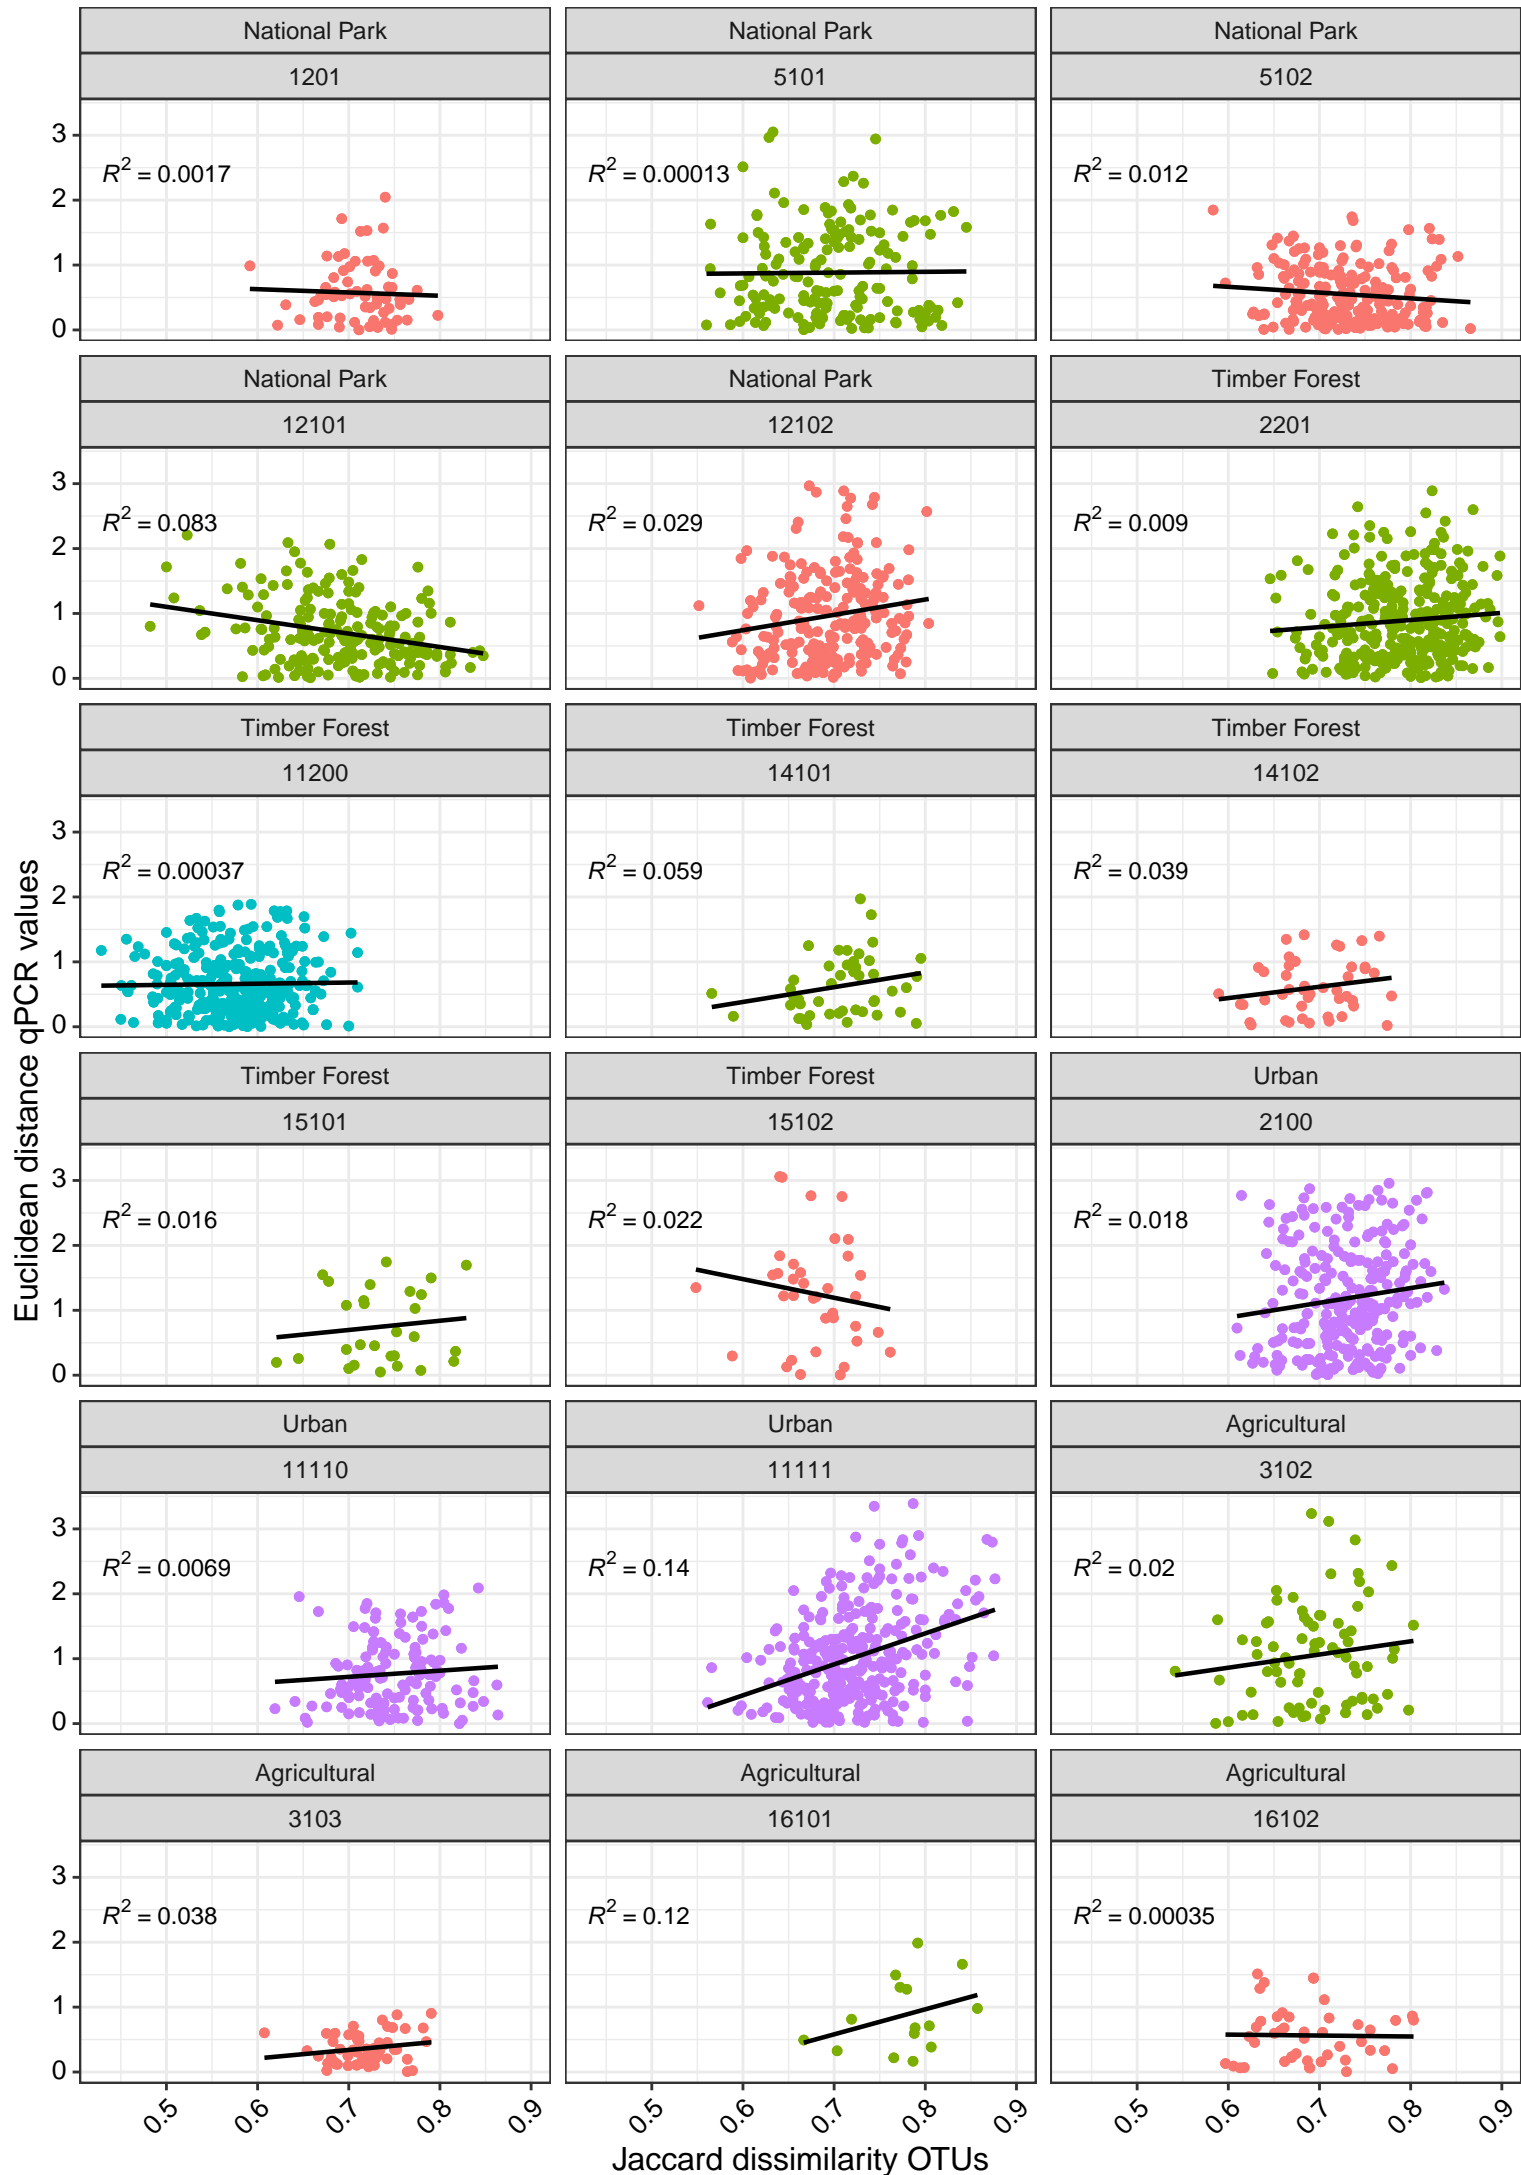

Supplement: supp [file elife-78521-supp-v1.zip]

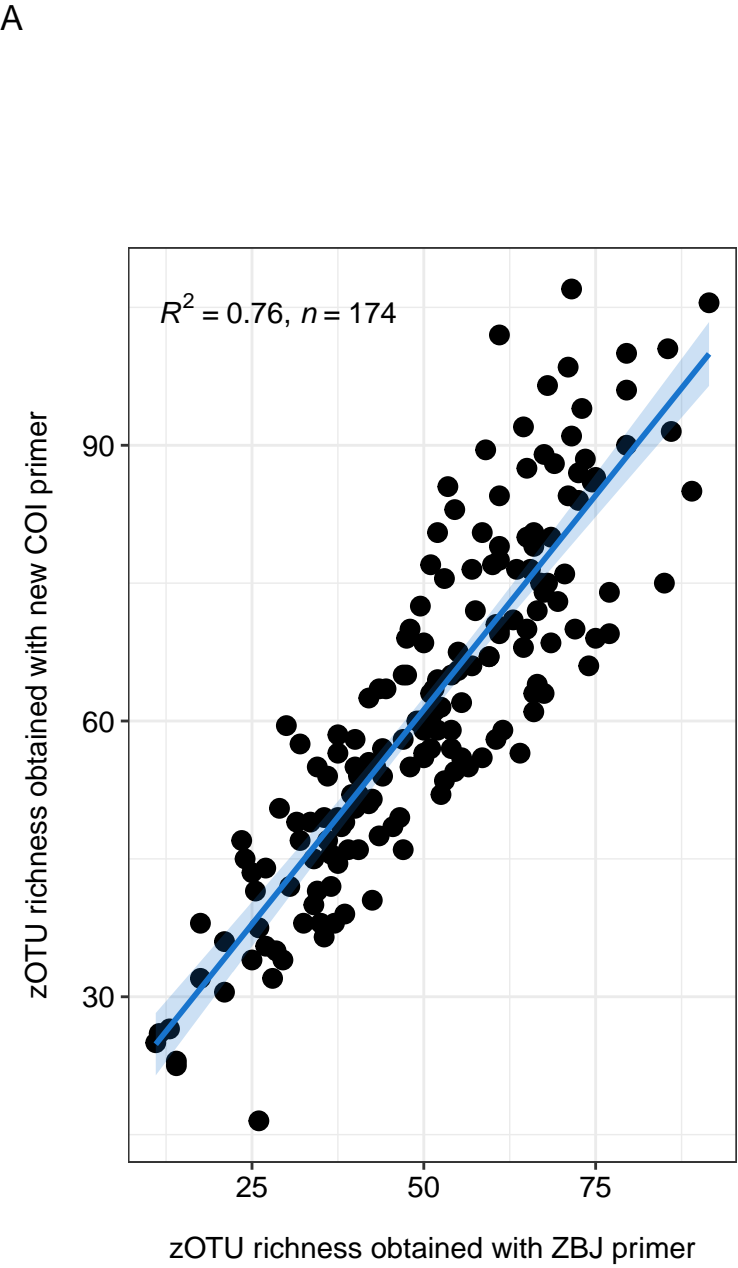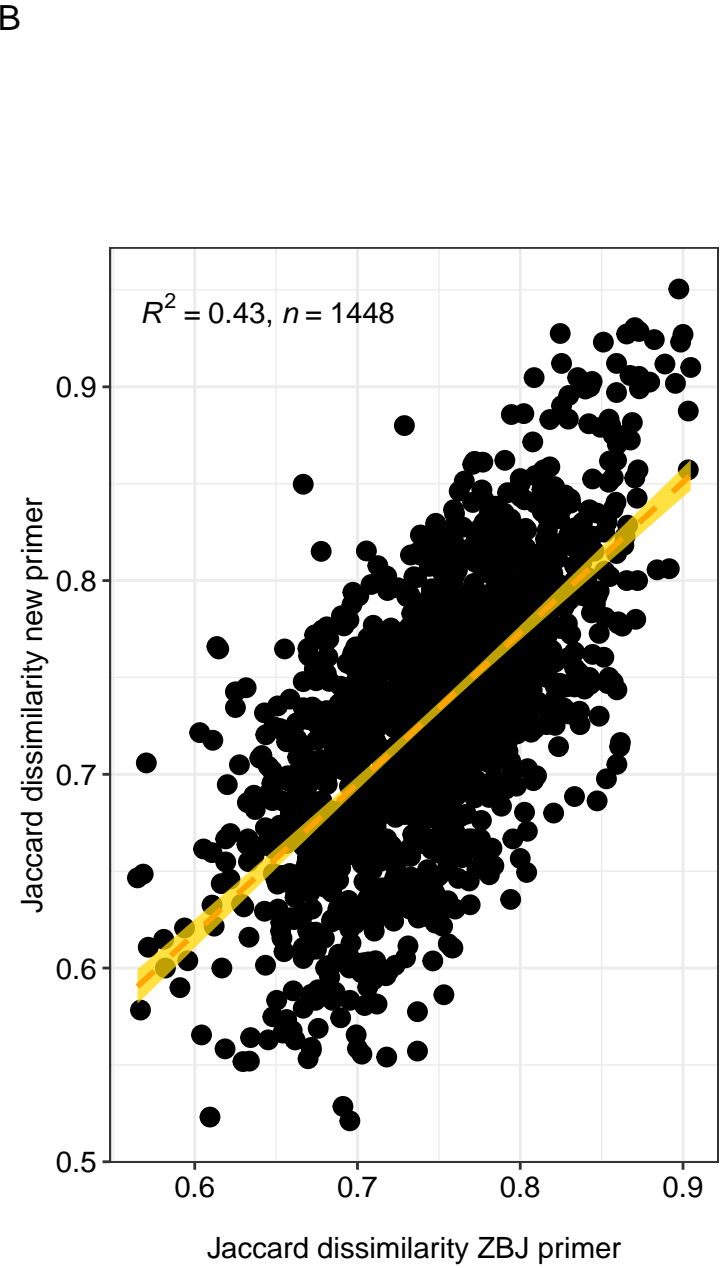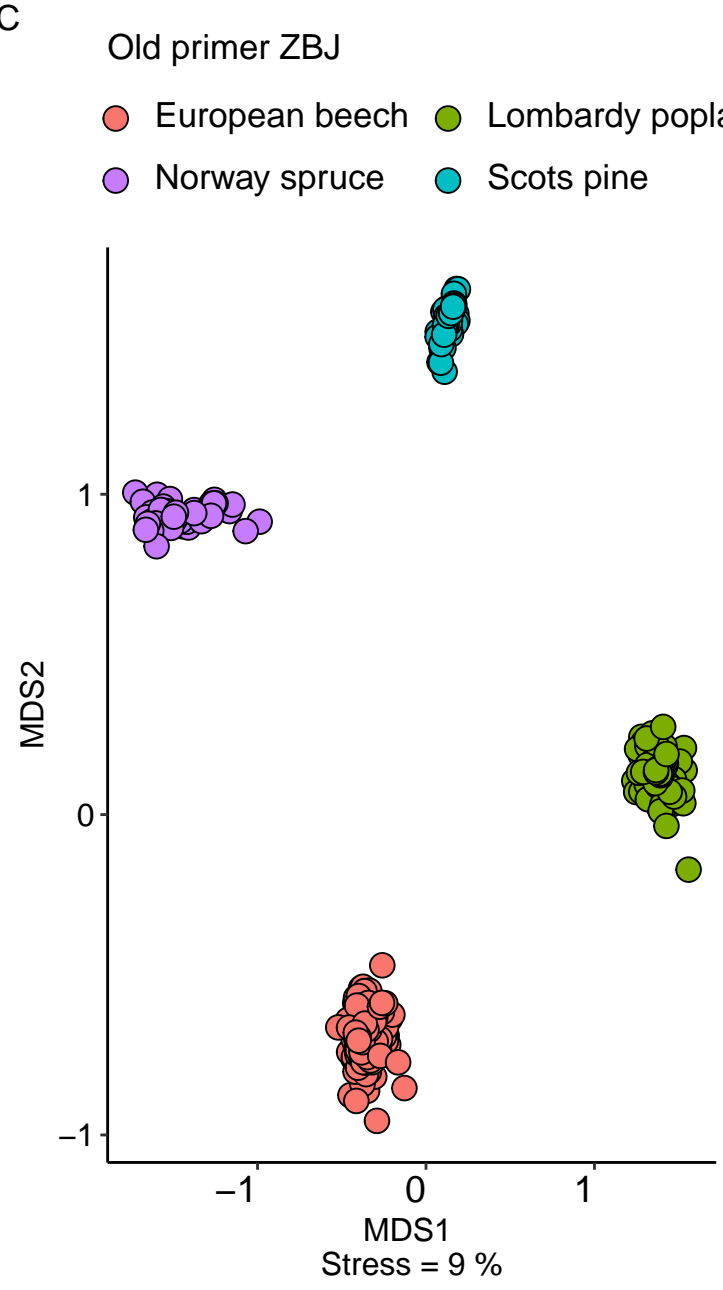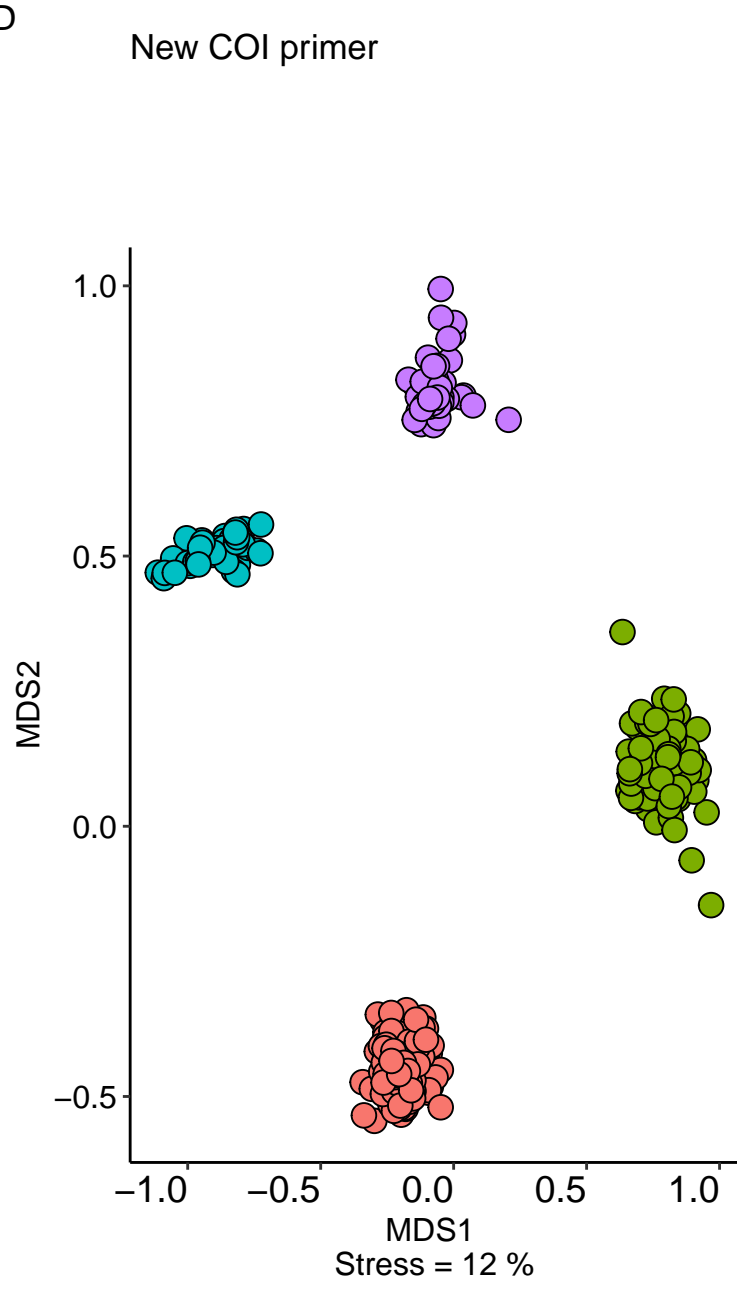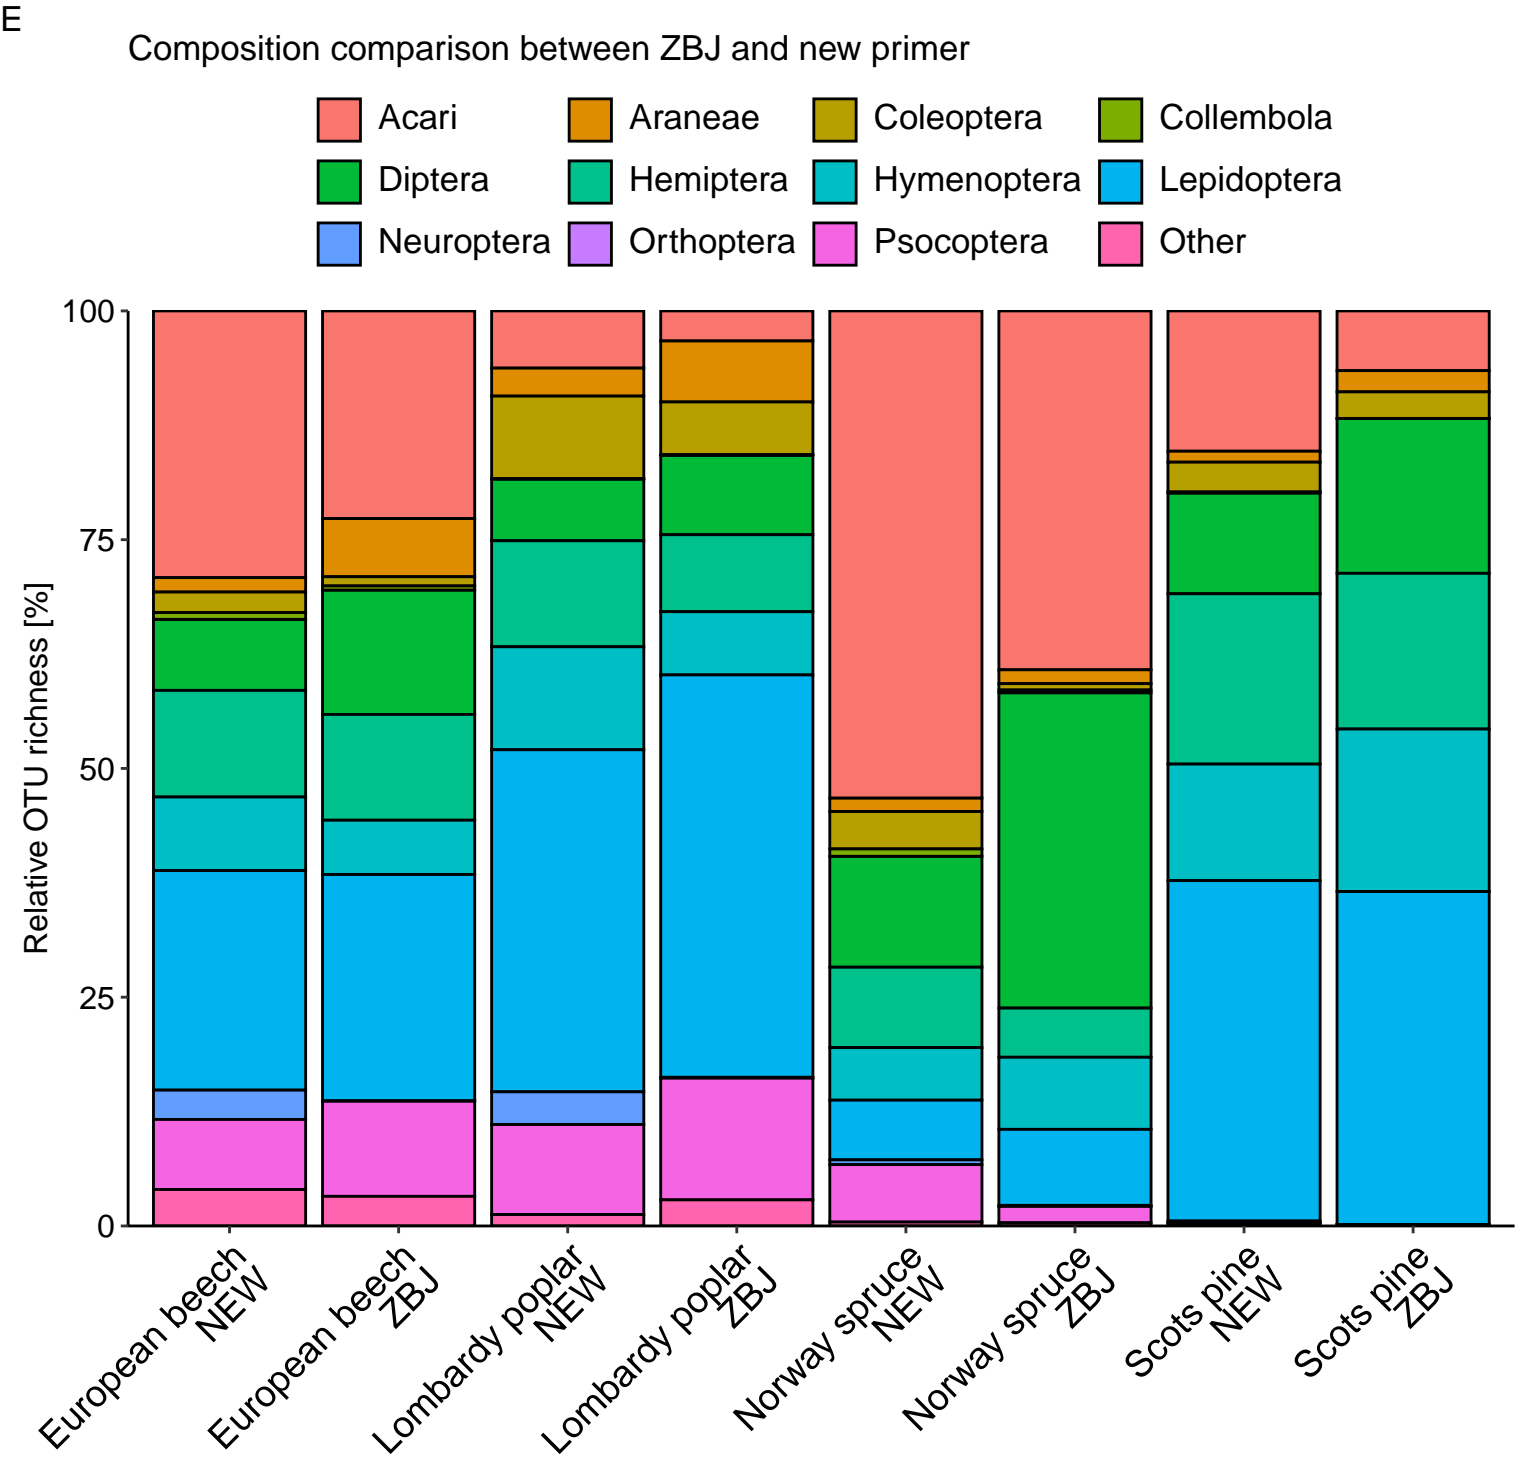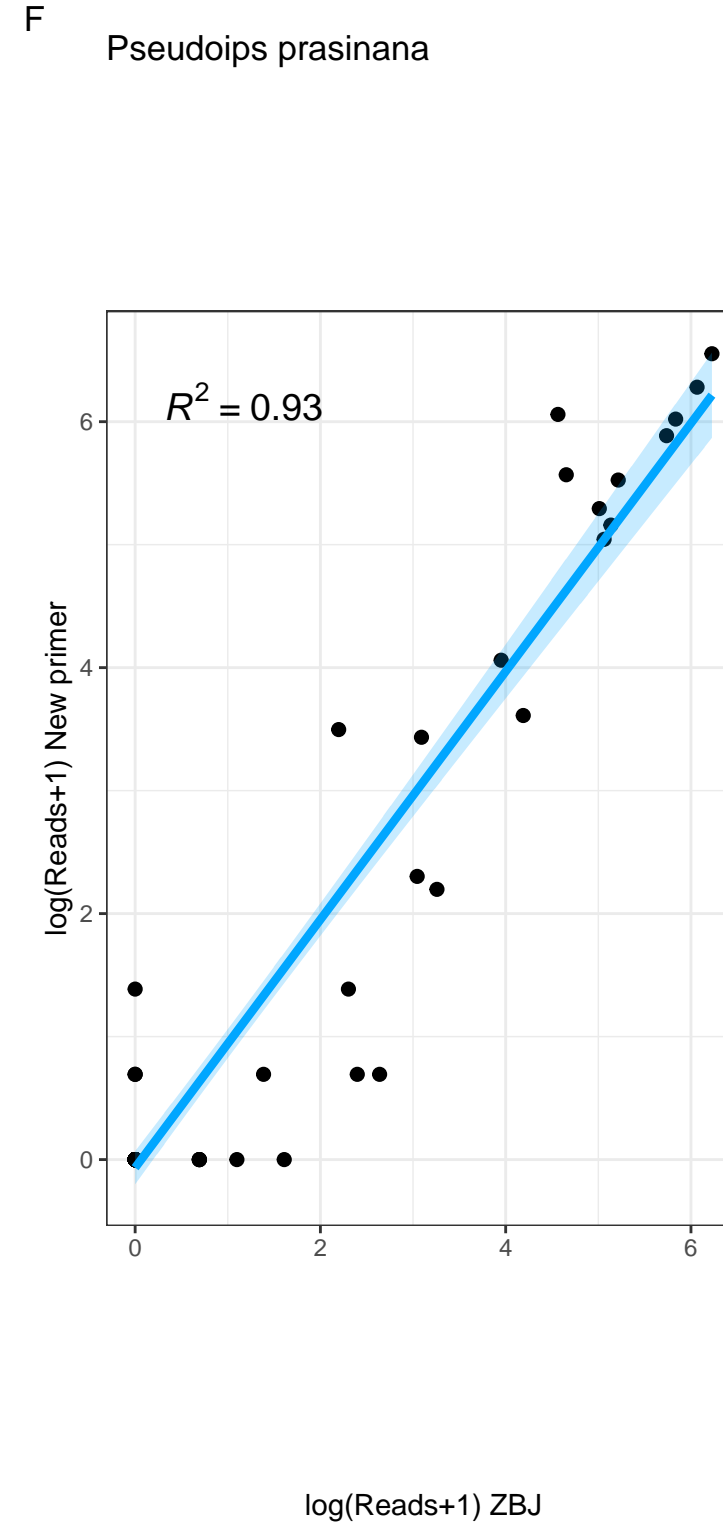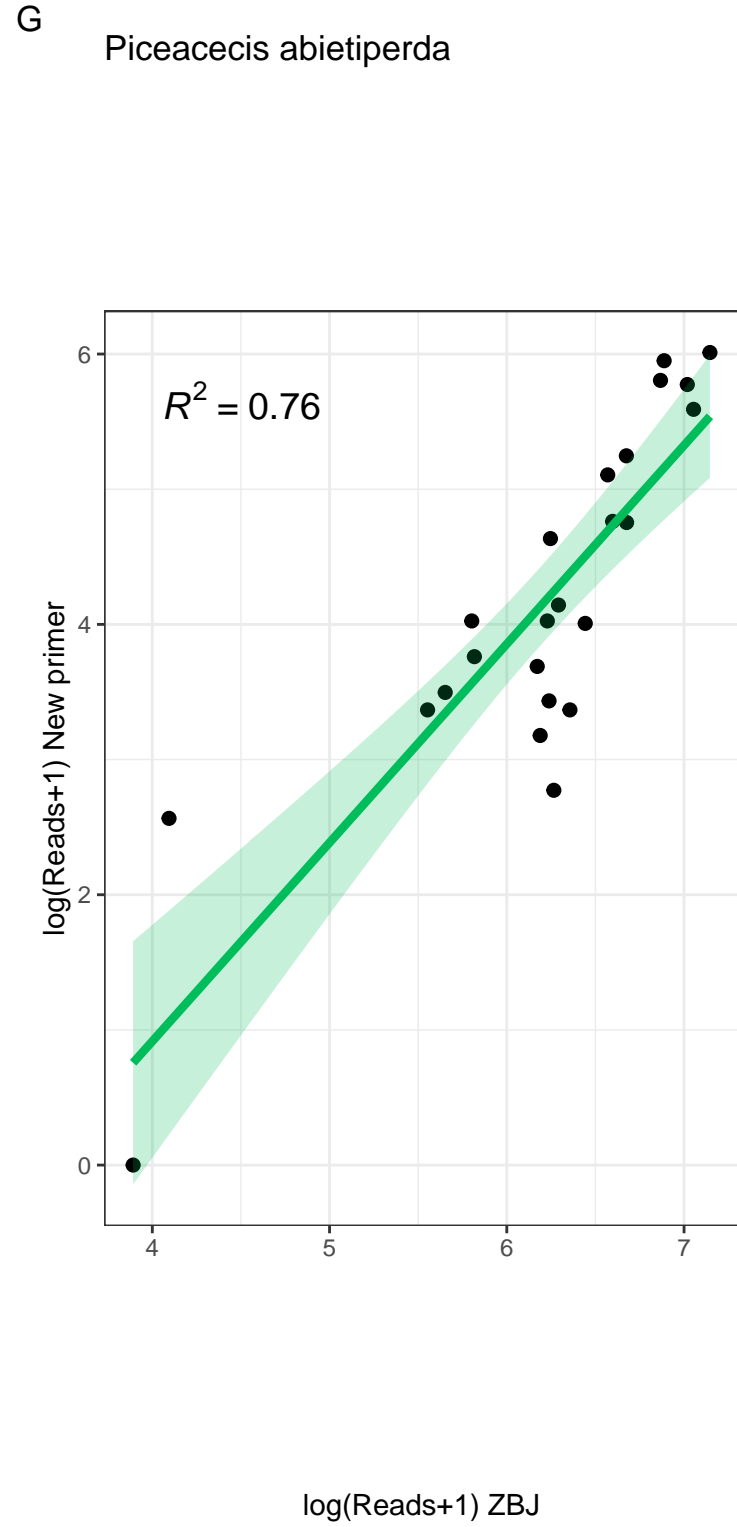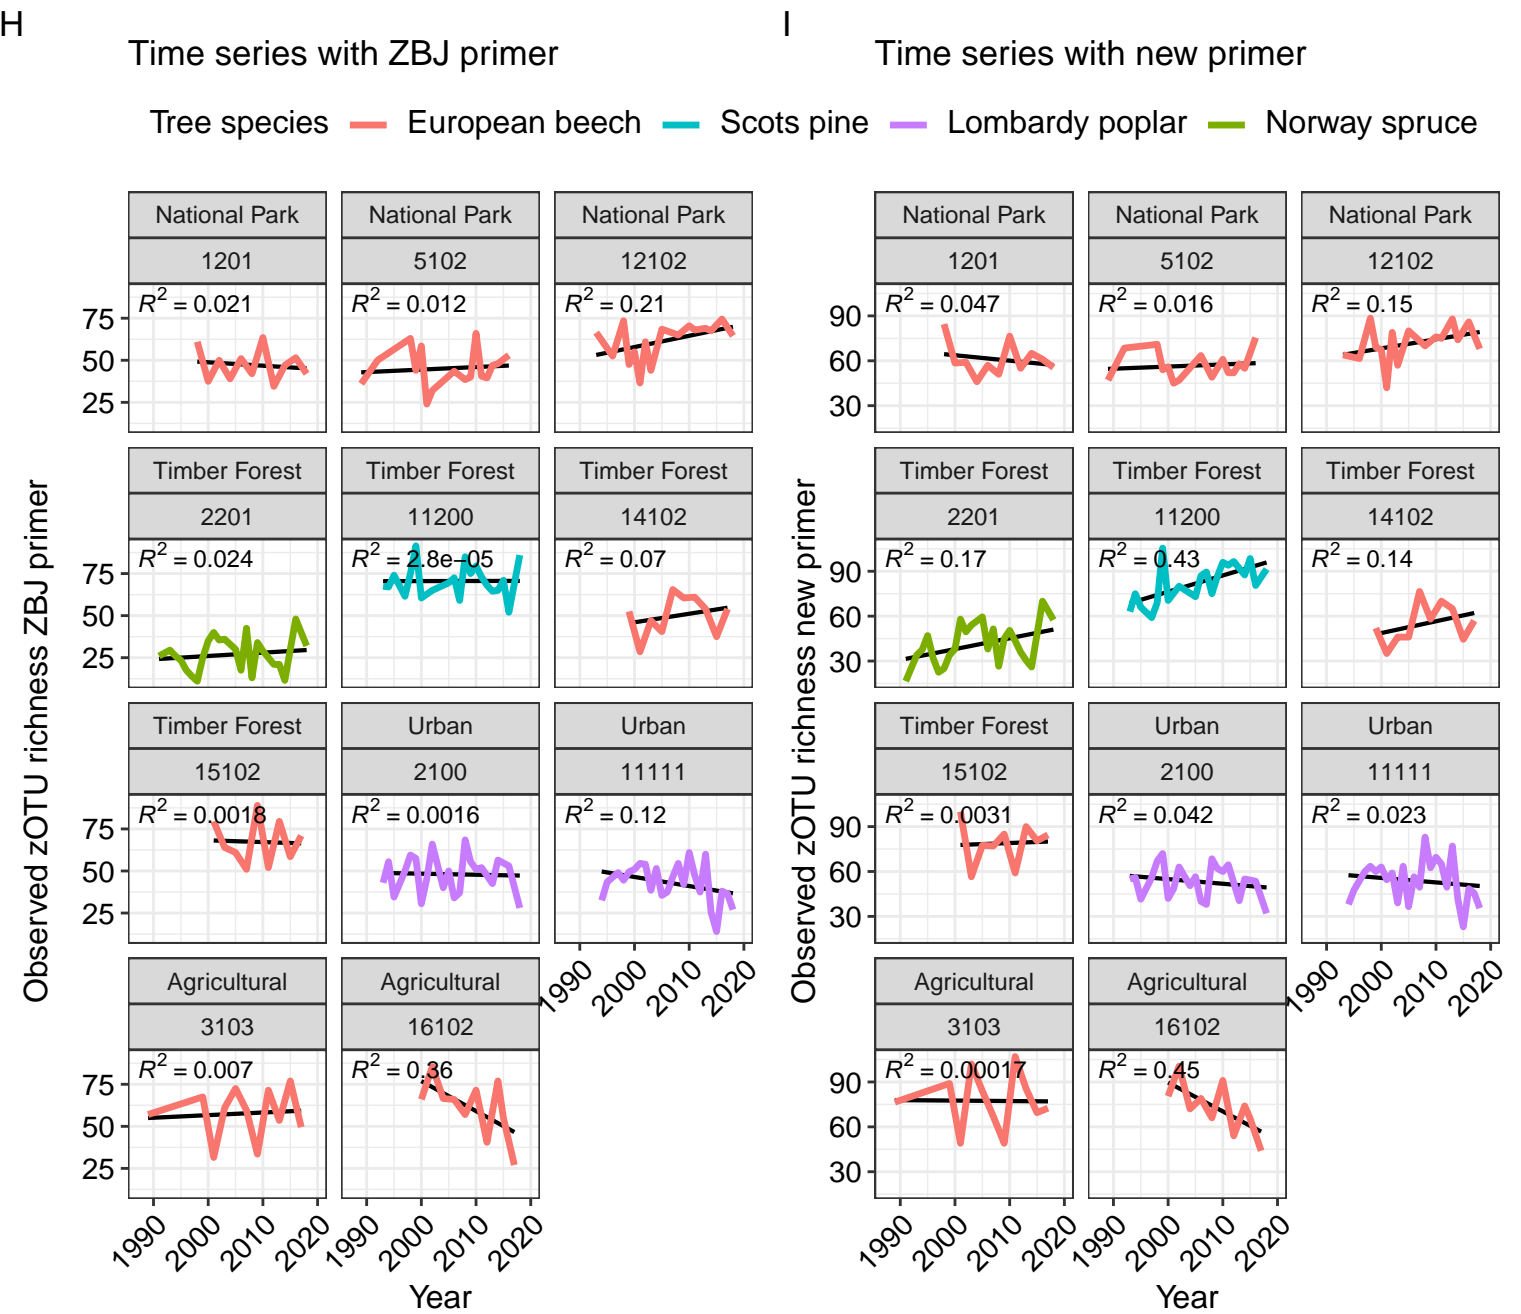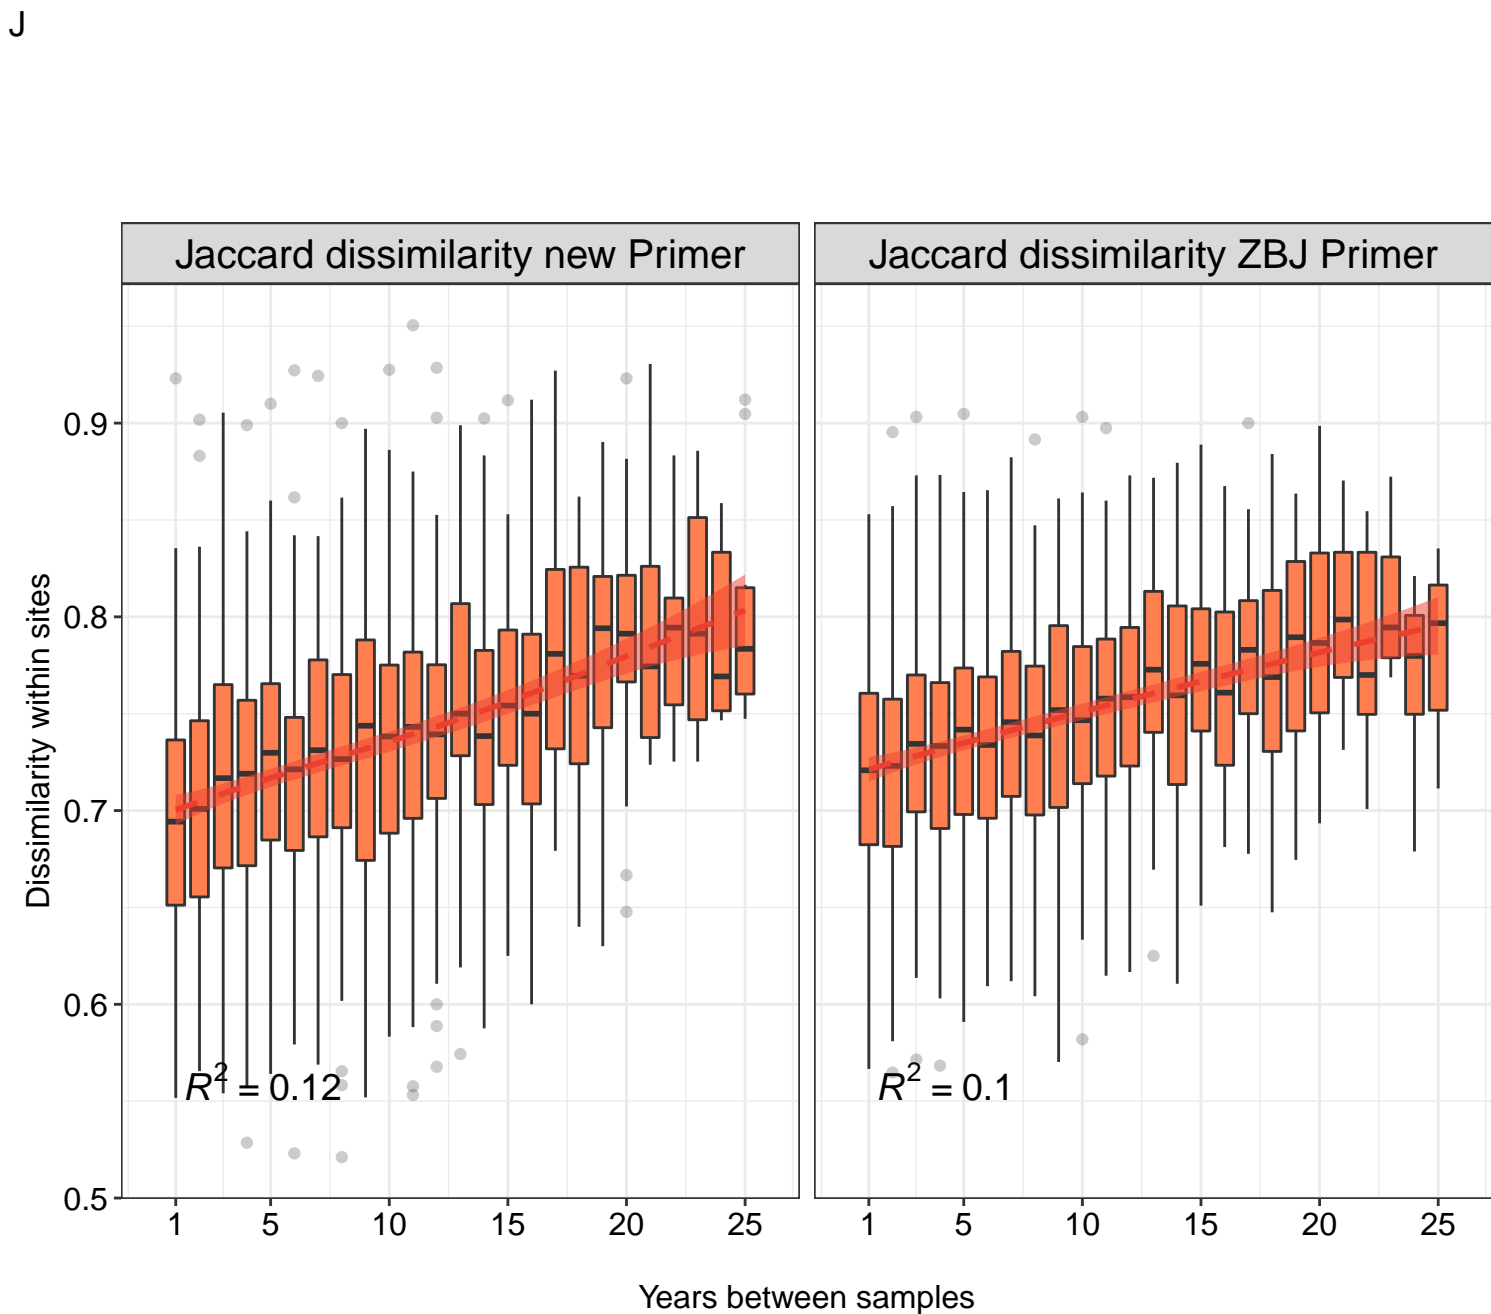

Supplement: supp [file elife-78521-supp-v1.zip]

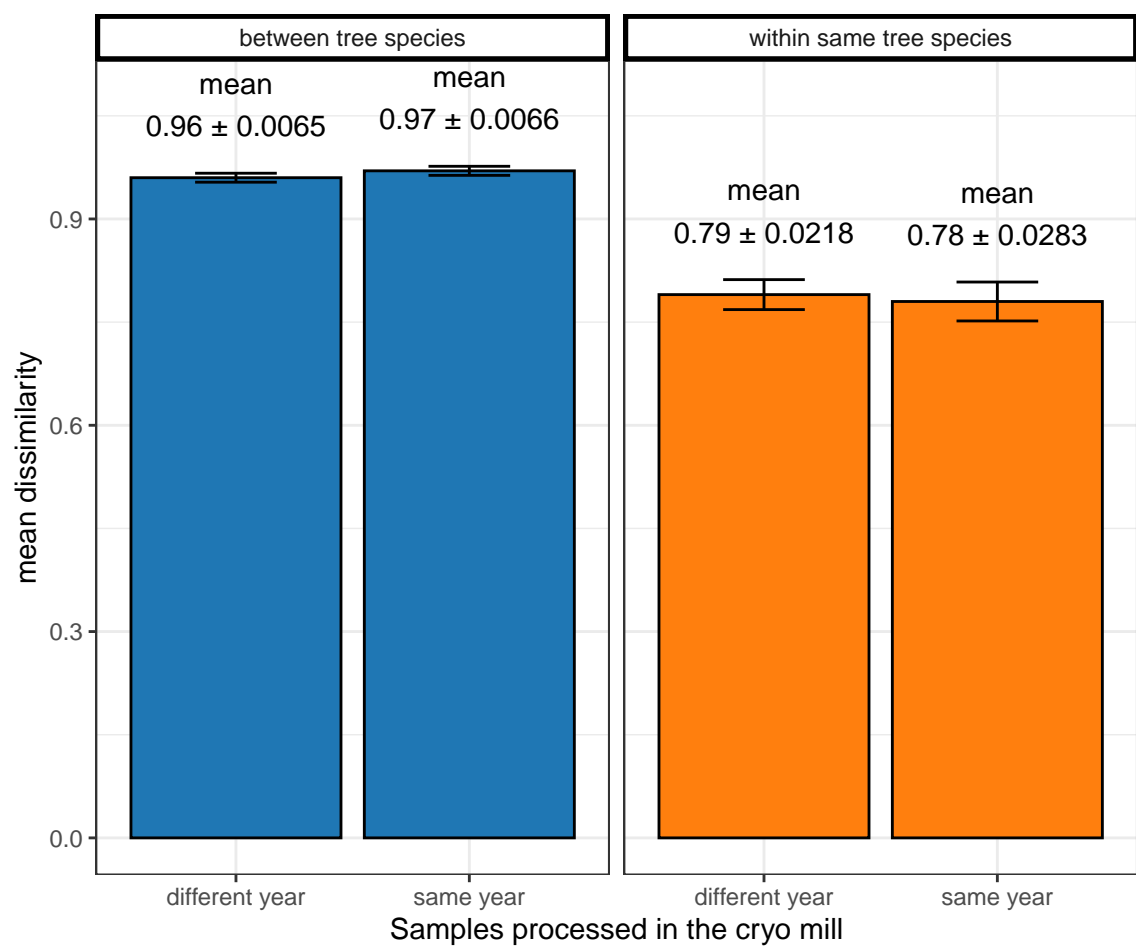

Supplement: supp [file elife-78521-supp-v1.zip › elife_poa_e78521_Figure_2_figure_supplement_3.pdf]

# Rarecurve of all PCR replicates based on zOTUs

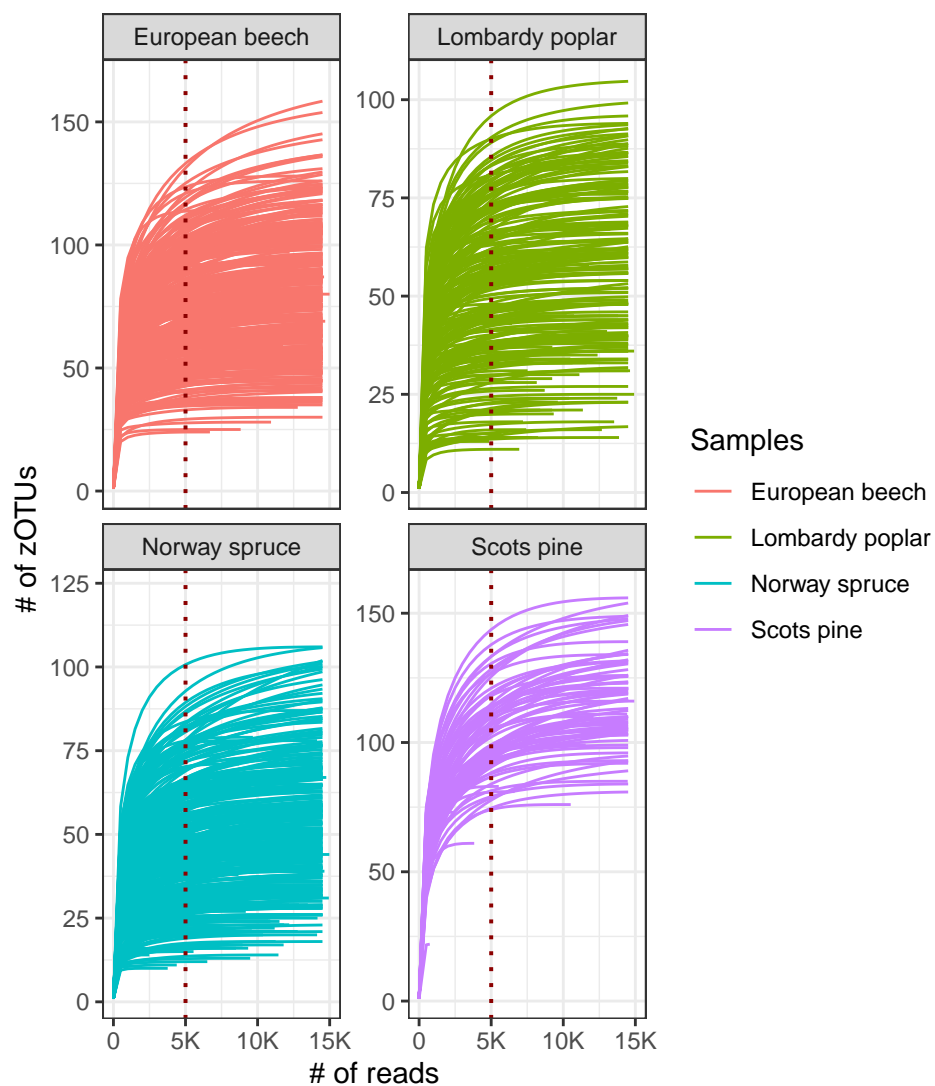

Supplement: supp [file elife-78521-supp-v1.zip › elife_poa_e78521_Figure_2_figure_supplement_4.pdf]

● Agricultural ▲ Urban ■ Timber Forest ◆ National Park

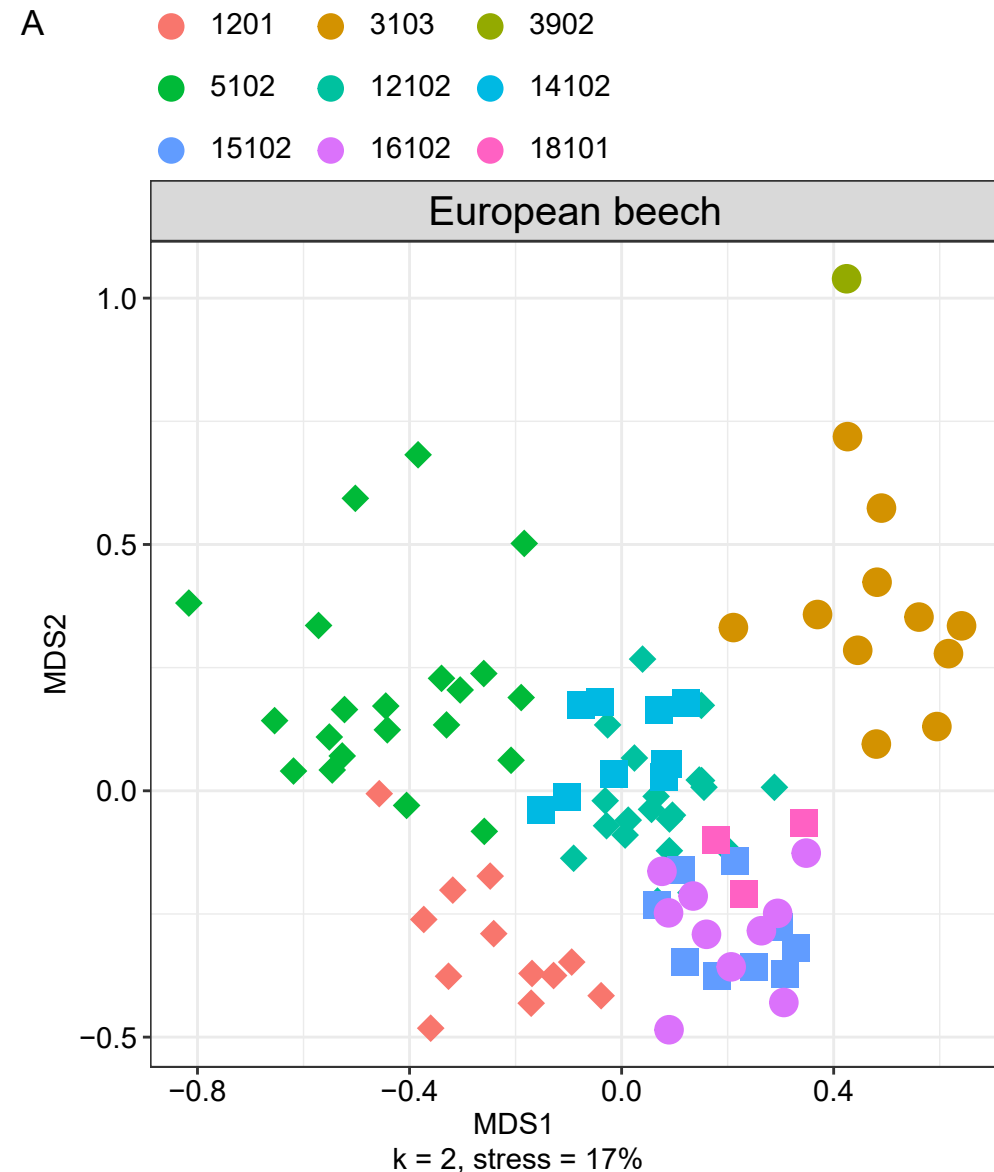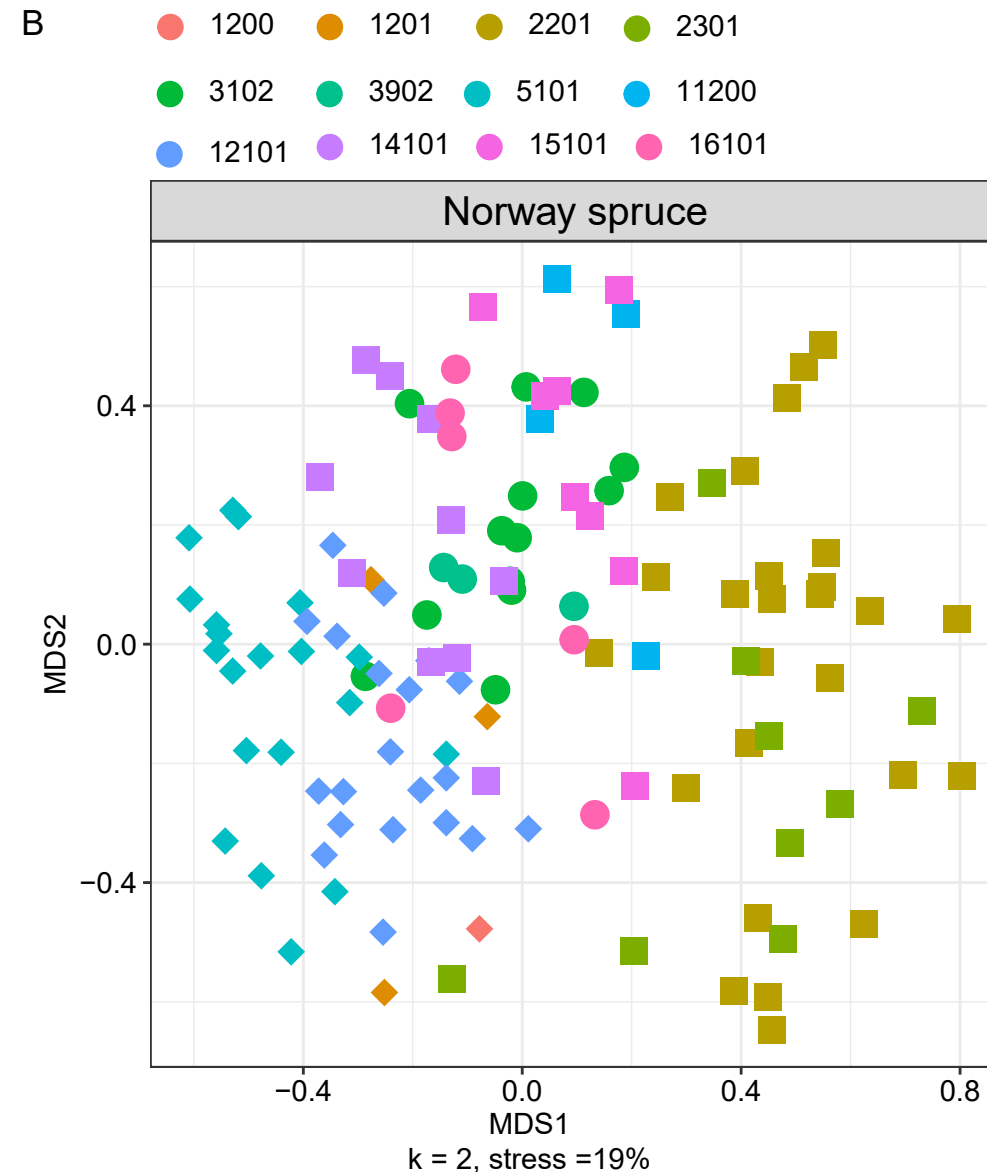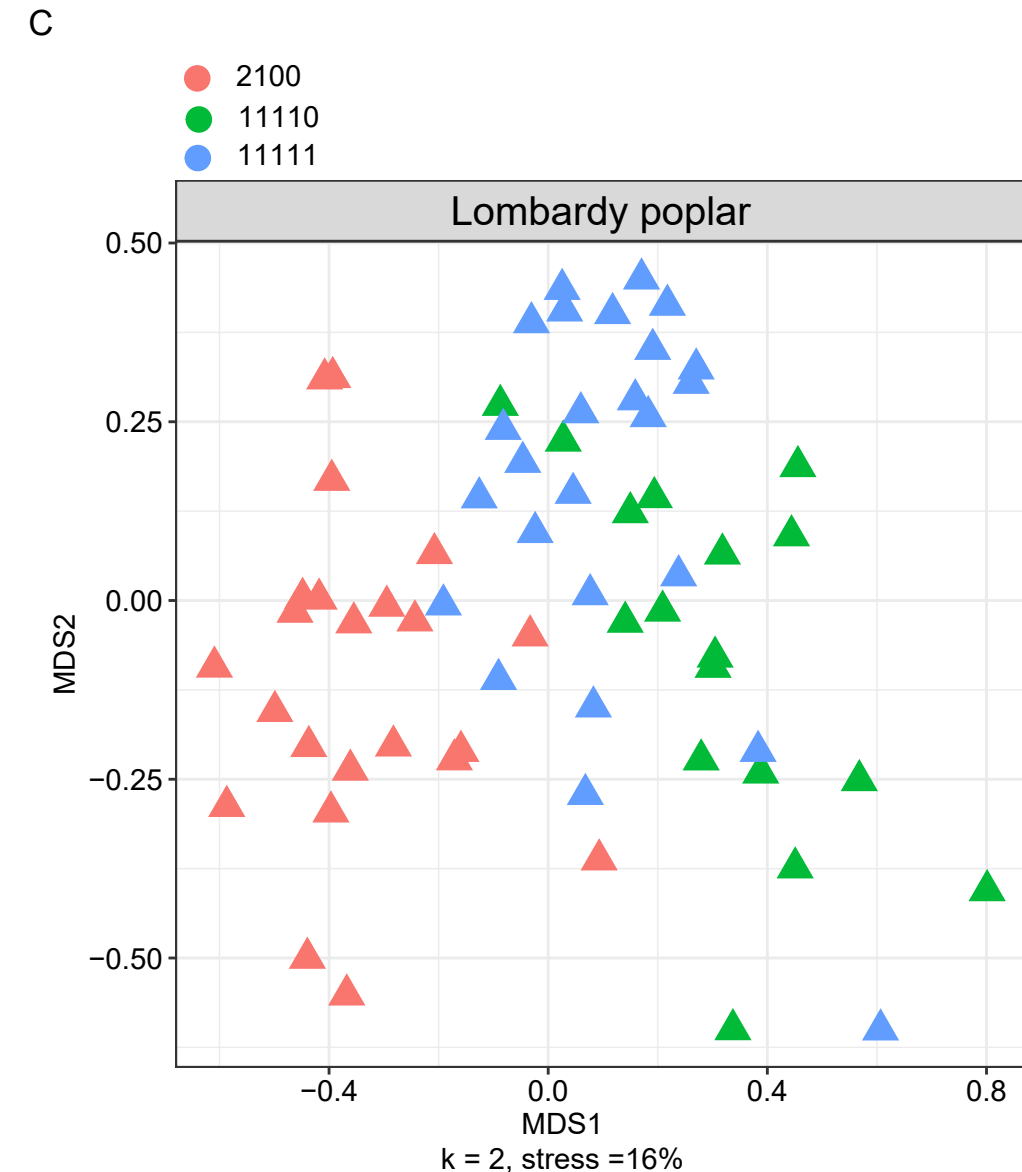

Supplement: supp [file elife-78521-supp-v1.zip › elife_poa_e78521_Figure_2_figure_supplement_7.pdf]

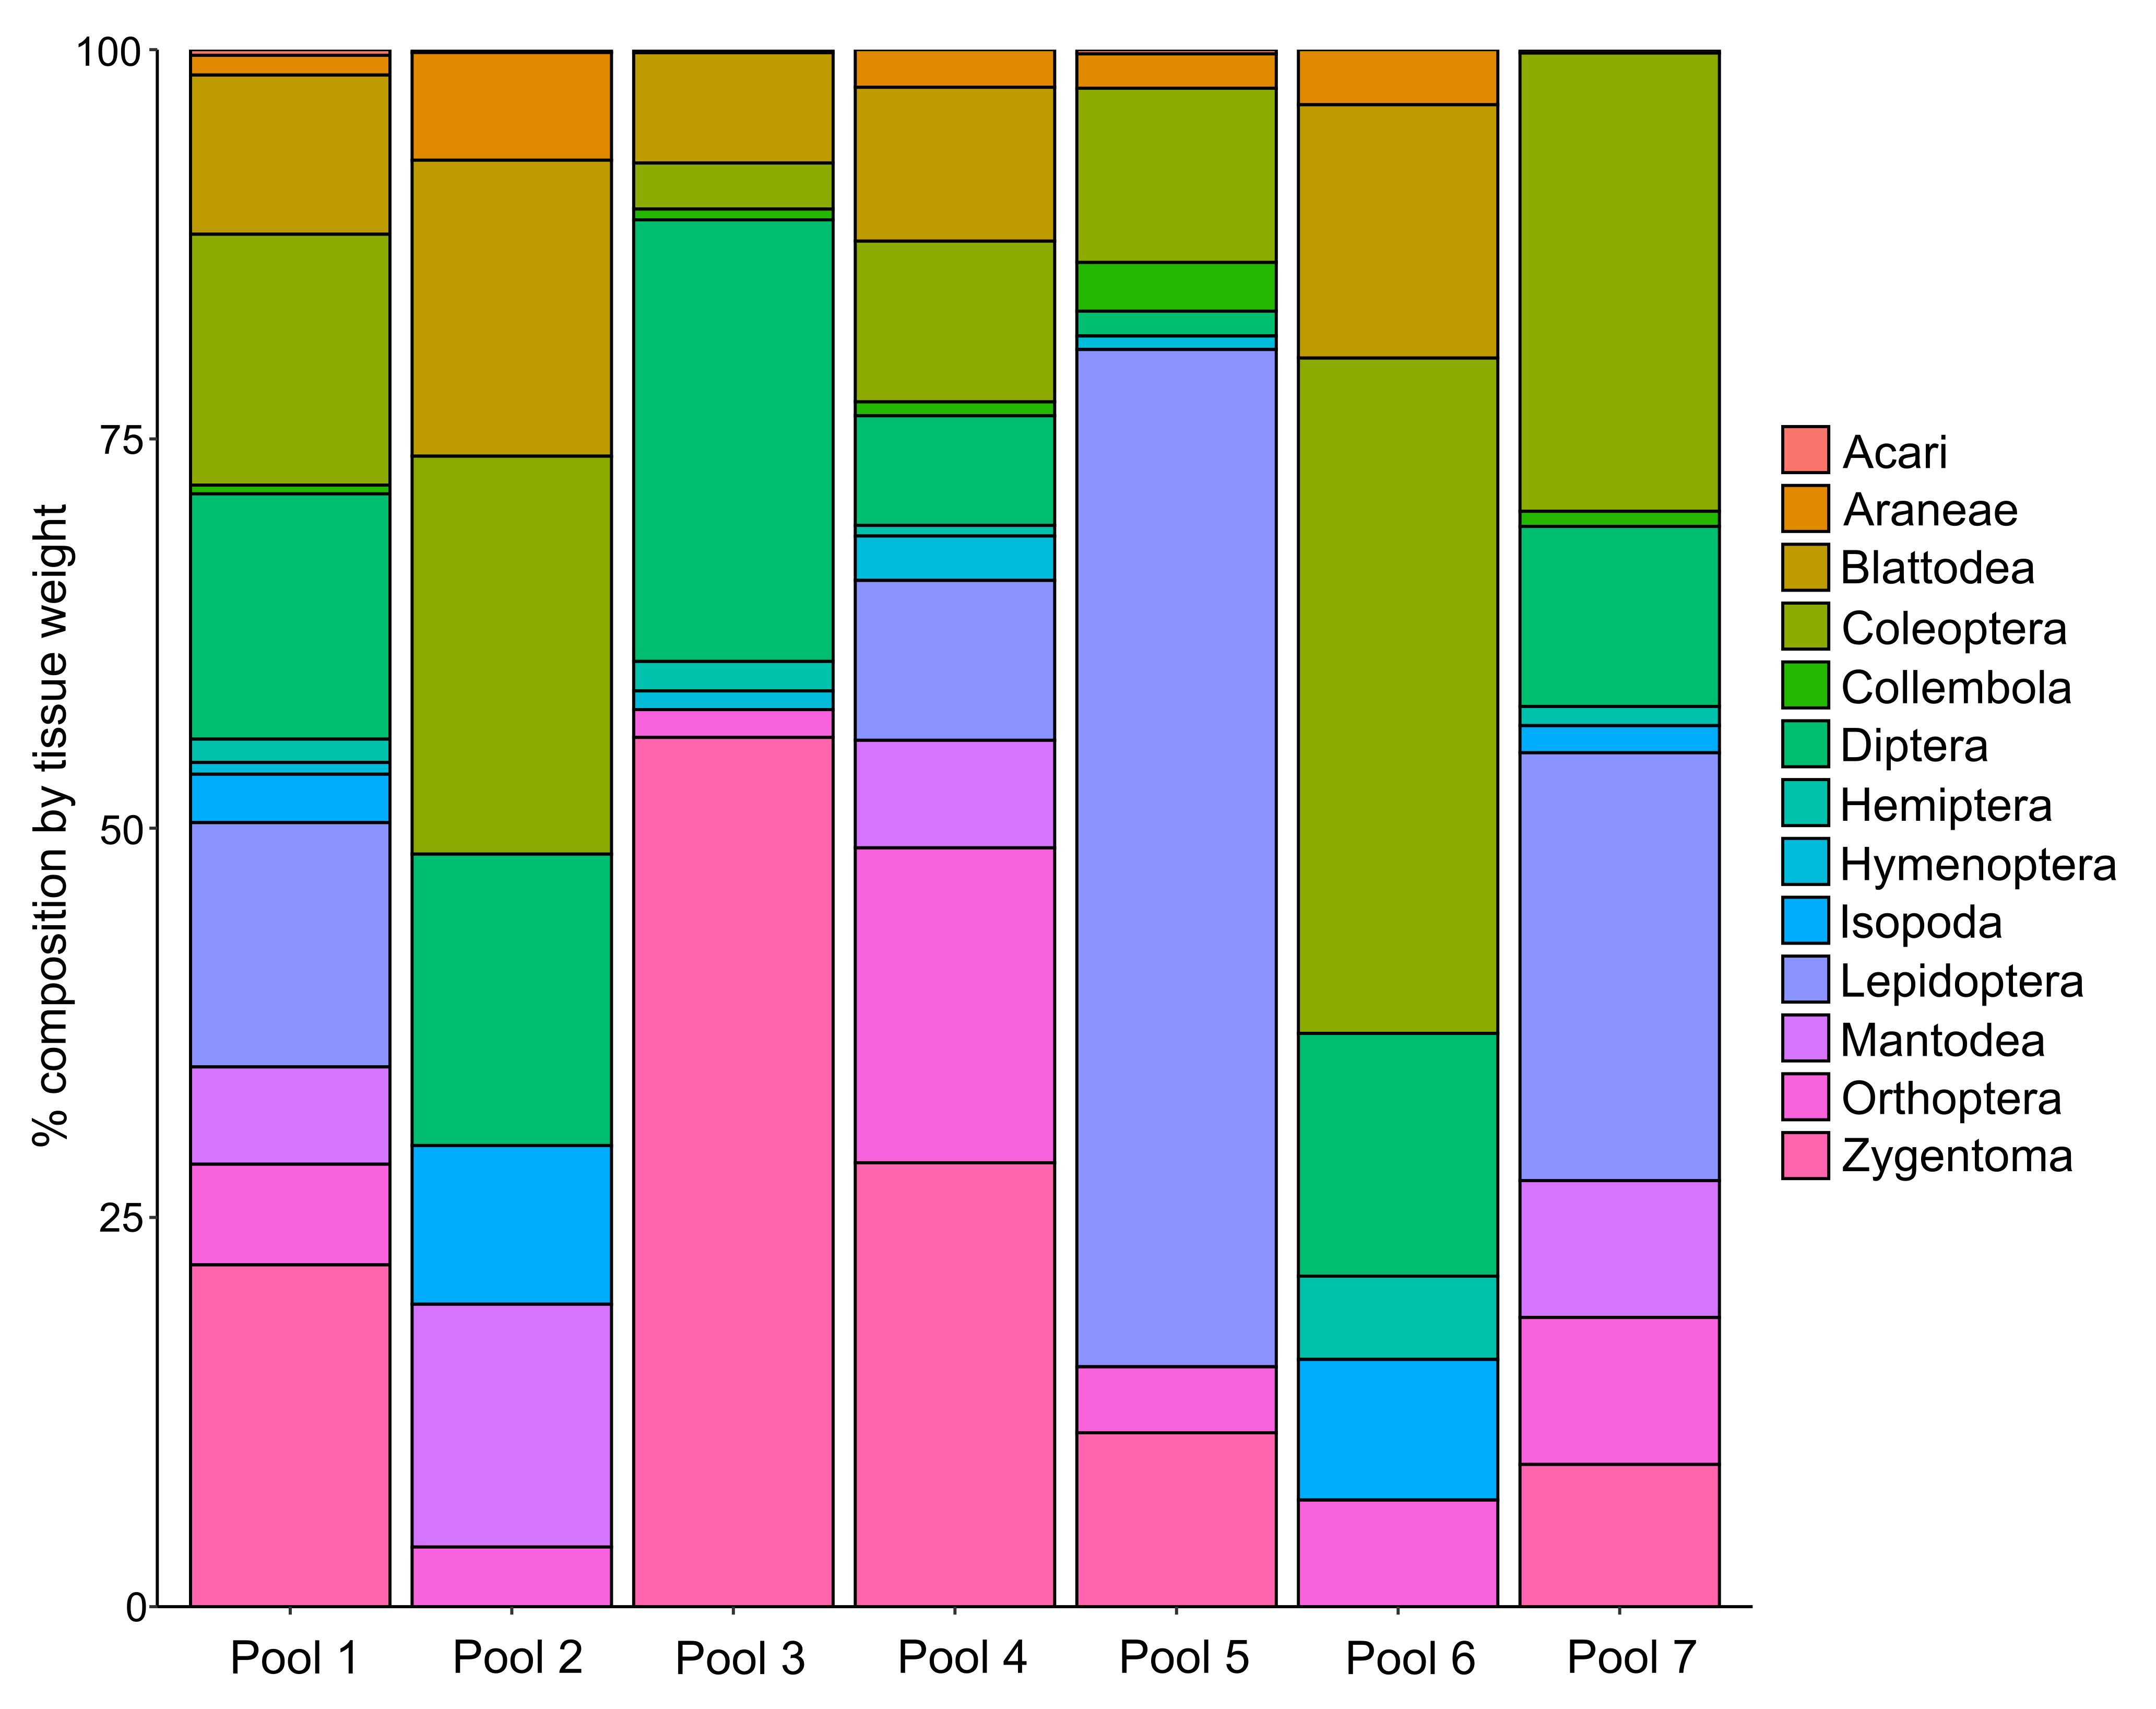

Supplement: supp [file elife-78521-supp-v1.zip › elife_poa_e78521_Figure_3_figure_supplement_1.png]

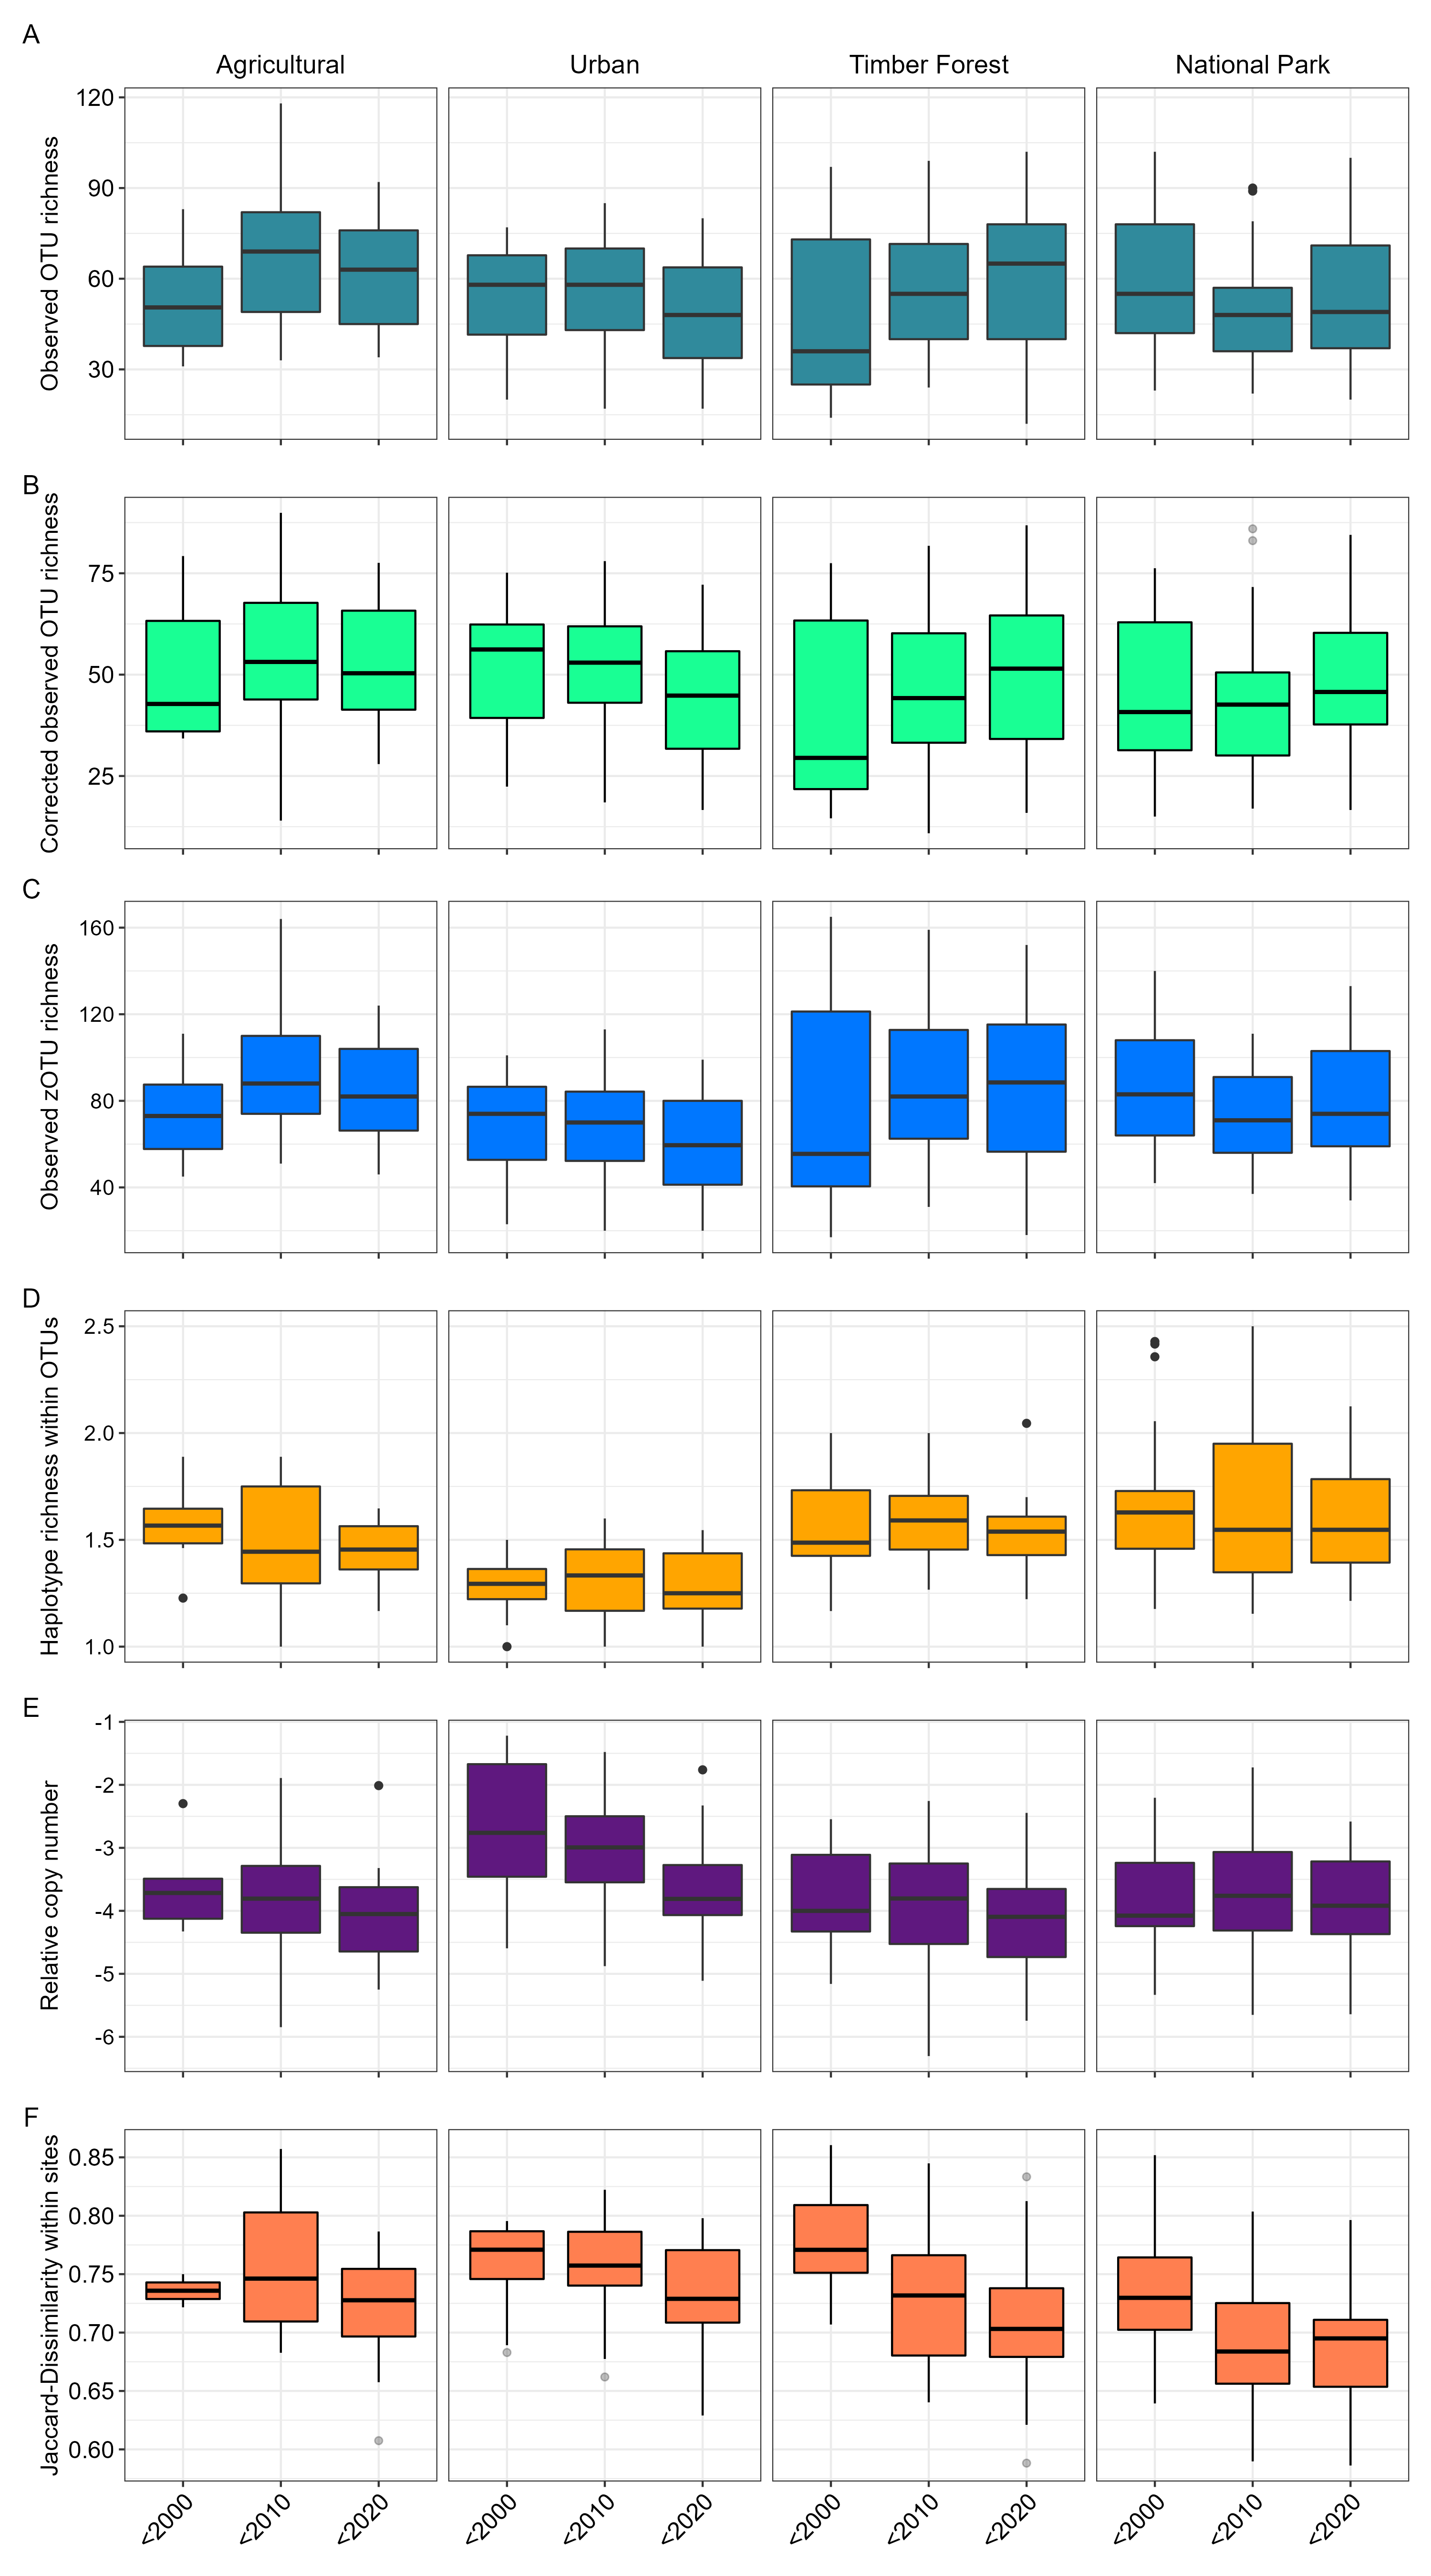

Supplement: supp [file elife-78521-supp-v1.zip › elife_poa_e78521_Figure_4_figure_supplement_1.tif]

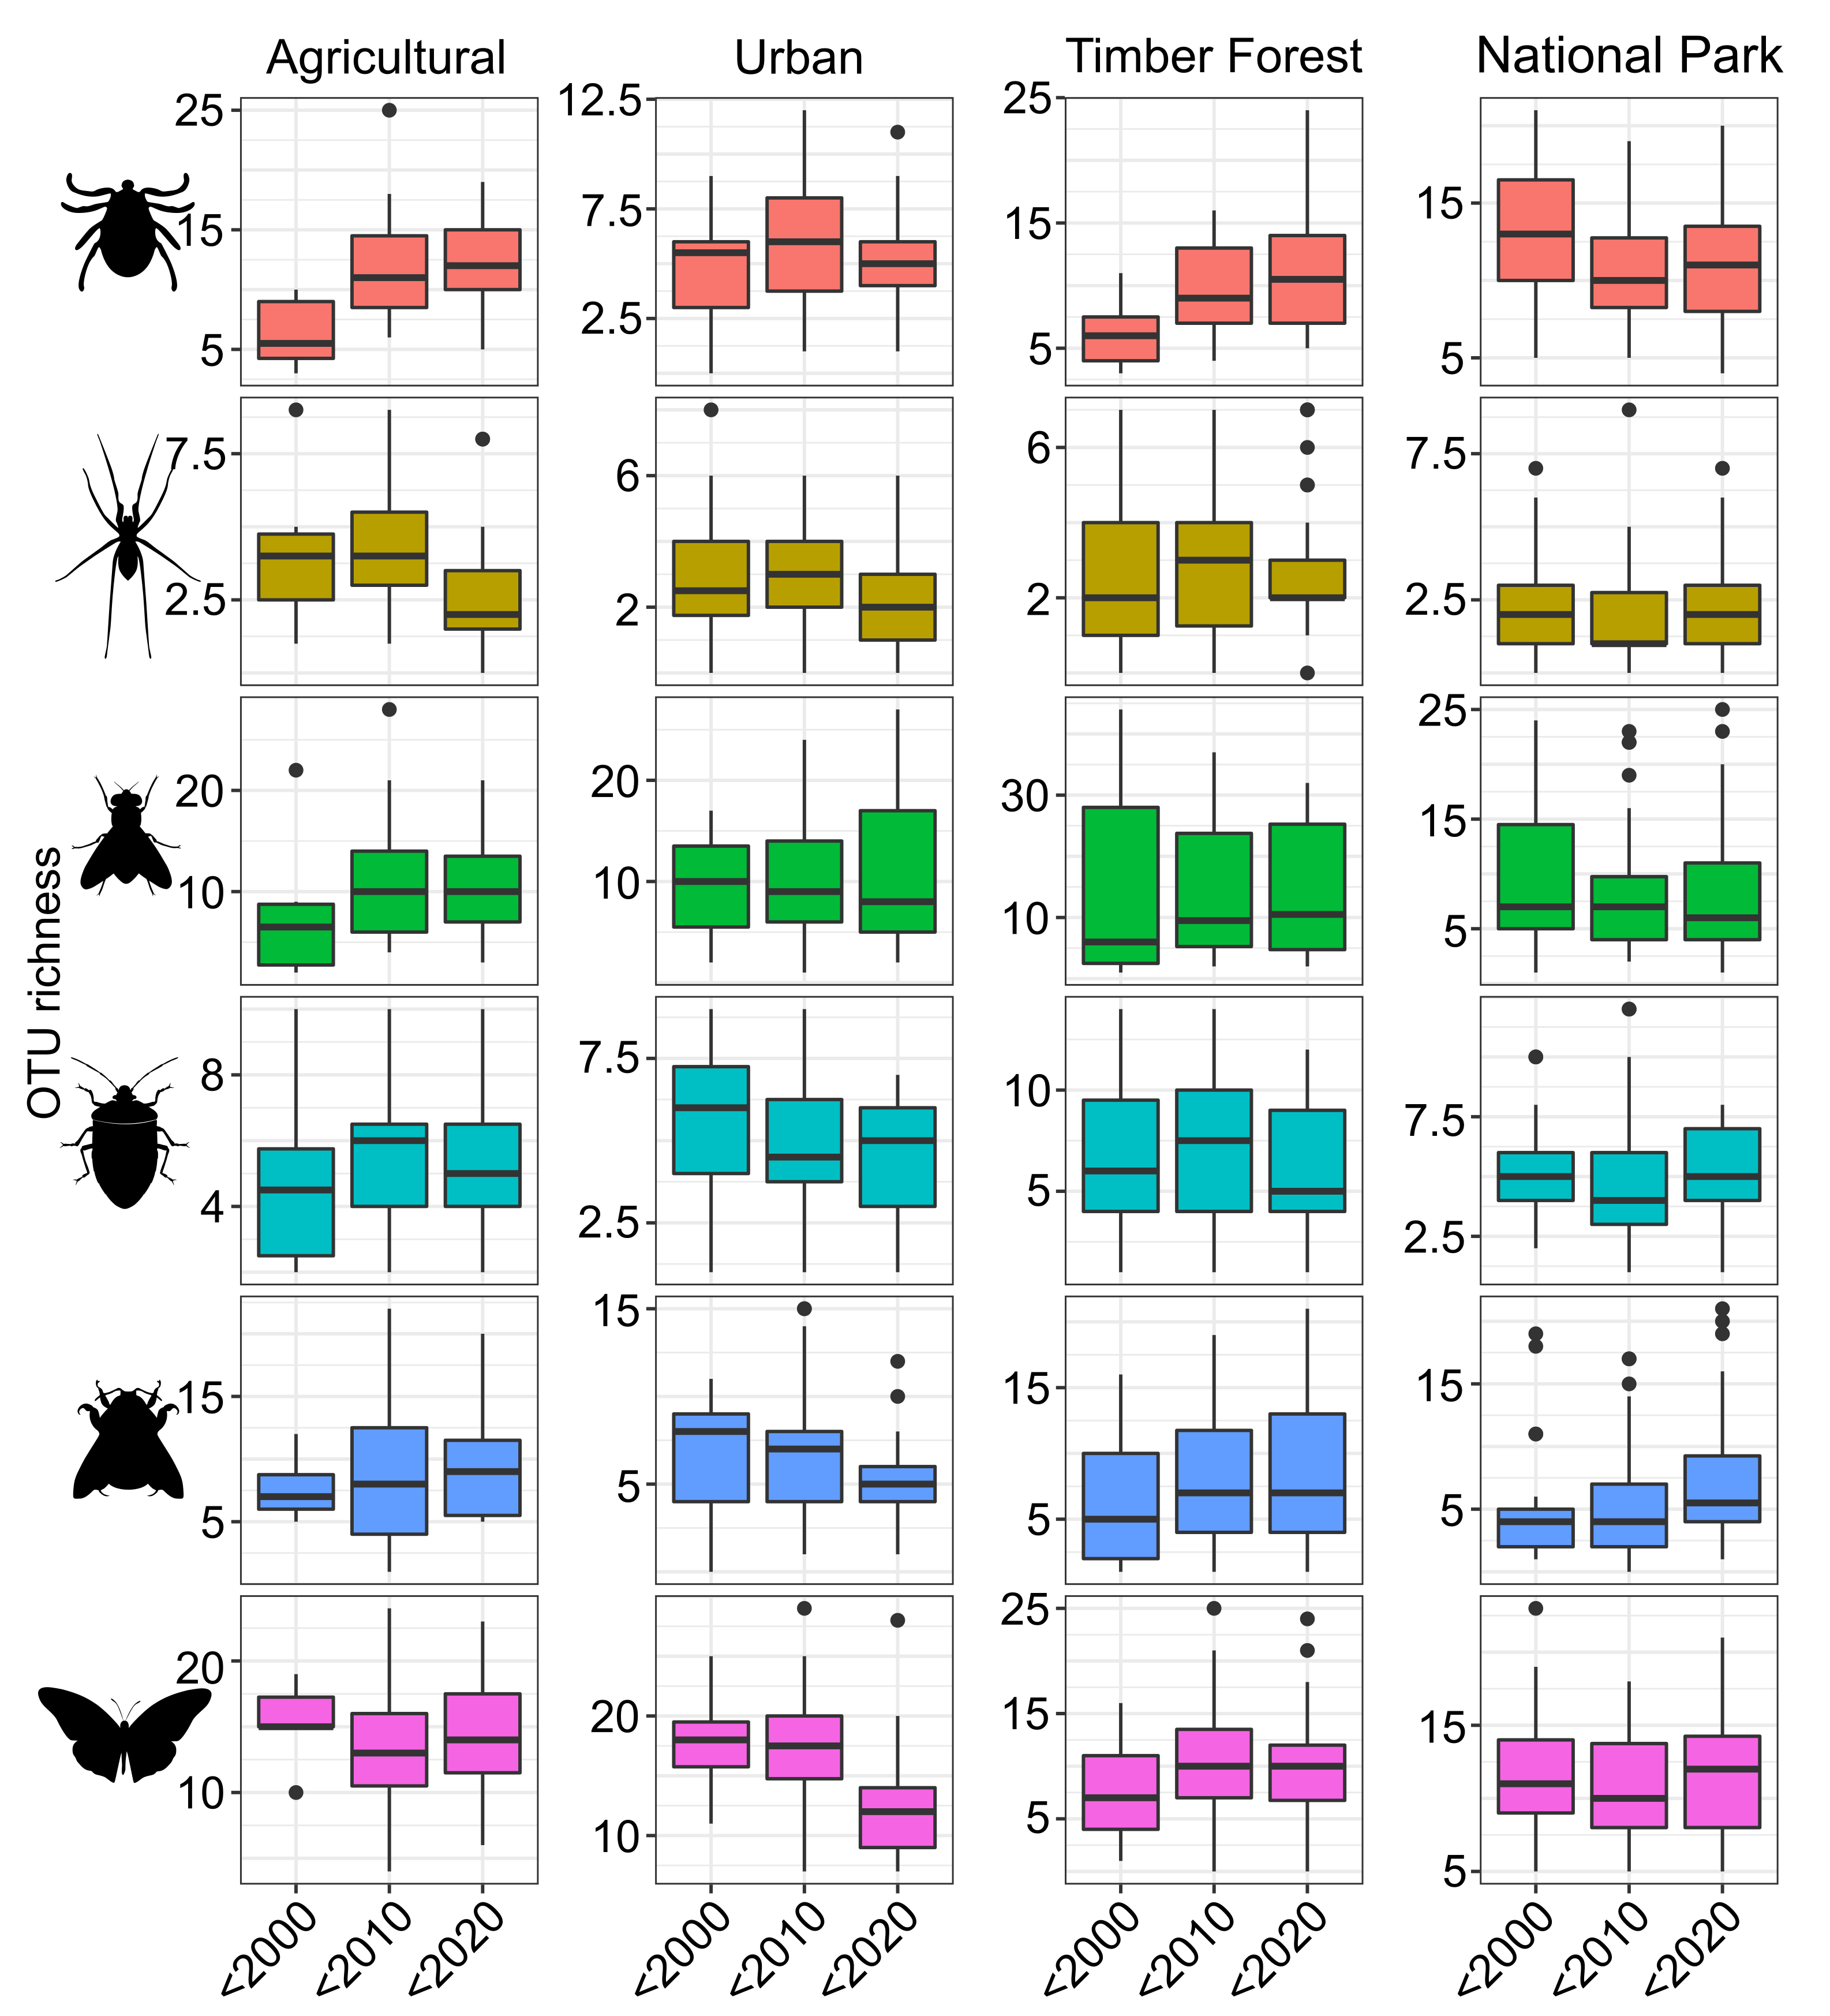

Supplement: supp [file elife-78521-supp-v1.zip › elife_poa_e78521_Figure_4_figure_supplement_2.png]

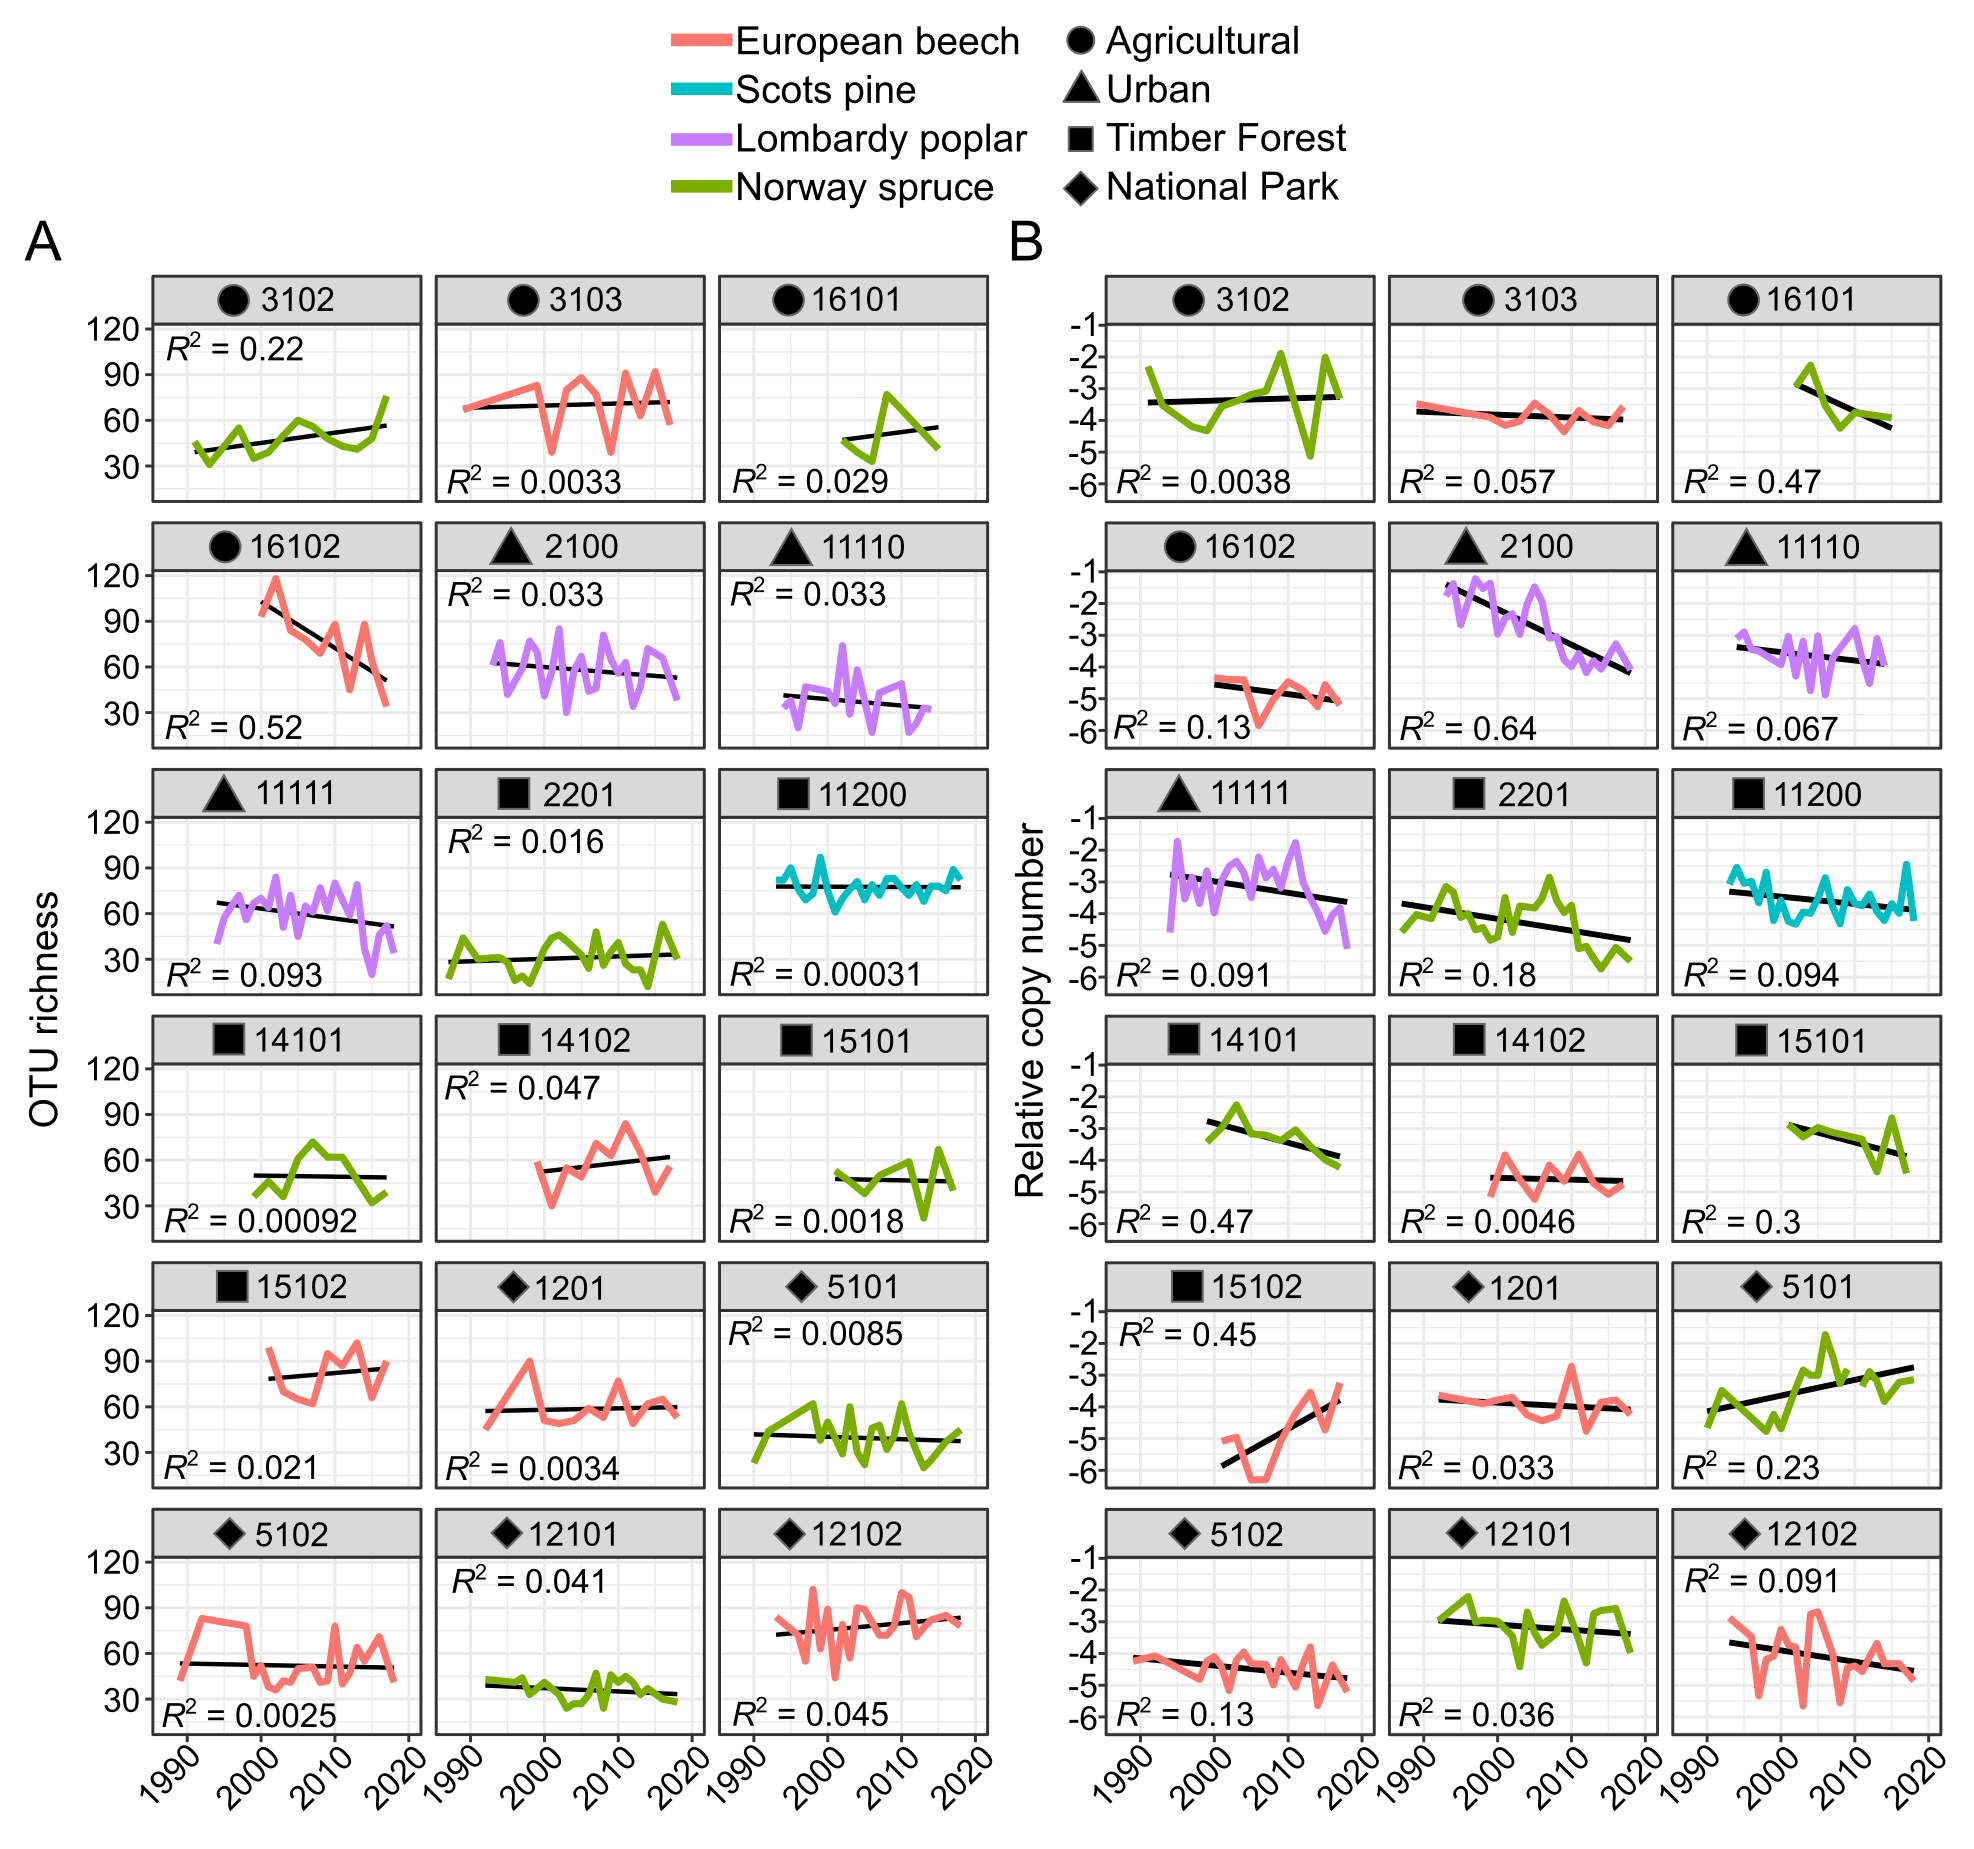

Supplement: supp [file elife-78521-supp-v1.zip › elife_poa_e78521_Figure_4_figure_supplement_3.png]

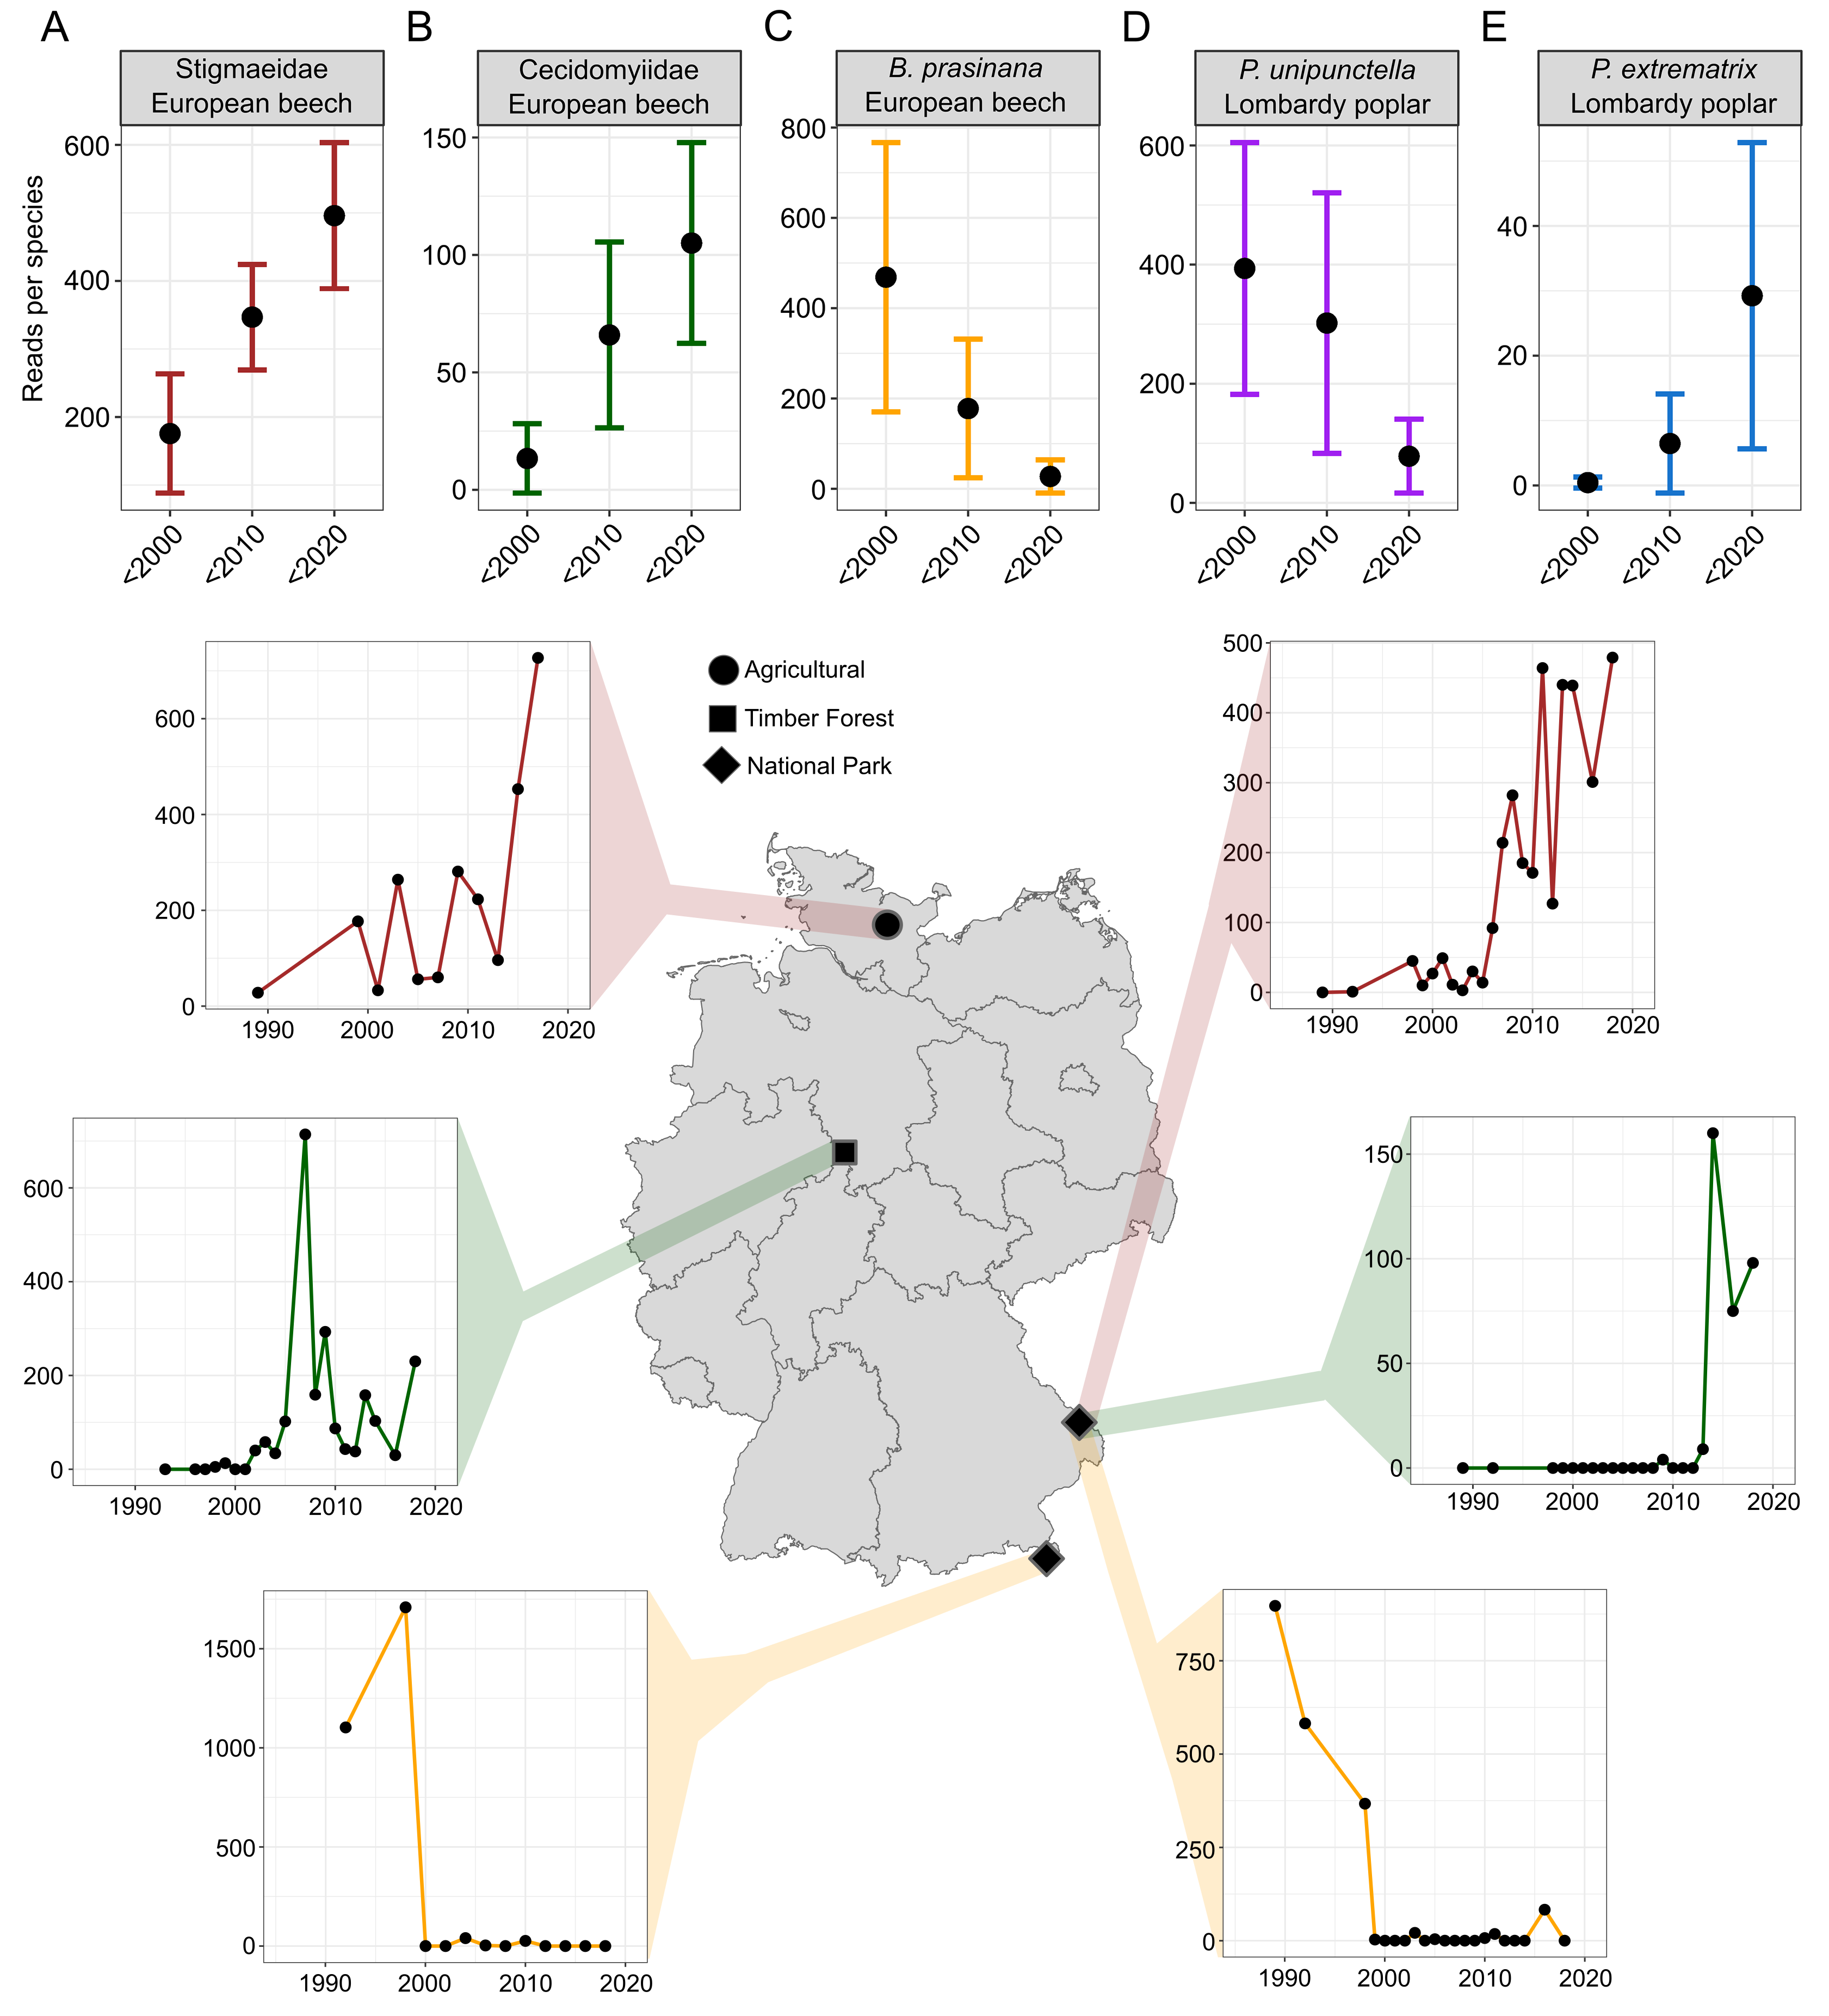

Supplement: supp [file elife-78521-supp-v1.zip › elife_poa_e78521_Figure_5_figure_supplement_1.tif]
